# Supplementary material for: Regulation of developmental gatekeeping and cell fate transition by the calpain protease DEK1 in Physcomitrium patens
Source: PubMed Central journal article supplement (PMC10912778; doi:10.1038/s42003-024-05933-z), 2024-03-04
Supplement: 42003_2024_5933_MOESM2_ESM.pdf [file 42003_2024_5933_MOESM2_ESM.pdf]

# Supplementary Materials for

## **Regulation of developmental gatekeeping and cell fate transition by the calpain protease DEK1 in *Physcomitrium patens***

Viktor Demko, Tatiana Belova, Maxim Messerer, Torgeir R. Hvidsten, Pierre-François Perroud, Ako Eugene Ako, Wenche Johansen, Klaus F.X. Mayer, Odd-Arne Olsen, Daniel Lang\*

\* Corresponding author [daniel.lang@mailbox.org](mailto:daniel.lang@mailbox.org)

### **This PDF file includes:**

- Supplementary Figures S1 to S13
- Description of Supplementary Data sheets S1 to S13
- Supplementary References

All other biological and software resources cited in the main text and this document including the External Files deposited in Zenodo archive [10.5281/zenodo.5513495](https://zenodo.org/record/10.5281/zenodo.5513495) are listed in Supplementary Data sheet S13.

## Supplementary Figures

**S1**

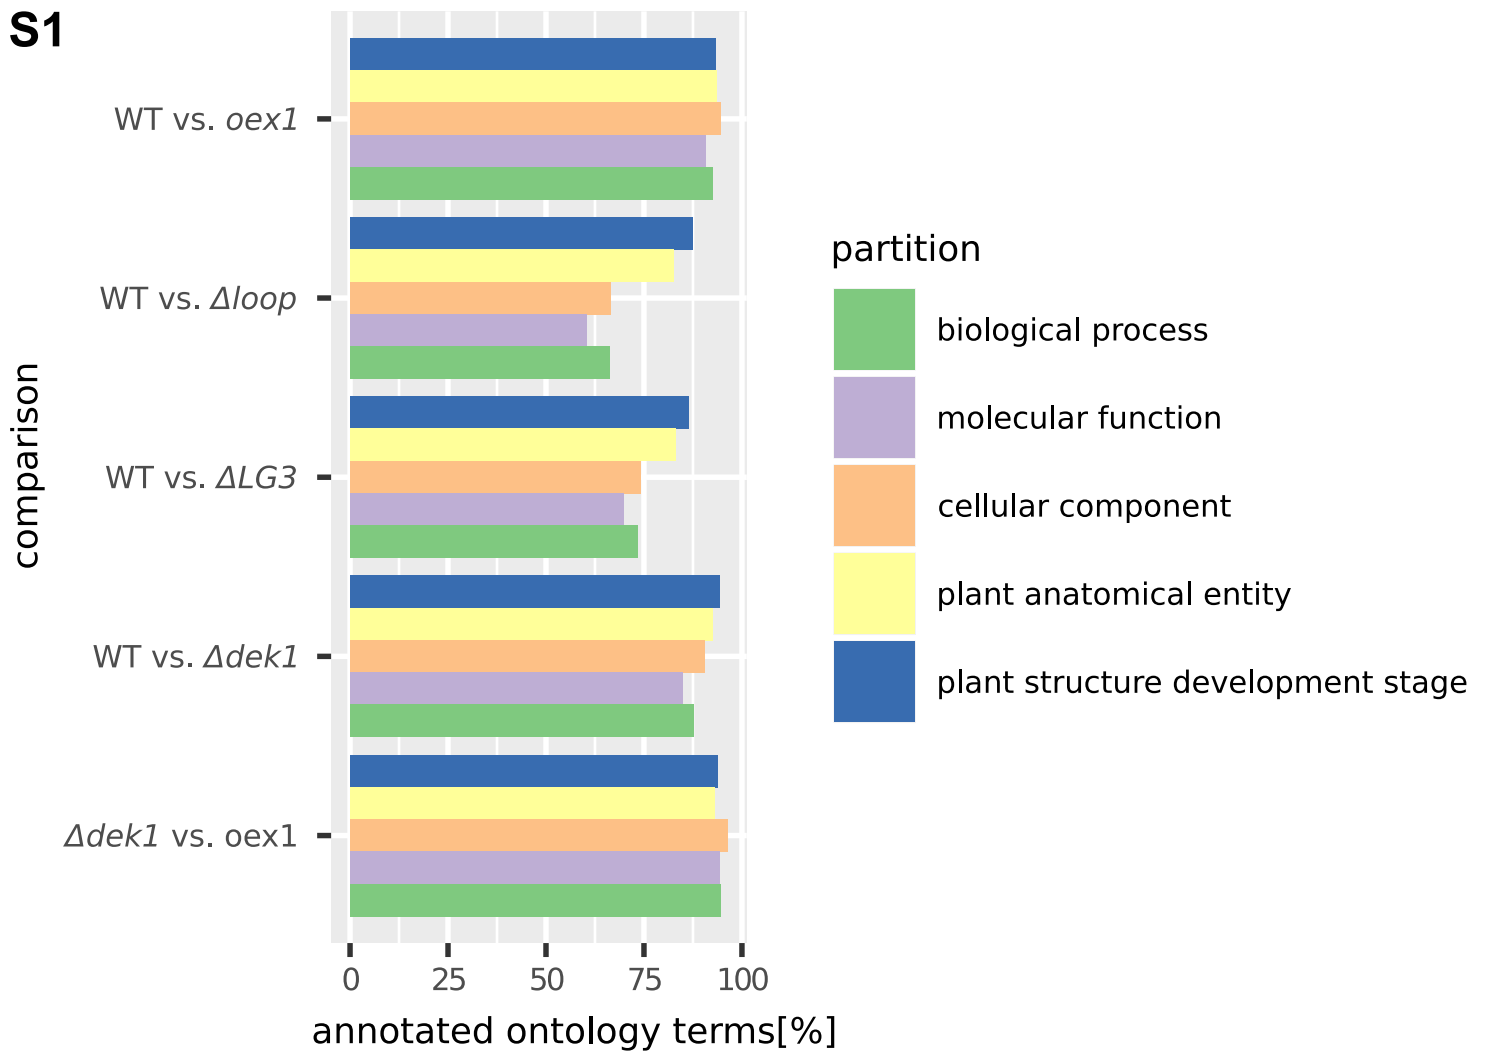

**Supplementary Fig. S1.**

**Percentage of ontology terms in deregulated genes indicates that DEK1 mutation affects most cellular and organismic functions.** Percentage of unique ontology terms from the Gene Ontology *biological process*, *molecular function*, *cellular component* partitions and the Plant Ontology *plant anatomical entity* and *plant structure development stage* partitions that are assigned to deregulated genes in the mutant lines.

# S2

## a

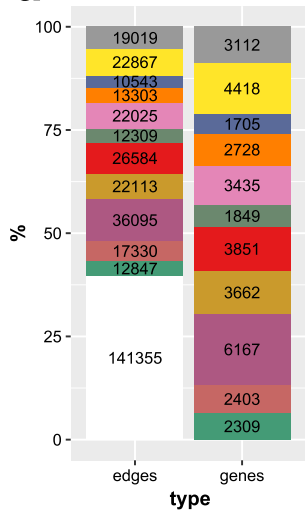

## b

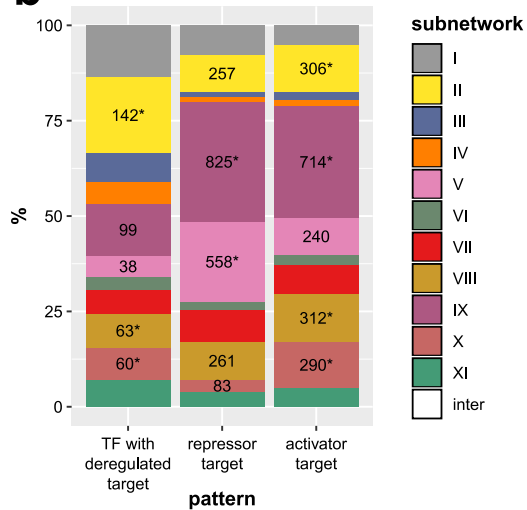

## c

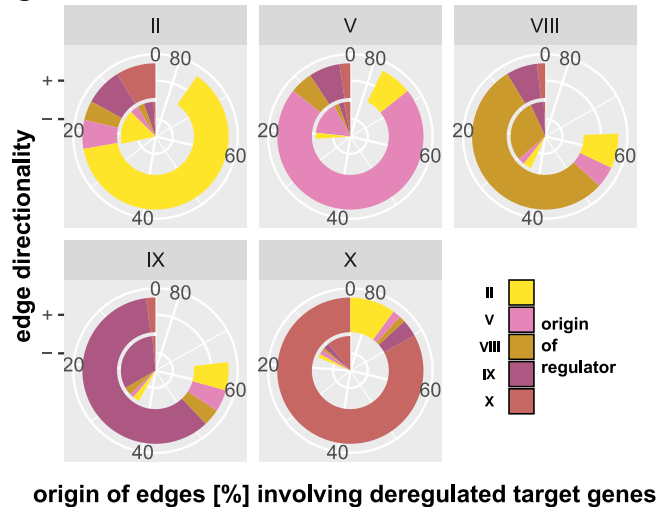

## d

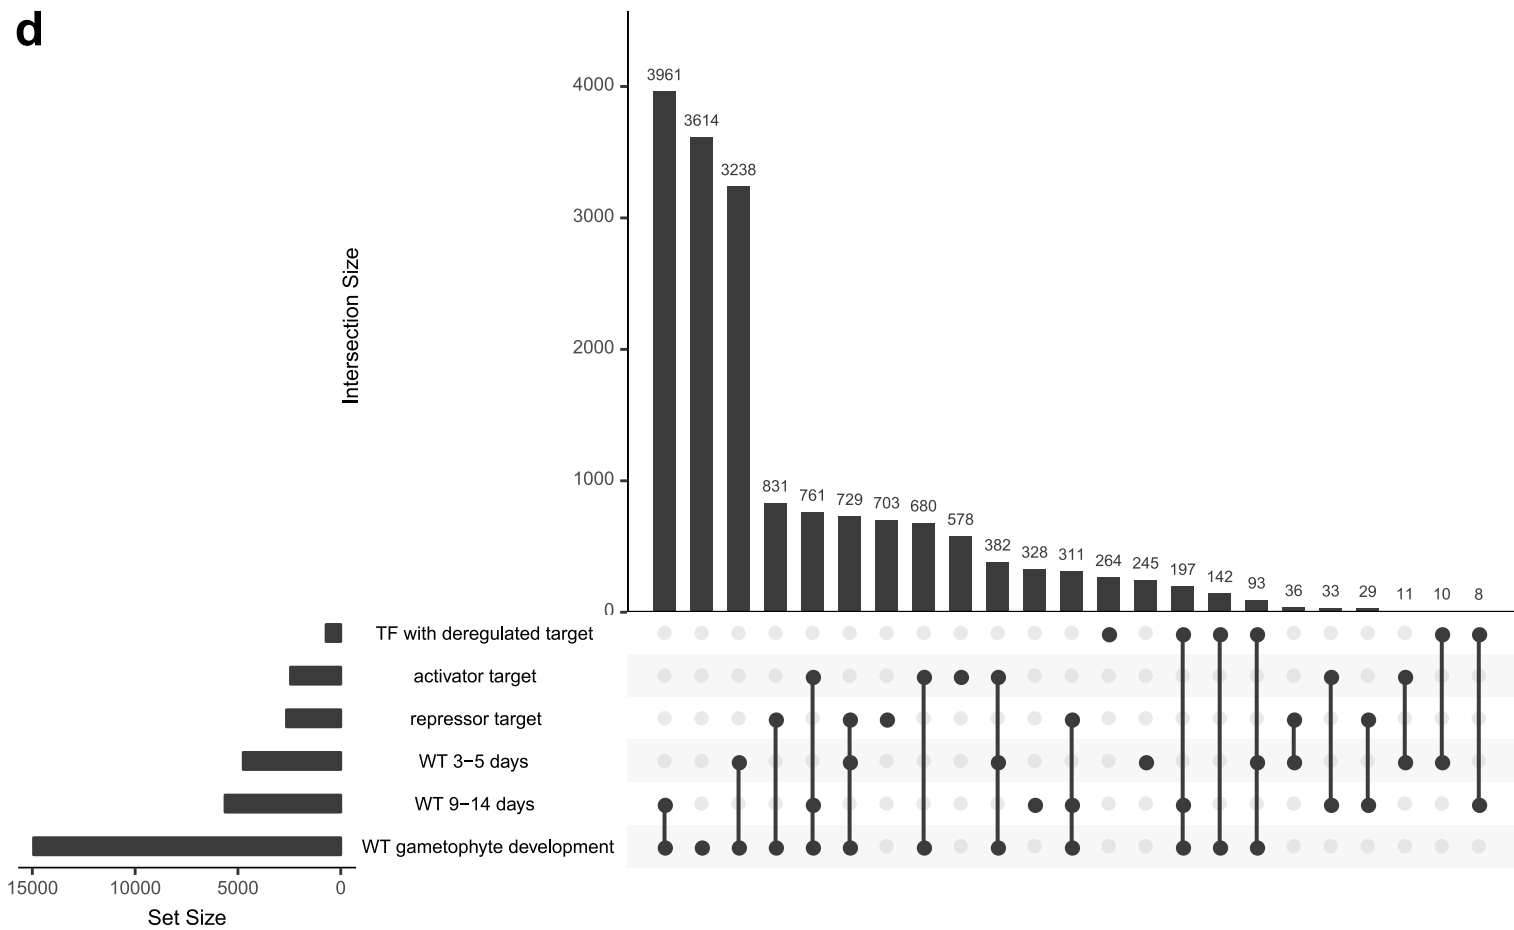

## Supplementary Fig. S2.

### Tracing DEK1 impact on the gene regulatory networks (GRN) of *Physcomitrium patens*.

**S2a. Summary of the predicted *P. patens* GRN.** Bar plot depicts the percentage of total edges (regulatory interactions) and nodes (genes) comprising the 11 subnetworks that form the *P. patens* GRN. Absolute numbers are given as bar stack annotations. Inter-subnetwork edges are displayed in white.

**S2b. Network enrichment analysis of DEK1-deregulated genes.** Bar plot displaying the major patterns of deregulation in *DEK1* mutants (middle and right bar) as well as upstream transcription factors (left bar) predicted to directly target the affected genes across the 11 subnetworks. Numeric annotations in bar stacks are provided for subnetworks with significant (FDR < 0.01; network enrichment analysis) enrichment of genes with a mutant deregulation pattern that is consistent with being a target of a DEK1-regulated activator or repressor (see Fig. 1e and 1f) and depicted in the network graph of Fig. 2b. An asterisk indicates individual, significant data points.

**S2c. Inter- and intra-connections between enriched subnetworks.** Pie chart depicting the overall percentage of edges within and between the enriched subnetworks (Fig. 2b and Supplementary Fig. S2b) split according to edge directionality inferred by Pearson correlation coefficient of normalized expression levels ( $r > 0$  [+]: outer ring;  $r < 0$  [-]: inner ring). Individual subplots display the subnetwork origin of the target while the color-coding depicts the subnetwork origin of the respective regulator.

**S2d. Non-redundant intersections between the different gene sets.** UpsetR plot displaying non-overlapping intersections between different gene sets discussed in the main text and figures (Fig. 2 and Supplementary Fig. S2b). The gene sets are available as individual lists in the supplementary file archive (`gene_sets.zip`).

S3a

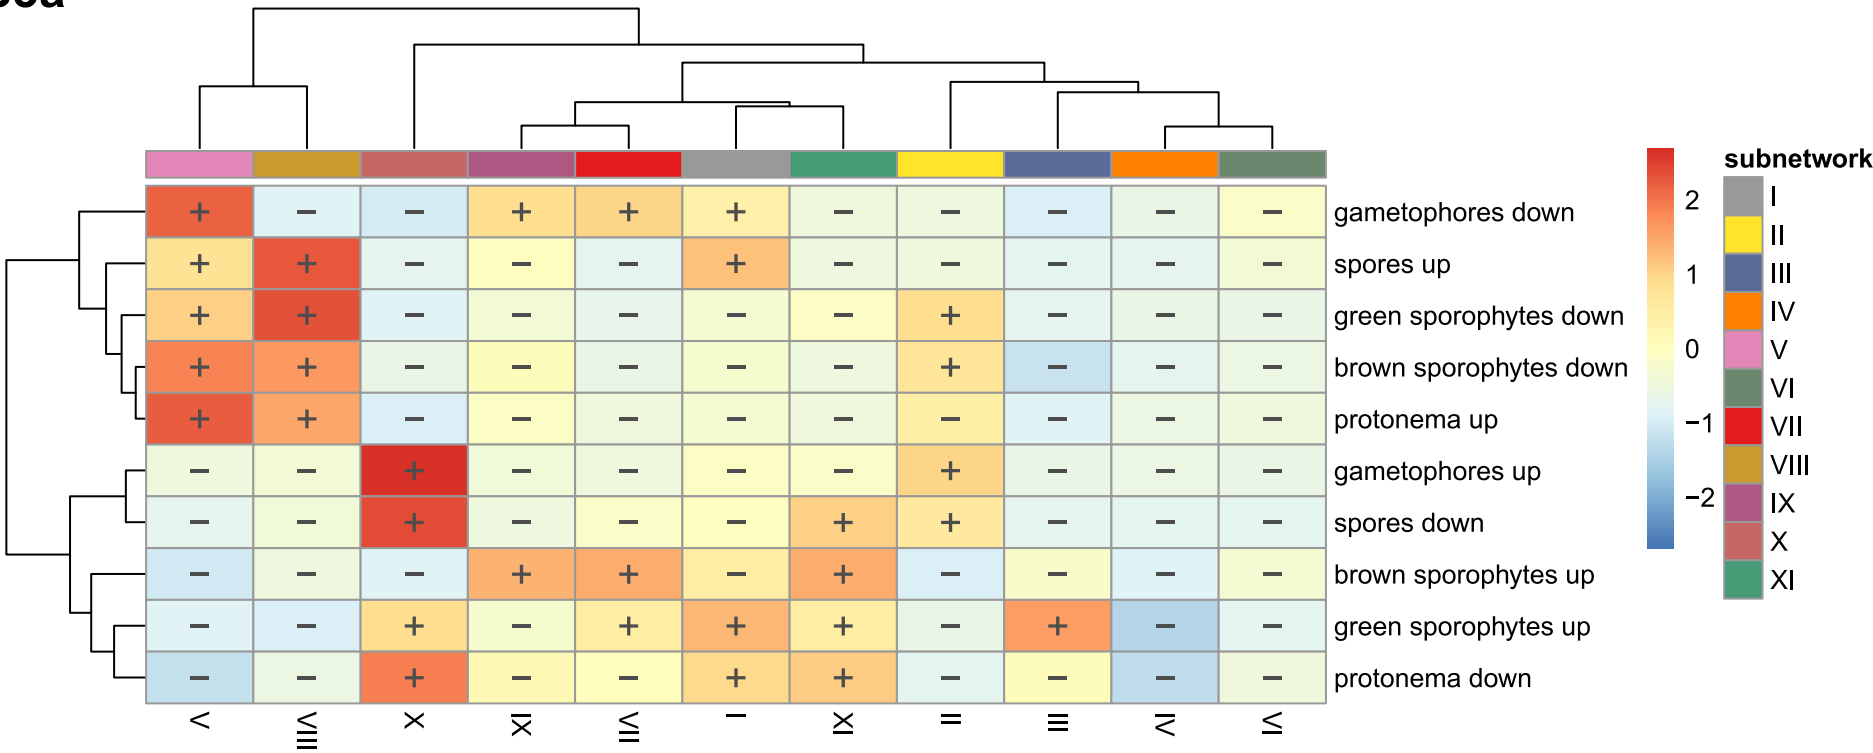

# S3b

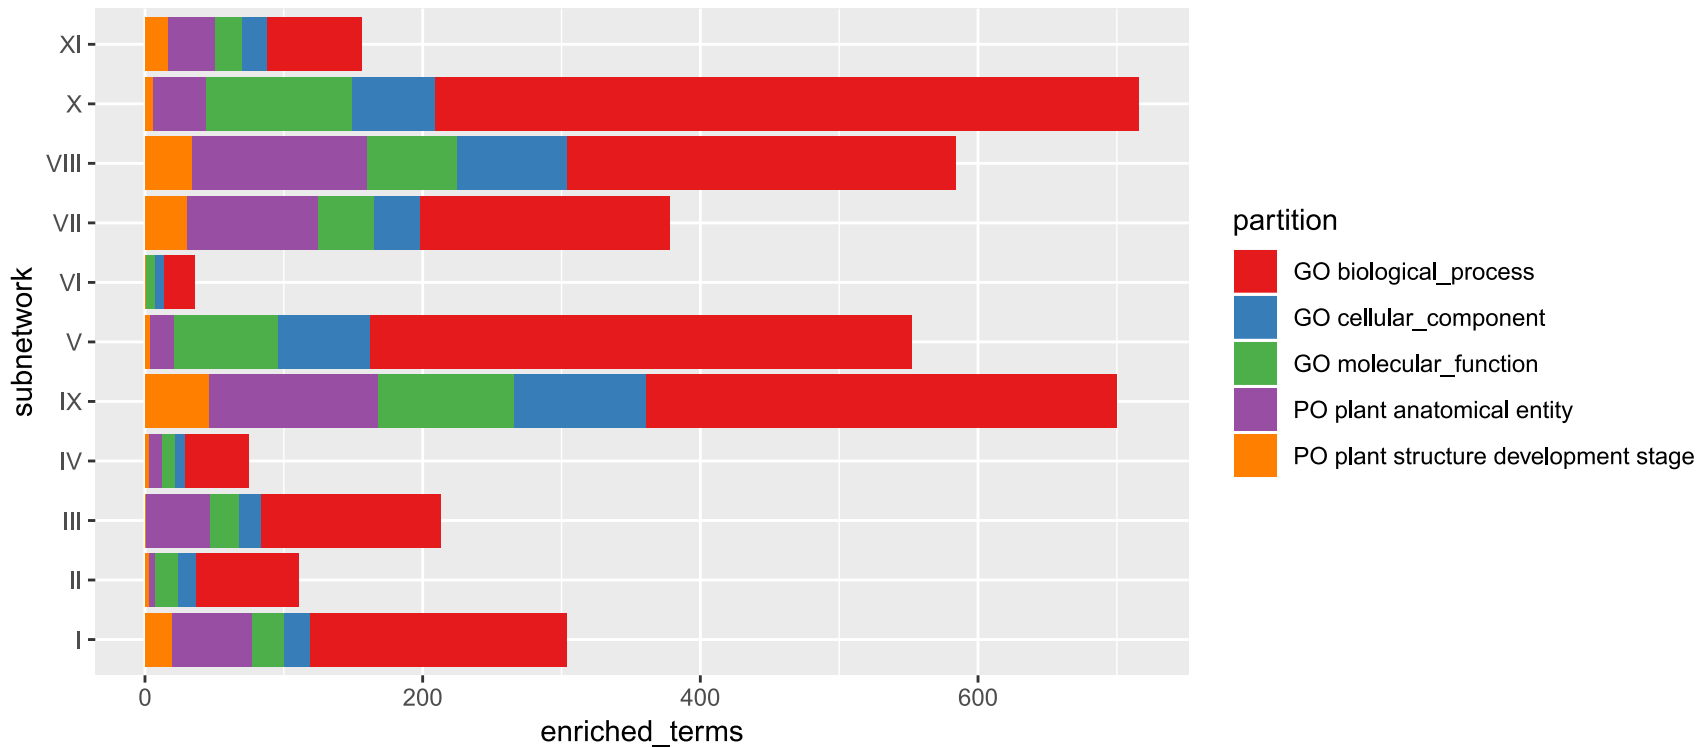



# S3c

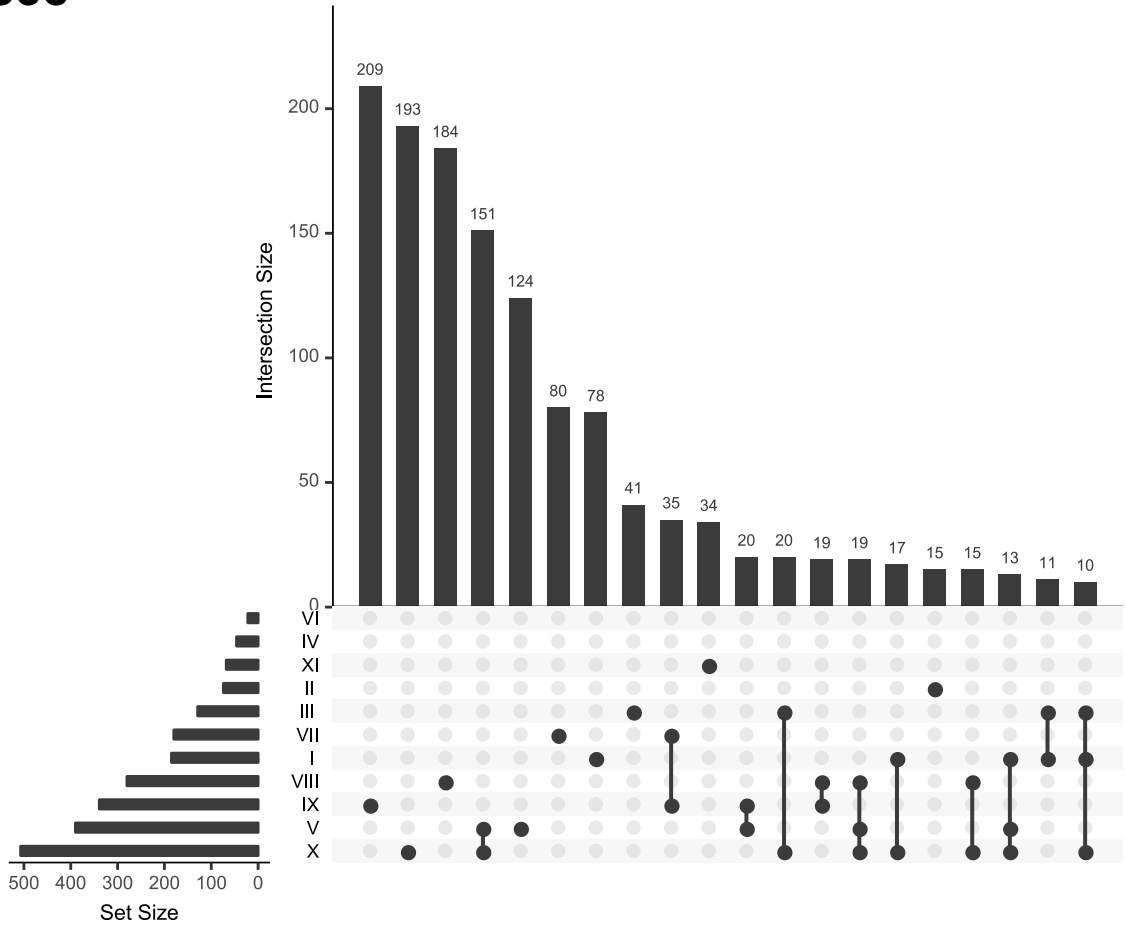

S3d

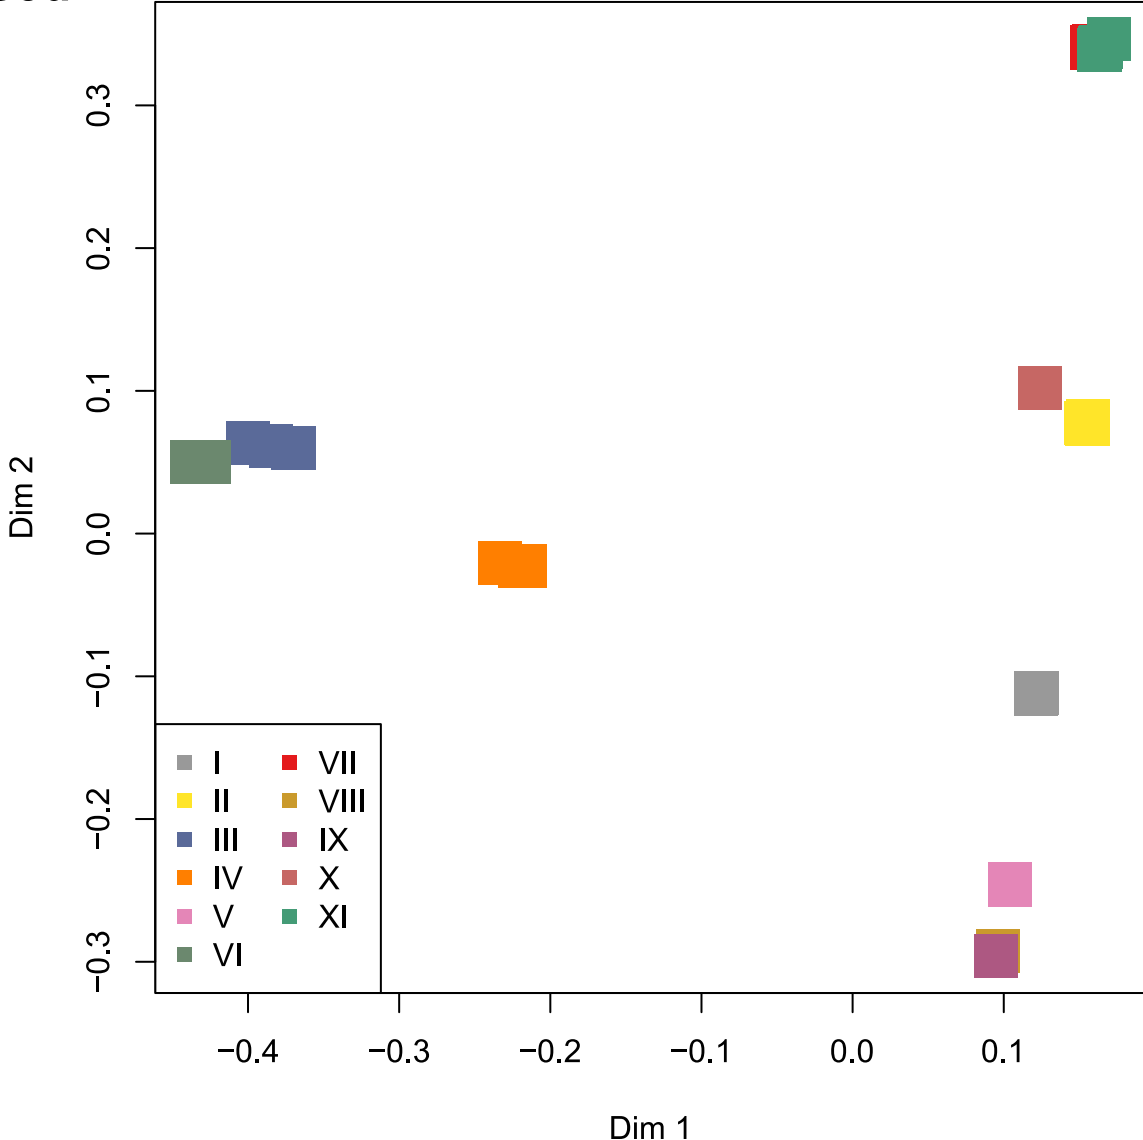

S3e

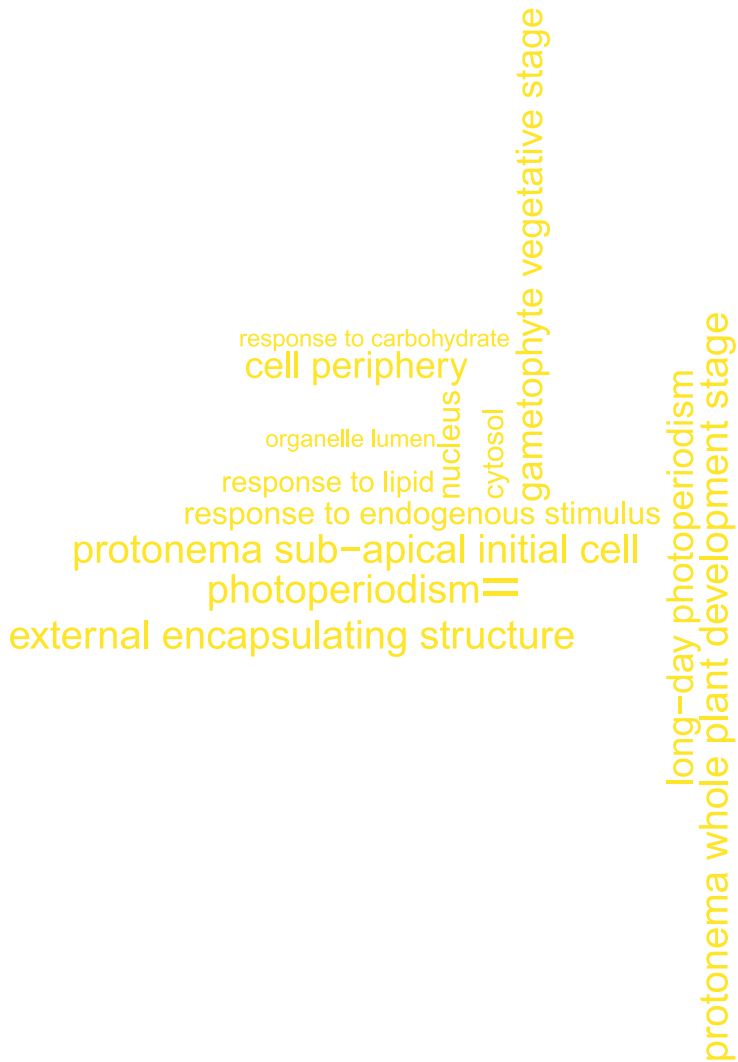

S3f

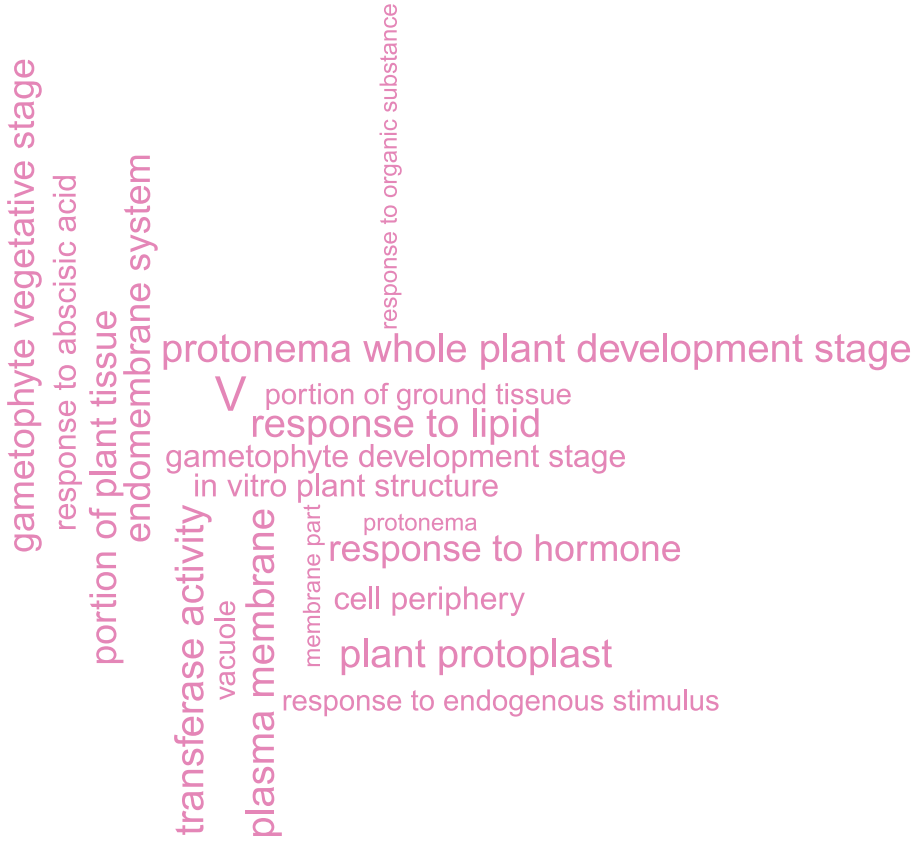

S3g

plastid stroma  
sporangium  
chloroplast stroma  
gametophore vegetative whole plant development stage  
oxidoreductase activity  
VIII  
lamina envelope  
phyllome lamina  
plastid envelope  
plant spore stage  
cauline leaf  
leaf lamina base  
response to acid chemical  
response to blue light  
response to red or far red light  
bud development stage  
gametophyte vegetative stage  
photosynthetic membrane  
phyllome development stage  
response to absence of light  
response to red light

# S3h

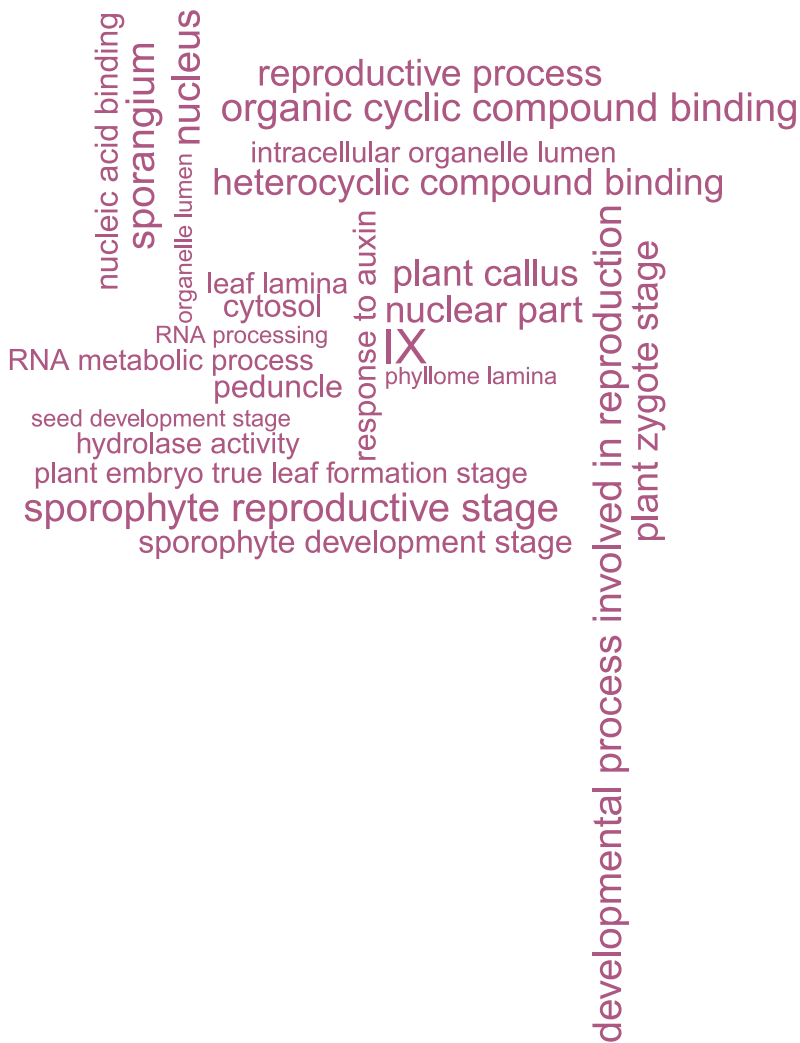

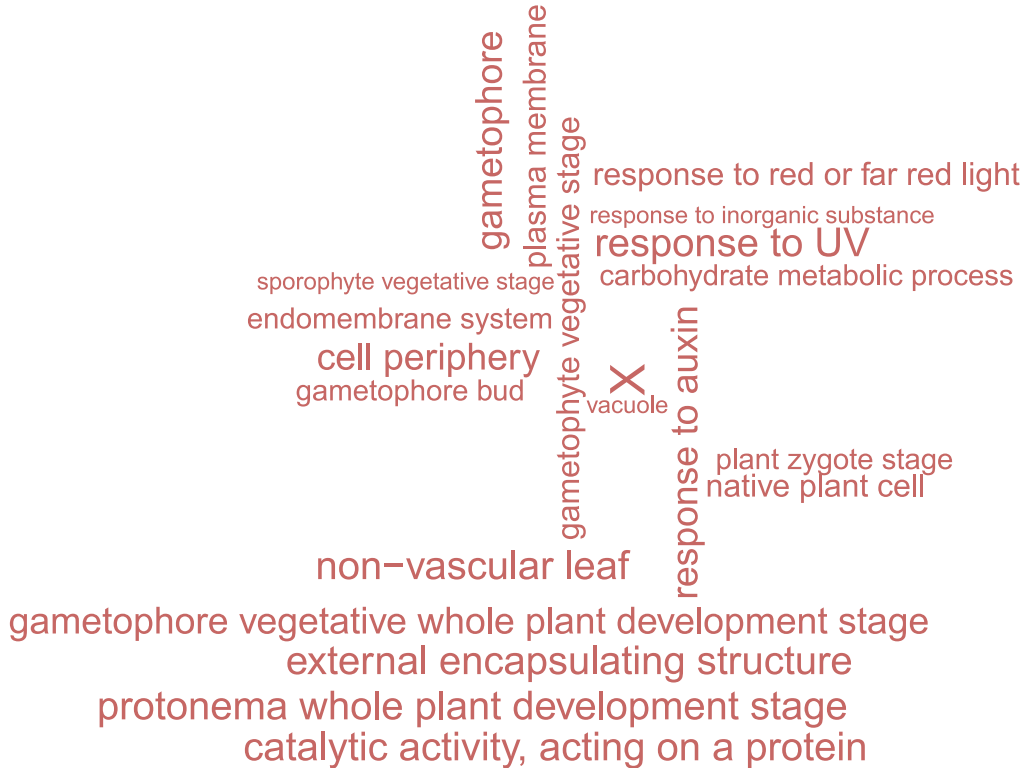

### Supplementary Fig. S3.

**Functional characterization of the subnetworks.** We utilized the developmental stage samples included in the *P. patens* Gene Atlas<sup>1</sup> as well as Plant Ontology and Gene Ontology annotations for functional characterization of the subnetworks generated in this study. Both approaches independently considered the network's structure to assess overrepresentation of functional concepts among the genes in the network. The ontology analysis comprised a multi-step procedure relying on a machine learning approach to identify the most specific and characteristic terms for the genes encoded in each subnetwork. The final set of most characteristic PO and GO terms for each enriched subnetwork (Panels S3e-i) comprises the ontology terms that were most informative to classify the top20 master regulators from each subnetwork according to their targets' functional composition.

**S3a. Network enrichment analysis of differentially expressed genes in developmental stages from the *P. patens* Expression Atlas.** We inferred up- and down-regulated genes for each developmental stage represented in the Gene Atlas data by performing differential gene expression analysis using a combination of the likelihood ratio test (LRT) and Wald test implemented in R/sleuth<sup>2</sup> comparing the samples derived from the respective stage with all other samples. Results were filtered using LRT-  $q$ value  $< 0.1$  and classified into up and down-regulation based on  $b$ -values of the Wald test. Individual gene sets were tested for undirected enrichment in the subnetworks using the R/NEAT software package. Results were plotted as ratios of observed/expected values in a heatmap using the R/heatmap package annotating significant ( $FDR < 0.01$ ) enrichment and depletion.

**S3b. Subnetwork ontology enrichment analysis.** We performed ontology enrichment analysis for the subnetworks based on an updated Plant Ontology (PO) and Gene Ontology (GO) annotations available as part of the supplementary file archive using the command line version of Ontologizer with Benjamini-Hochberg (FDR) correction at 90% confidence. The stacked bar chart depicts the absolute numbers of filtered enriched terms.

**S3c. Non-redundant overlap among GO biological process (BP) concepts among the subnetworks.** Consistent with gene regulatory subnetworks potentially encoding distinct cell fates, enriched terms overlapped among some of the subnetworks. The bar chart displays an UpsetR analysis of the 20 largest non-redundant sets of enriched GO BP terms.

**S3d. Functional similarity of the subnetworks' top20 master regulators' targets.** In order to identify the most specific enriched terms considering the network structure and hierarchy, we employed the Random Forest machine learning approach classifying subnetwork membership of the master regulators using their targets' association among the globally enriched GO and PO terms. Globally enriched terms were selected analyzing enrichment in the subnetworks regulatory links using R/NEAT with  $FDR < 0.01$ . Multidimensional scaling plot of proximity matrix from R/randomForest of the top20 master regulators for each subnetwork.

**S3e-i. Top5 most specific concepts to describe targets in subnetworks II, V, VIII, IX and X.** Word cloud representations of the most important terms for each subnetwork to classify subnetwork membership of the top20 master regulators using the Random Forest predictor. We selected and ranked terms for each subnetwork demanding variable importance  $> 0$  using the decrease in node impurity based on the Gini index implemented by the R/randomForest package. See Supplementary Data sheet S3 for complete results.



# S4

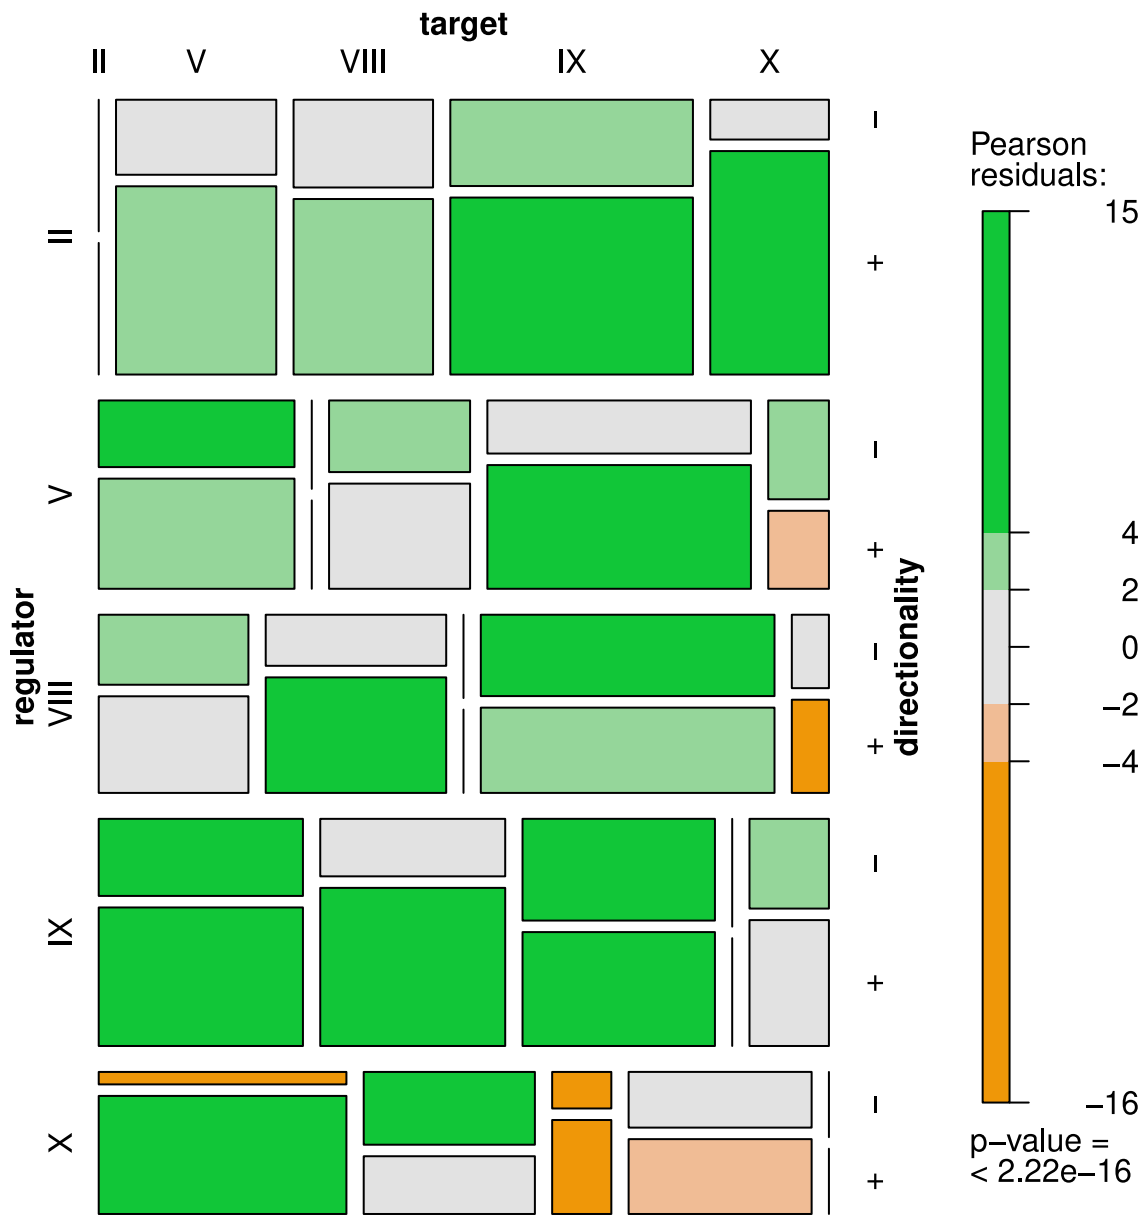

**Supplementary Fig. S4.**

**Mosaic plot of inter-subnetwork connections.** Mosaic plot or *Marimekko diagram* showing the cross-sectional distribution of inter-subnetwork connections considering the predicted directionality based on the Pearson correlation coefficient of expression profiles between a regulator and a predicted target from another subnetwork. Color-scale of the boxes depicts the distribution of Pearson residuals indicating significant over- (green) or under- (orange) representation of inter-connecting edges obtained from a significant  $\chi^2$  test (p-value  $< 2.22e^{-16}$ ).





## Supplementary Fig. S5.

### K-shortest simple path network graphs.

**S5a. APB regulatory hierarchy.** Network plot depicting the regulatory hierarchy of the AINTEGUMENTA, PLETHORA and BABY BOOM (APB) subfamily<sup>28, 29</sup> of AP2/ANT transcription factors in *P. patens*<sup>5</sup>. The network subgraph was extracted using the PathLinker<sup>6</sup> Cytoscape app (k = 20) and visualized in Cytoscape<sup>7</sup>. Nodes are color-coded by subnetwork identity. Node shapes differentiate between NERD-targeted calpain cleavages (Arg-N-end rule = triangle) and no or other cleavages (round rectangle). Edge arrows indicate predicted directionality based on the Pearson correlation coefficient of expression profiles (R >0 black arrowhead; R <0 red square). Edge width is based on the path rank score obtained from the PathLinker algorithm (1. rank = thickest).

**S5b. DEK1 upstream regulon.** Network plot depicting the upstream regulatory context of DEK1. The network subgraph was extracted using the PathLinker Cytoscape app (k = 50) and visualized in Cytoscape. Nodes are color-coded by subnetwork identity. Node shapes differentiate between NERD-targeted calpain cleavages (Arg-N-end rule = triangle) and no or other cleavages (round rectangle). Edge arrows indicate predicted directionality based on the Pearson correlation coefficient of expression profiles (R >0 black arrowhead; R <0 red square). Edge width is based on the path rank score obtained from the PathLinker algorithm (1. rank = thickest).

S6a

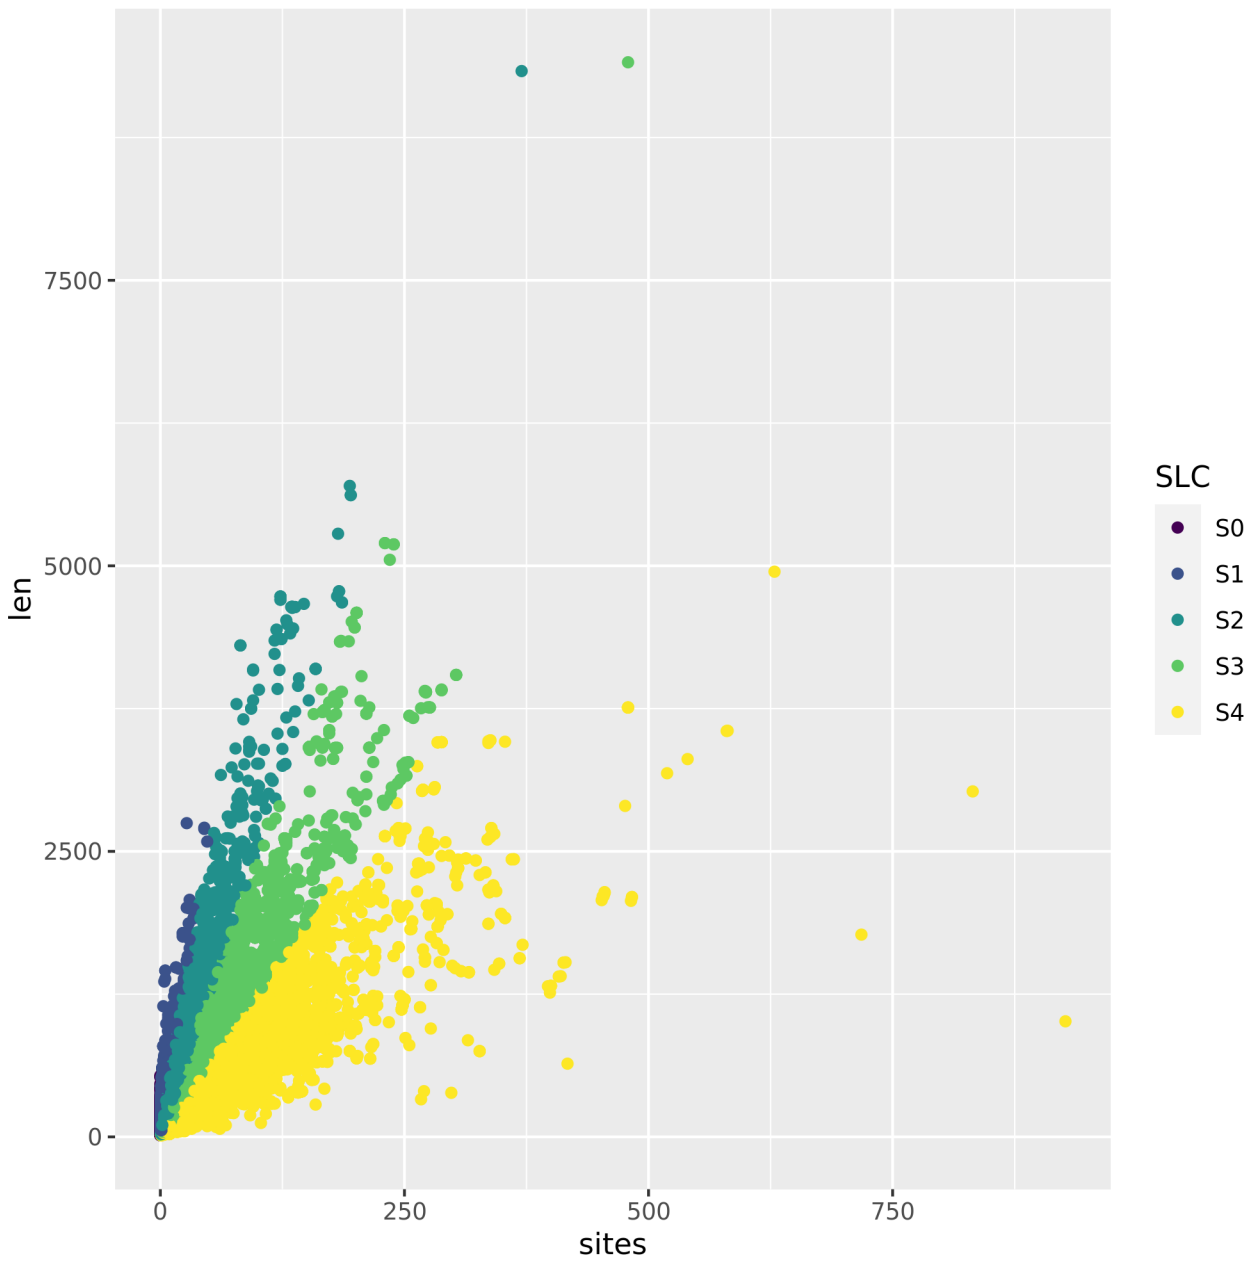

# S6b

## Variables – PCA

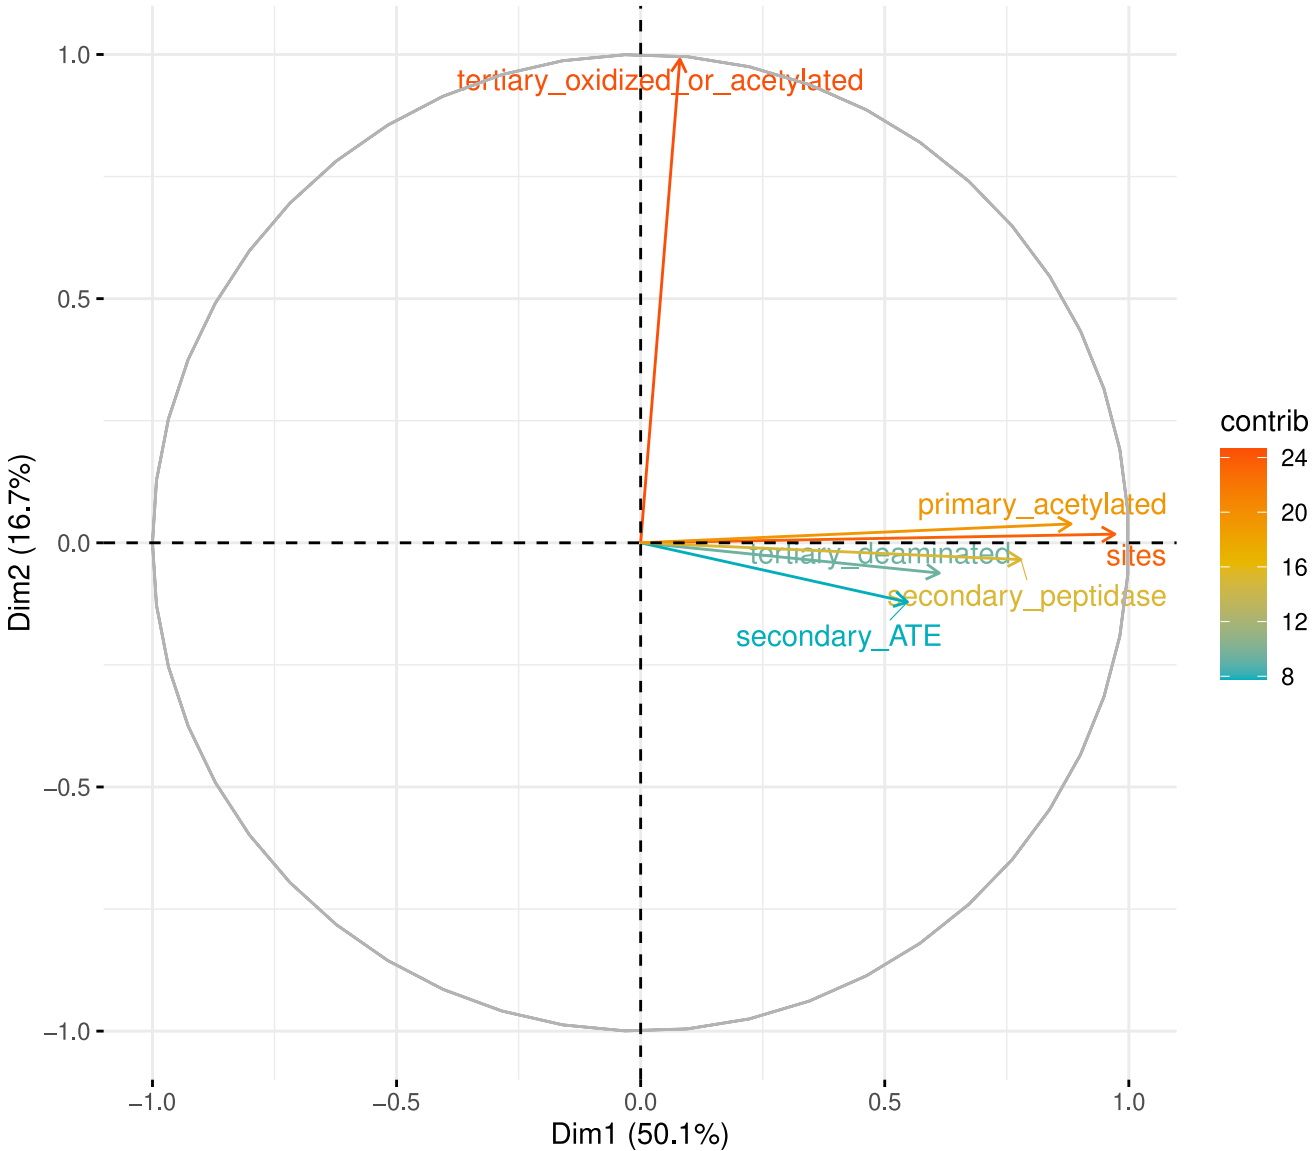







S6e

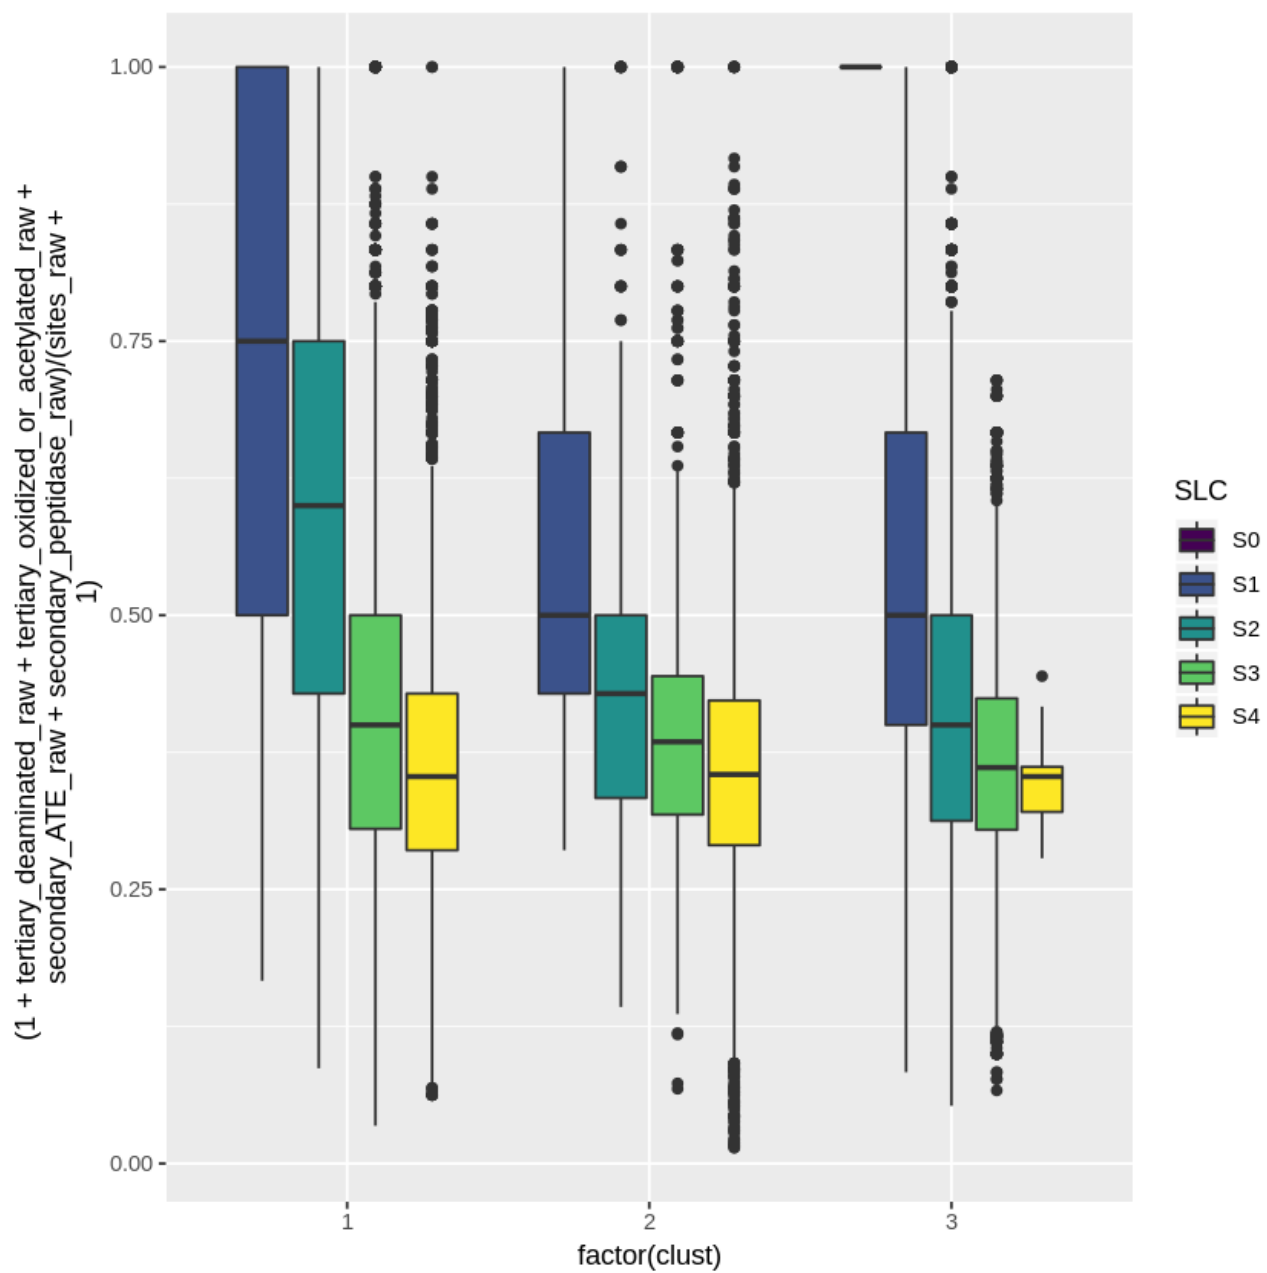

# S6f

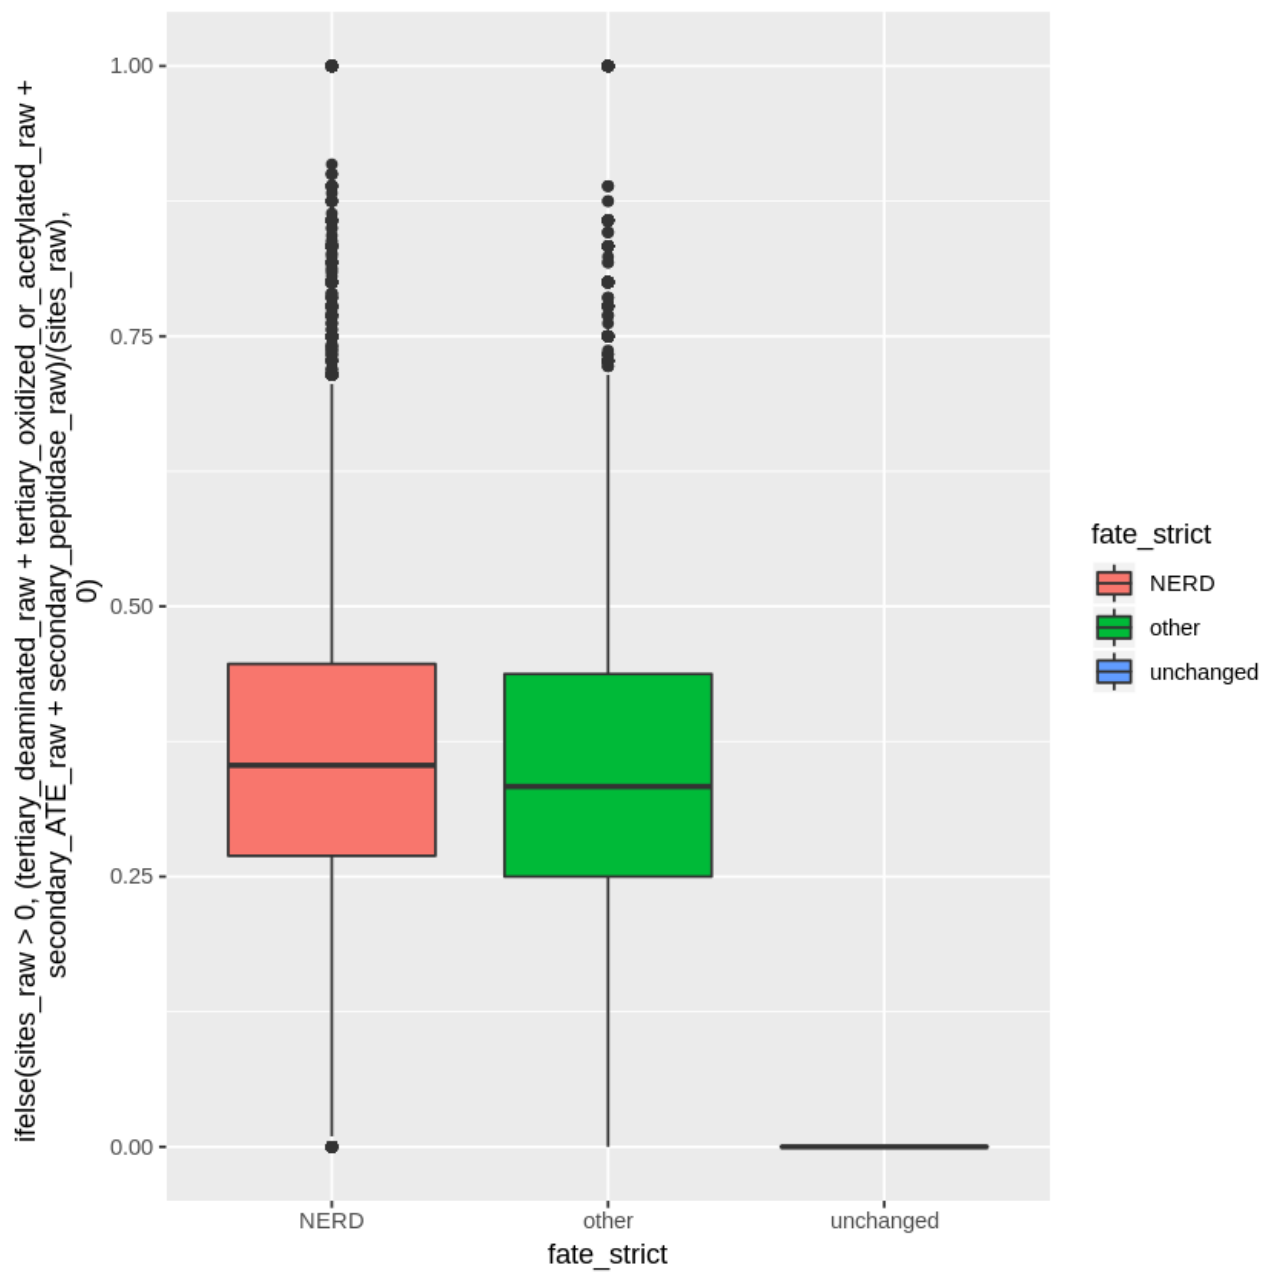

# S6g

deregulation in mutants

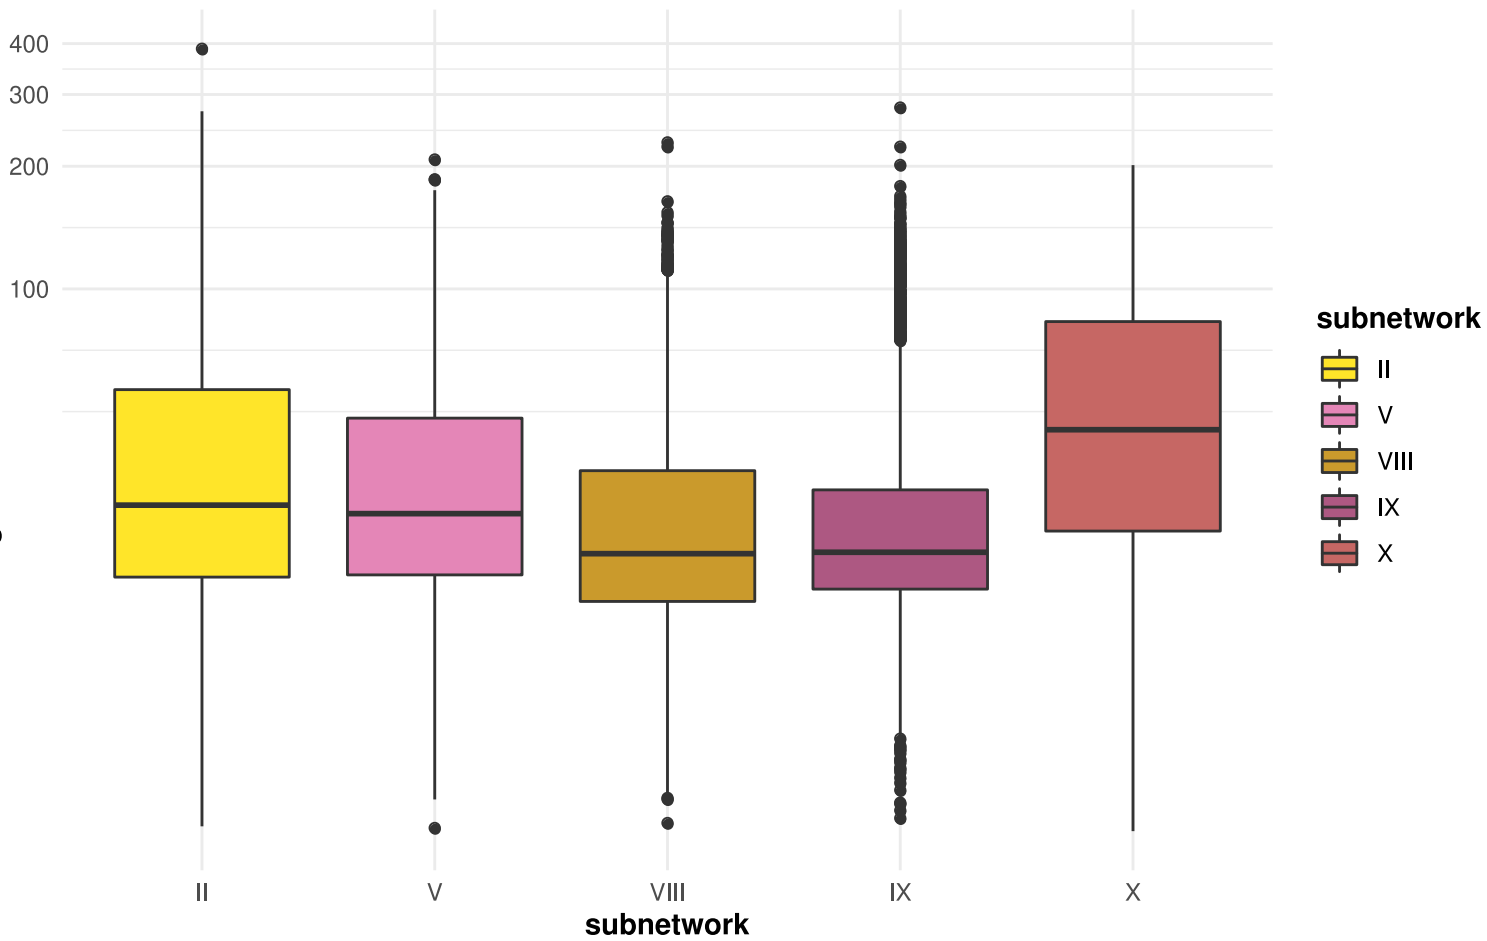

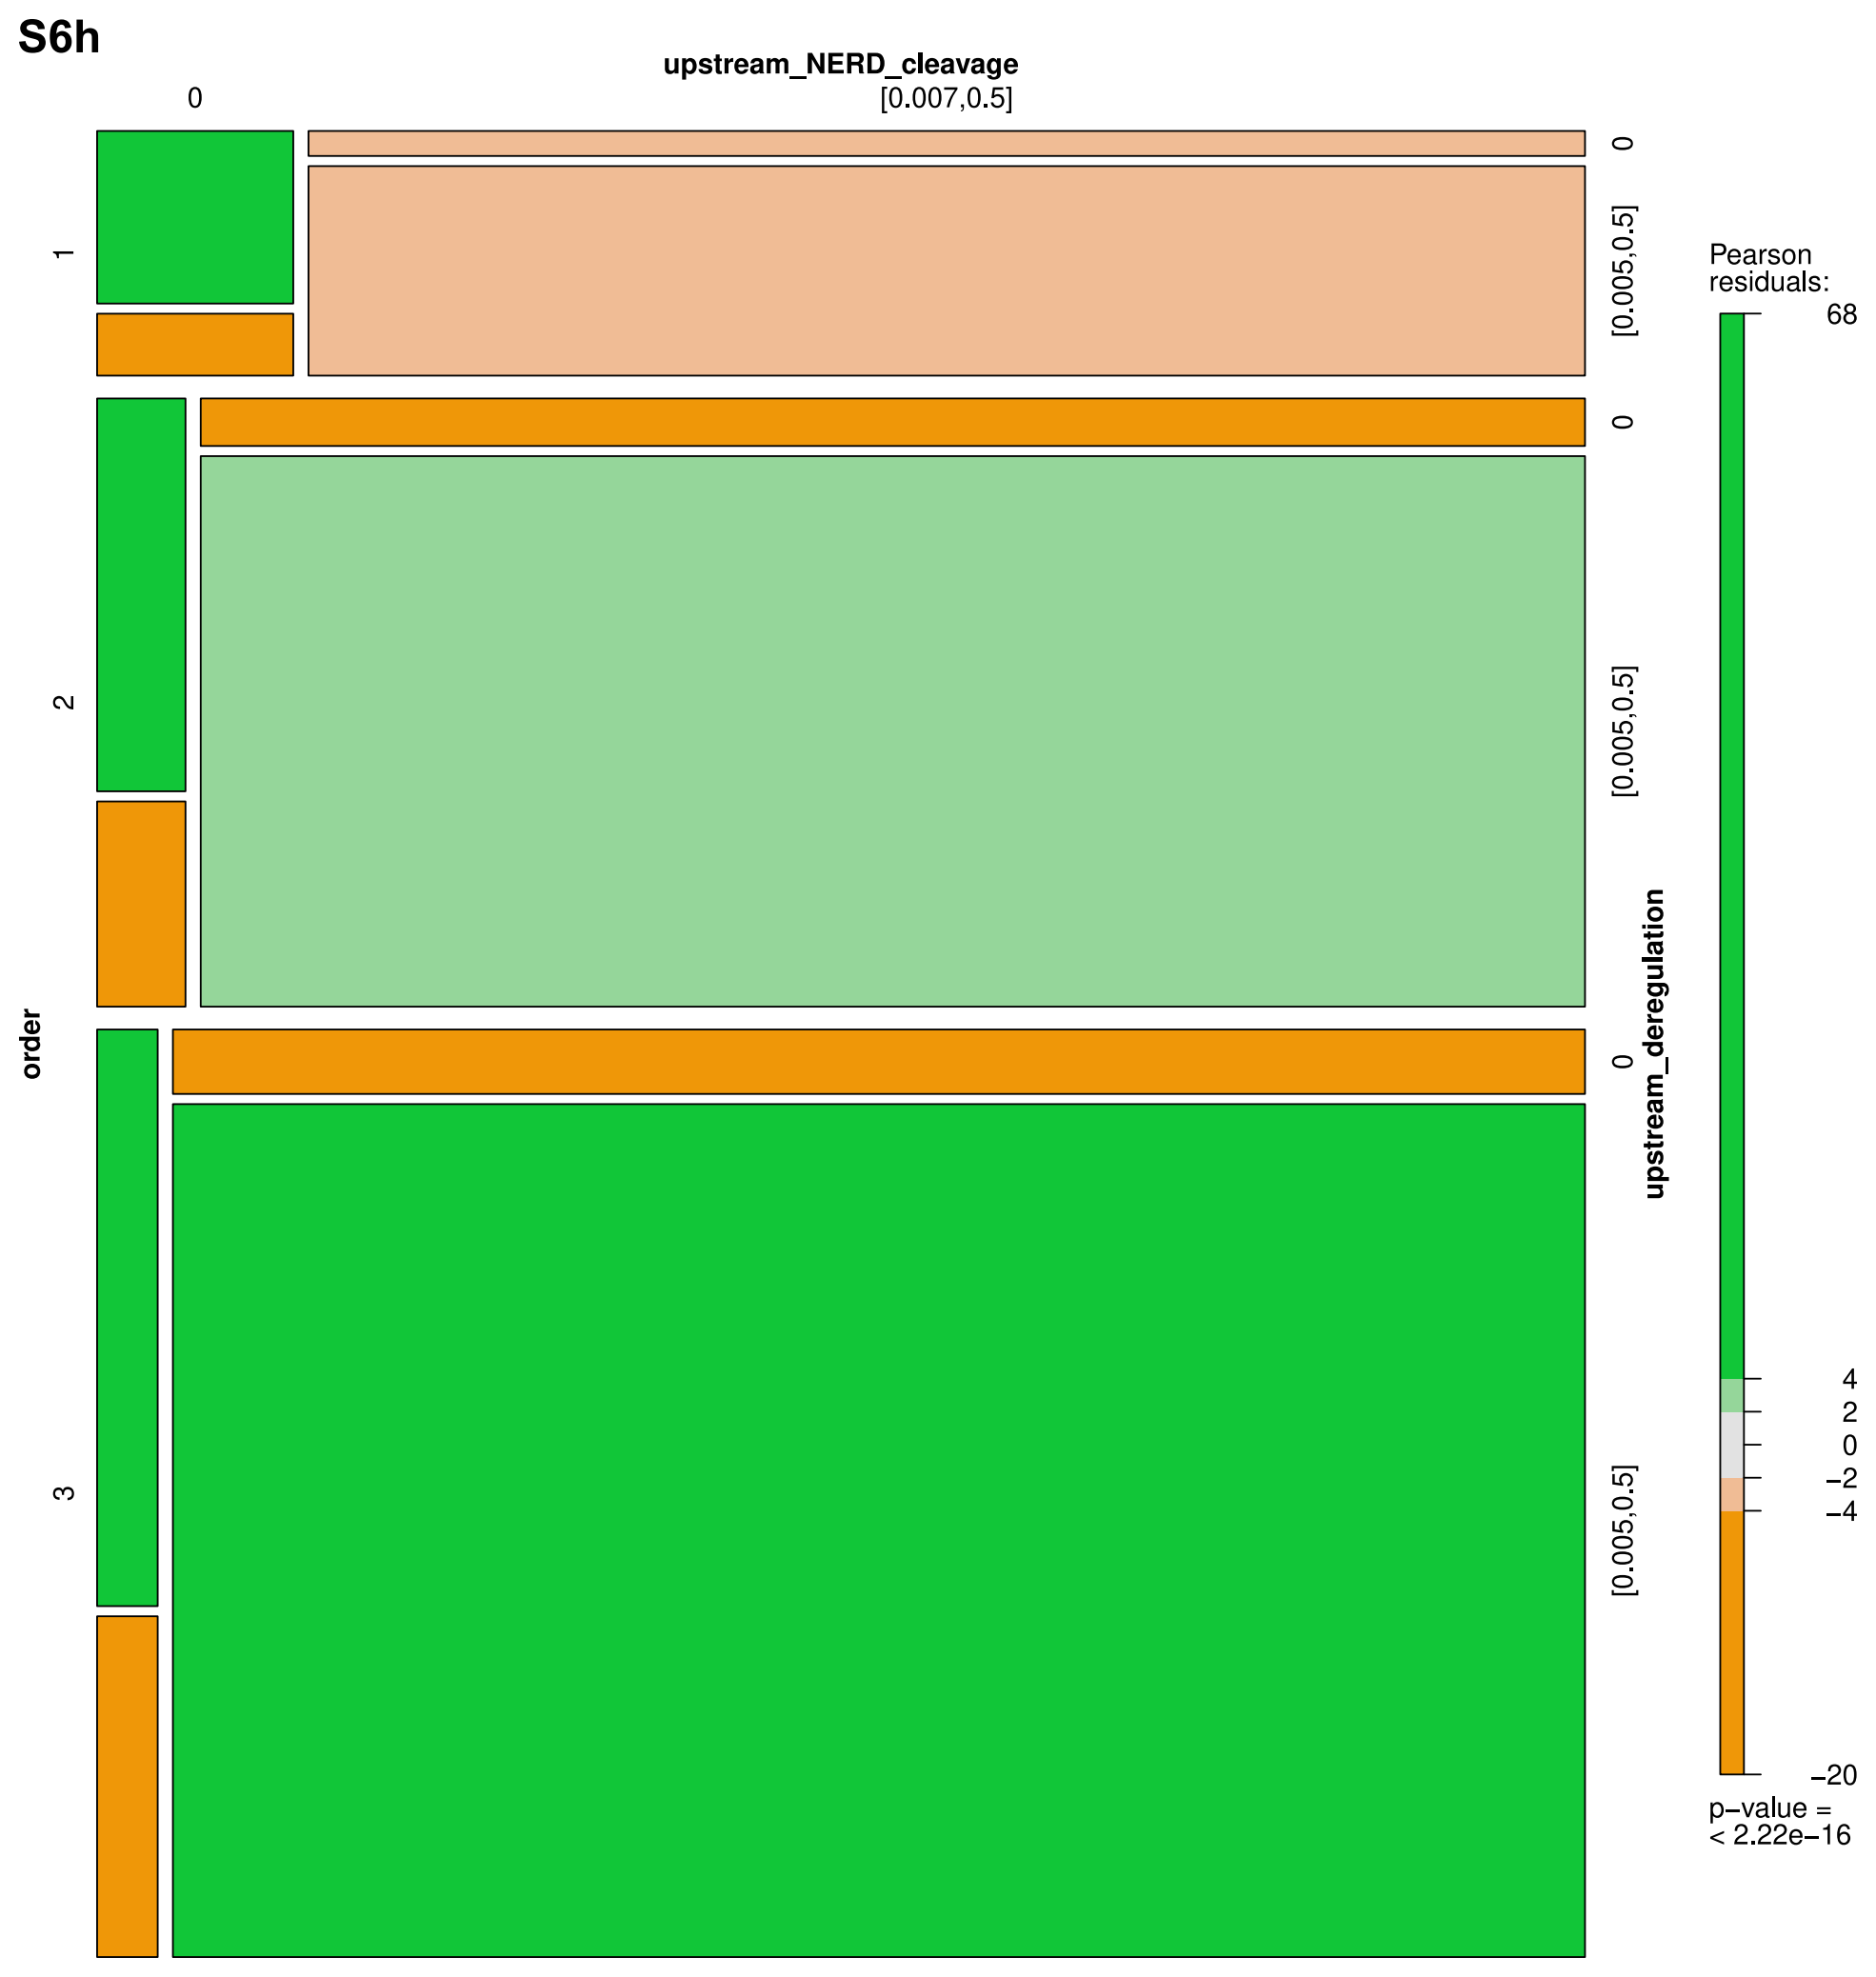

## Supplementary Fig. S6.

### Prediction of direct and indirect DEK1 targets.

**S6a. Scatter plot of protein length vs. number of predicted calpain cleavage sites.** Overall site frequencies were scaled by the total protein length. Log-transformed, scaled overall site frequencies were clustered with k-means clustering into five site abundance level categories (SLC; point colors), representing: S0 = no; S1 = very few – few; S2 = few – medium; S3 = medium – many; S4 = many - very many predicted sites. These labels were obtained by ranking the resulting k-means clusters by their centroid/mean number of predicted cleavage sites.

**S6b. PCA of calpain cleavage site predictions.** Overall site frequency and individual NERD site type frequencies (see Fig. 3a and Methods) were scaled by the total protein length and analyzed by PCA. Eigenvector plot of the first two principal components. While overall site frequency and primary acetylated sites contribute only to the first dimension, the second dimension separates the NERD-like signatures.

**S6c. Model-based clustering of calpain cleavage site predictions.** Line plot depicting the Bayesian Information Criterion vs. the number of resulting clusters (components) using different clustering models. The VVE model resulted in the optimal BIC.

**S6d. Optimal model-based clustering (VVE model) of calpain cleavage site predictions.** Cluster scatter plot of the first two principal components of a PCA of calpain cleavage site classifications for *P. patens* proteins.

**S6e. Fractions of NERD-like cleavages among the VVE clusters color-coded by the overall abundance level of predicted sites.** Box-whisker plots depicting the distribution of the relative proportion of NERD-like cleavages. Proteins with no predicted cleavages were represented as 1. Color-coding according to five site abundance level categories (SLC; point colors), representing: S0 = no; S1 = very few – few; S2 = few – medium; S3 = medium – many; S4 = many - very many predicted sites. X-axis corresponds to the three identified clusters obtained by model-based clustering via VVE.

**S6f. Fractions of NERD-like cleavages among the VVE clusters.** Box-whisker plots depicting the distribution of the relative proportion of NERD-like cleavages. Proteins with no predicted cleavages were represented as 0. Color-coding based on VV3 clustering.

**S6g. Absolute deregulation of subnetworks in DEK1 mutants.** Box-whisker plots depicting the distribution of the cumulative level of deregulation of genes with significantly altered expression levels in the mutants encoded by the five DEK1-controlled subnetworks. The levels of deregulation were represented by the sum of the  $\chi^2$  test statistic of the likelihood ratio tests (LRTs) comparing wild type vs.  $\Delta dek1$ , *oex1* vs. wild type and  $\Delta dek1$  vs. *oex1* employing it in the sense of an absolute, cumulative effect size. Fill-color depicts subnetwork affiliation.

**S6h. Regulatory cascades demonstrate consistent deregulation patterns.** Mosaic plot or *Marimekko diagram* depicting the three-way cross-tabulation of three three factorial variables: left axis – order of the regulon i.e. 1st order: TF→target; 2nd: TF→TF→target and 3rd: TF→TF→TF→target. Upper and left axis represent binary factors representing the binary status of their upstream regulon with respect to predicted levels of DEK1 control.

Upper axis – upstream\_NERD\_cleavage – i.e. predicted direct DEK1 cleavage targets. Right axis - indirect DEK1 targets i.e. deregulation of upstream TFs. Binary status defines whether the regulon comprises TFs predicted direct (x) or indirect (y) DEK1 targets (> 0% of the TFs) or not (= 0% TFs). Boxes are colored based on Pearson residuals from a significant  $\chi^2$  test of the cross-table comparing the proportions of the three classes.

# S7a

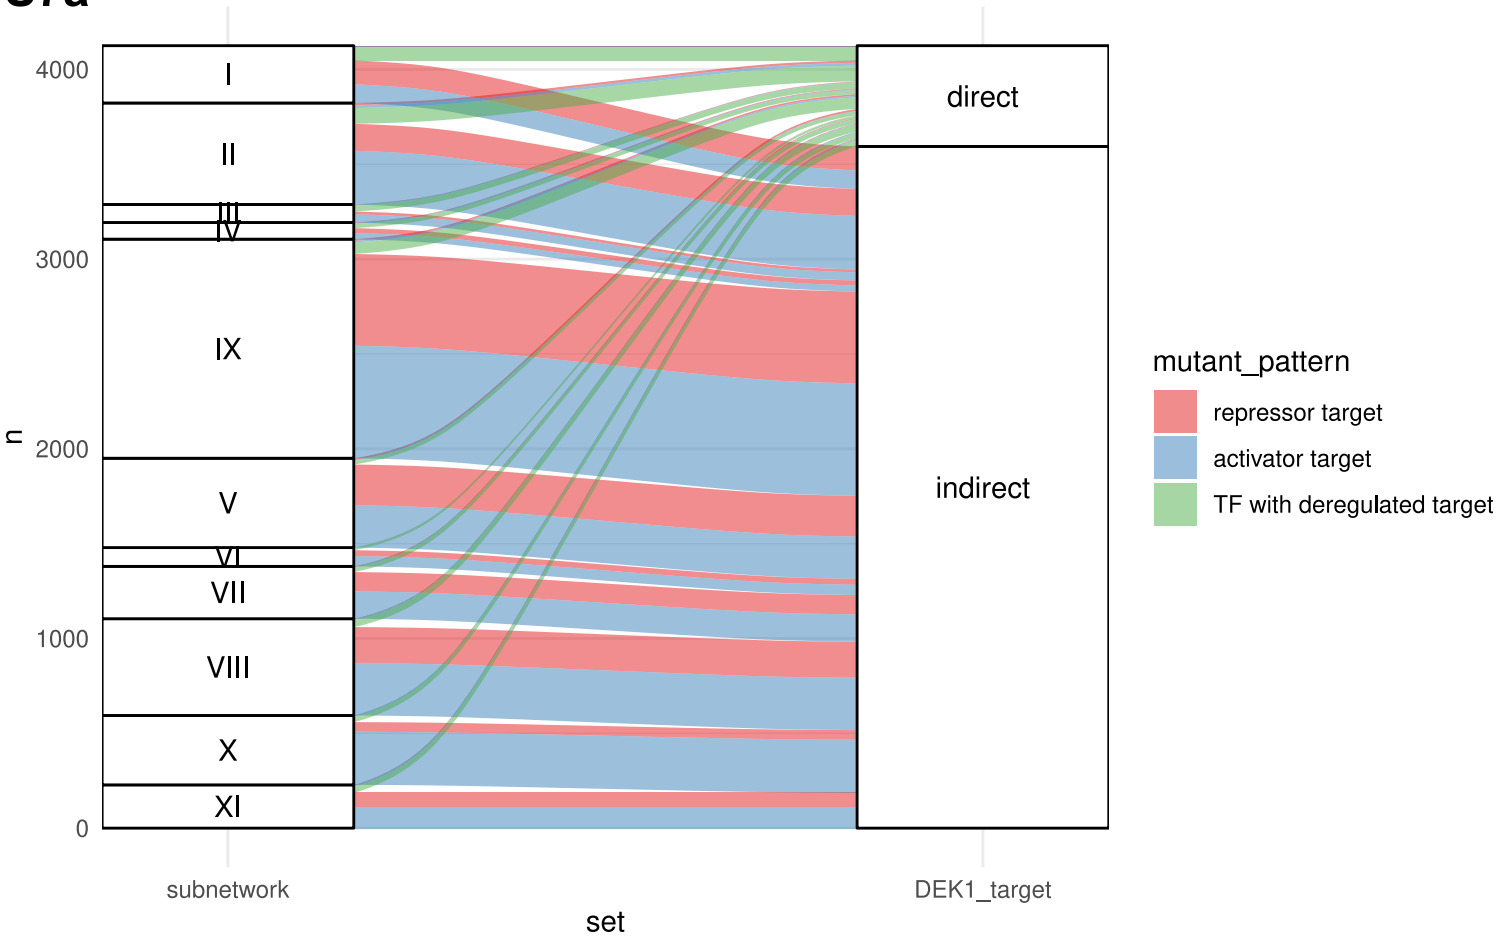



S7b

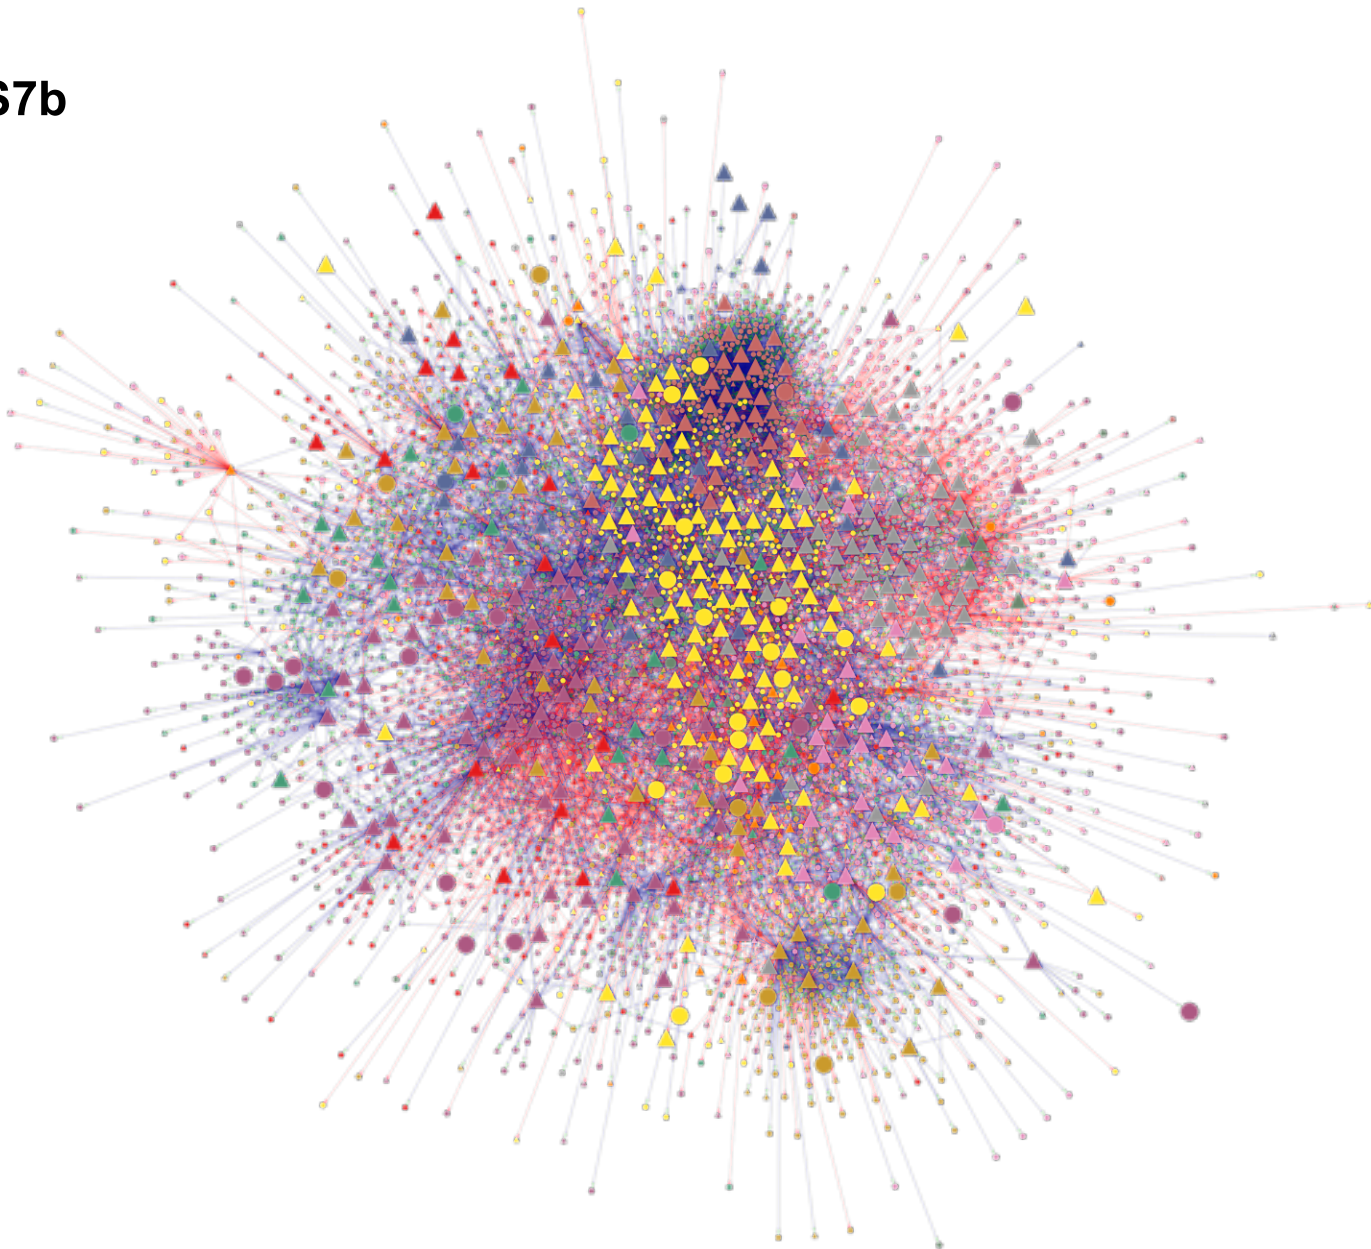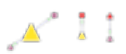

S7c

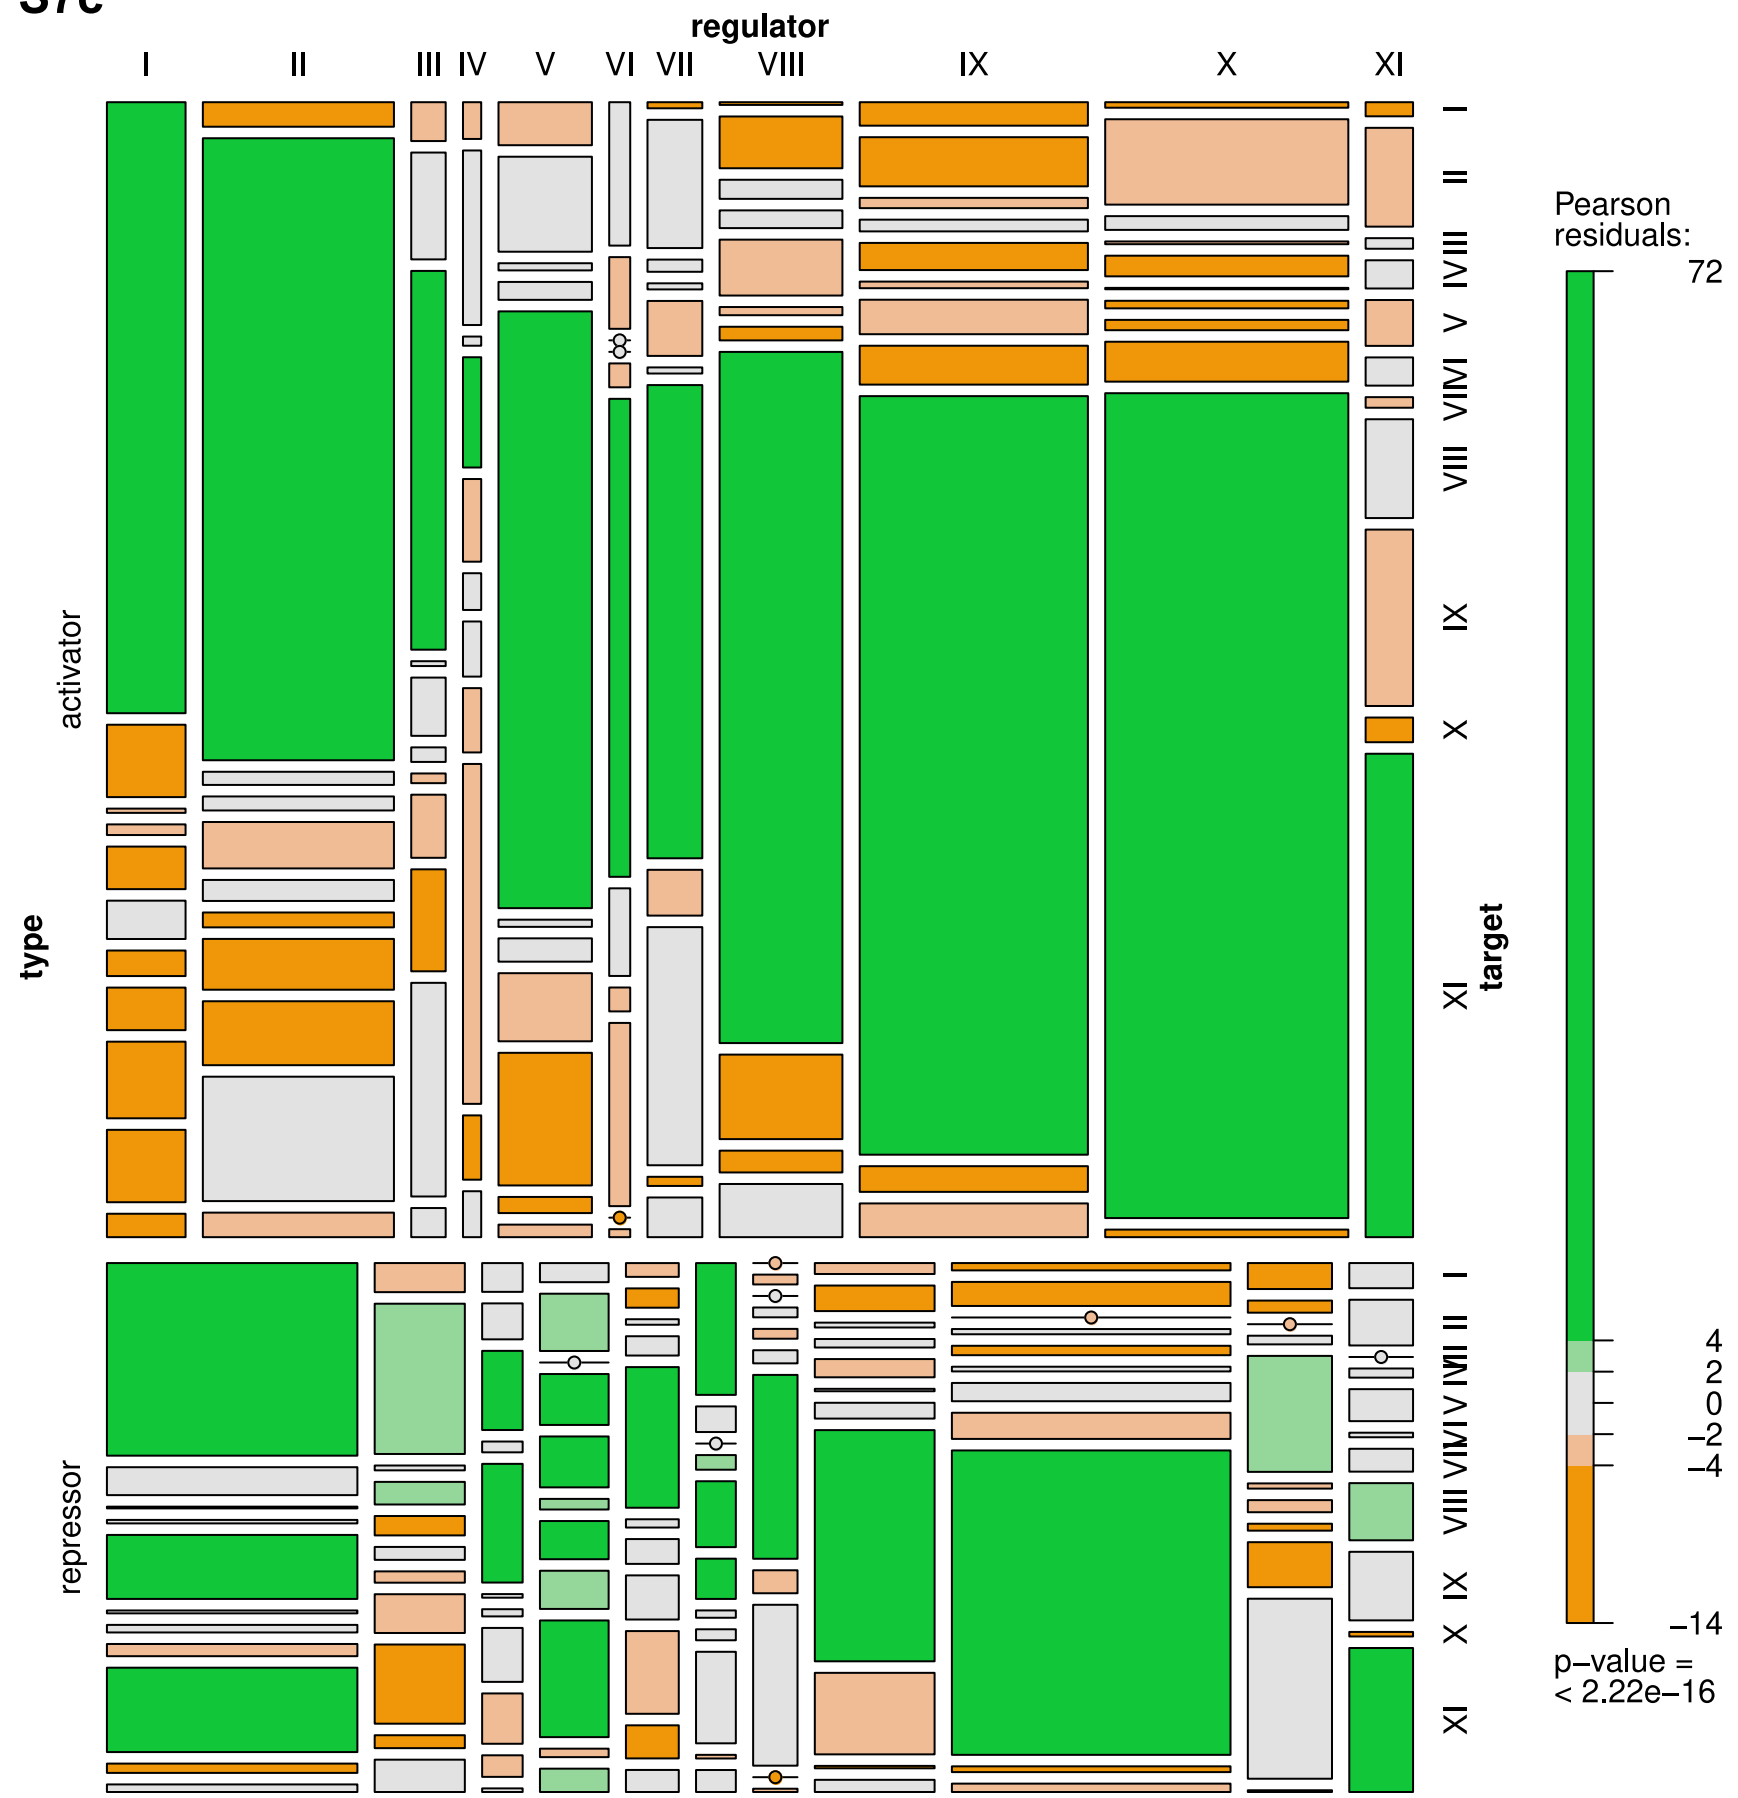

**Fig. S7.**

**Filtered set of predicted direct and indirect DEK1 targets.**

**S7a. Alluvial plot depicting the distribution of the filtered, predicted direct and indirect DEK1 targets among the 11 subnetworks.** Color-coding of bands reflects directionality of deregulation patterns in the mutant lines (see Fig. 1f for details). The green bands represent unaffected upstream TFs predicted to control the significantly deregulated target genes.

**S7b. Global network of the filtered, predicted direct and indirect DEK1 targets.** Network plot of the 4,125 direct and indirect DEK1 targets. Nodes are color-coded by subnetwork affiliation. Node size is relative to the nodes' local reaching centrality (master regulator TFs have largest). Predicted direct DEK1 cleavage targets are depicted as triangles. Indirect DEK1 targets as circles. Edges are color-coded by deregulation pattern i.e. type of DEK1-controlled regulatory interaction: *repressor targets* (red) and *activator targets* (blue).

**S7c. Distribution of intra- and inter-subnetwork regulatory interactions controlled by DEK1.** Mosaic plot or Marimekko diagram depicting the three-way cross-tabulation of three factorial variables: Left y-axis: mutant deregulation pattern i.e. type of regulatory interaction *repressor targets* and *activator targets*. Top x-axis: regulator subnetwork affiliation. Right x-axis: target subnetwork affiliation. Box size relative to the number of edges. Boxes are colored based on Pearson residuals from a significant  $\chi^2$  test of the cross-table (green: enrichment; orange: under-representation).

S8a

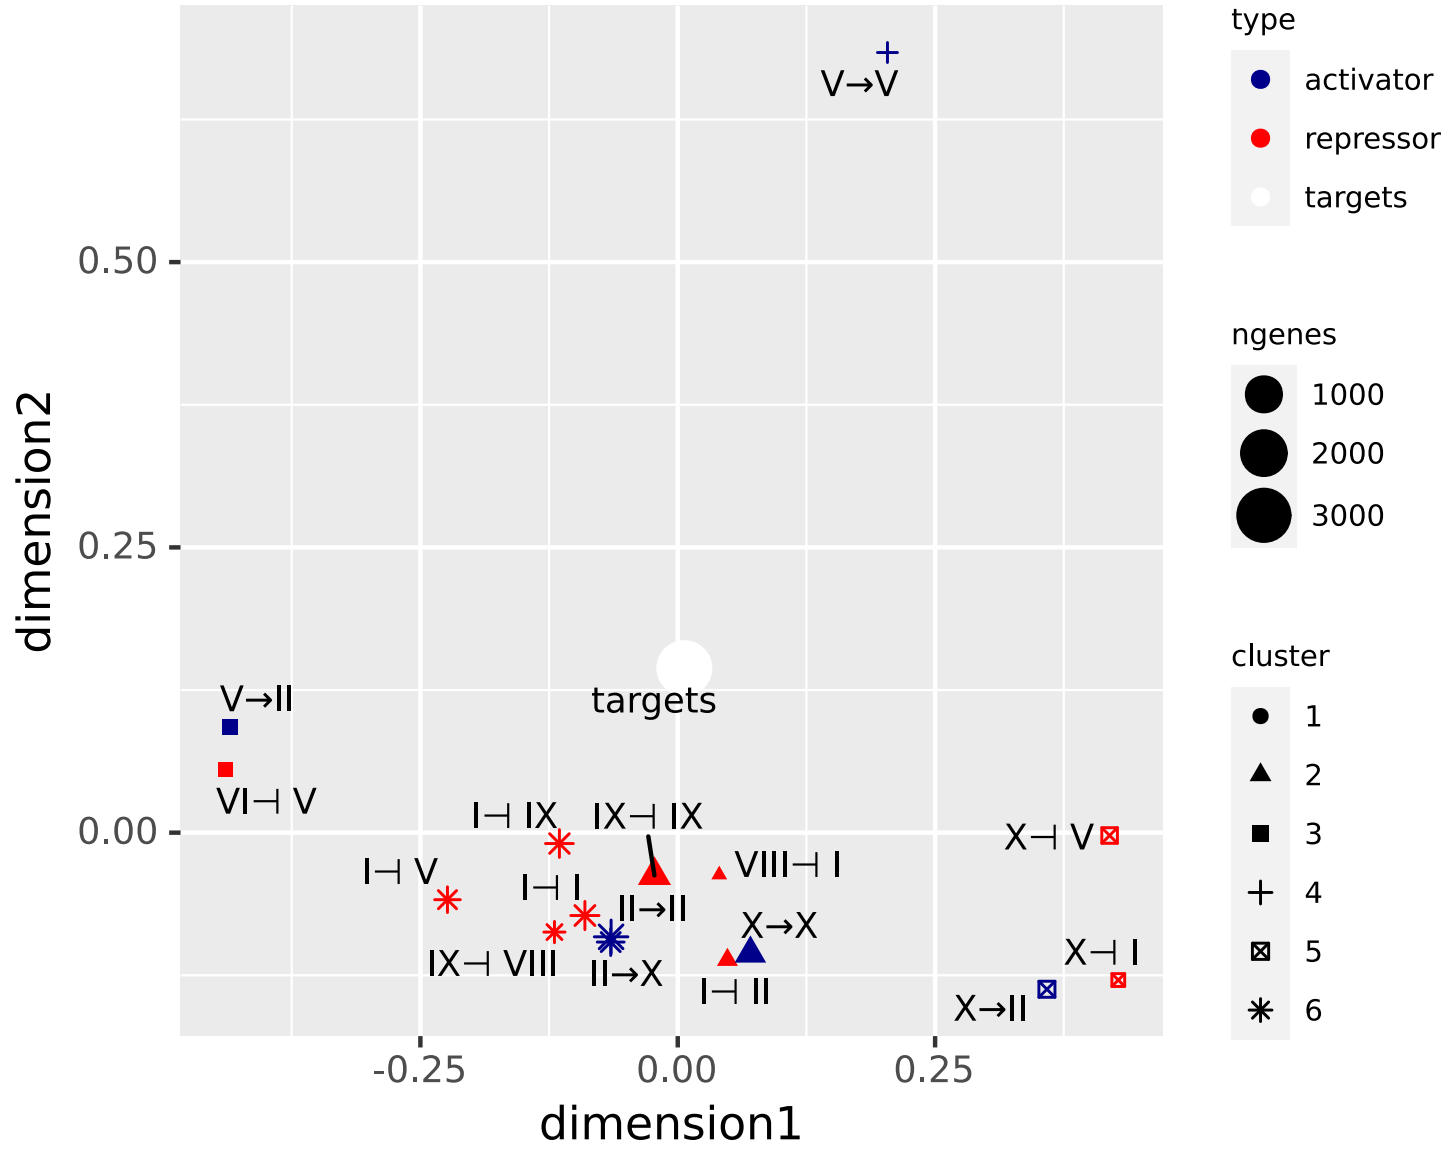

# S8b

## Model selection

Best model: EII | Optimal clusters: n = 6

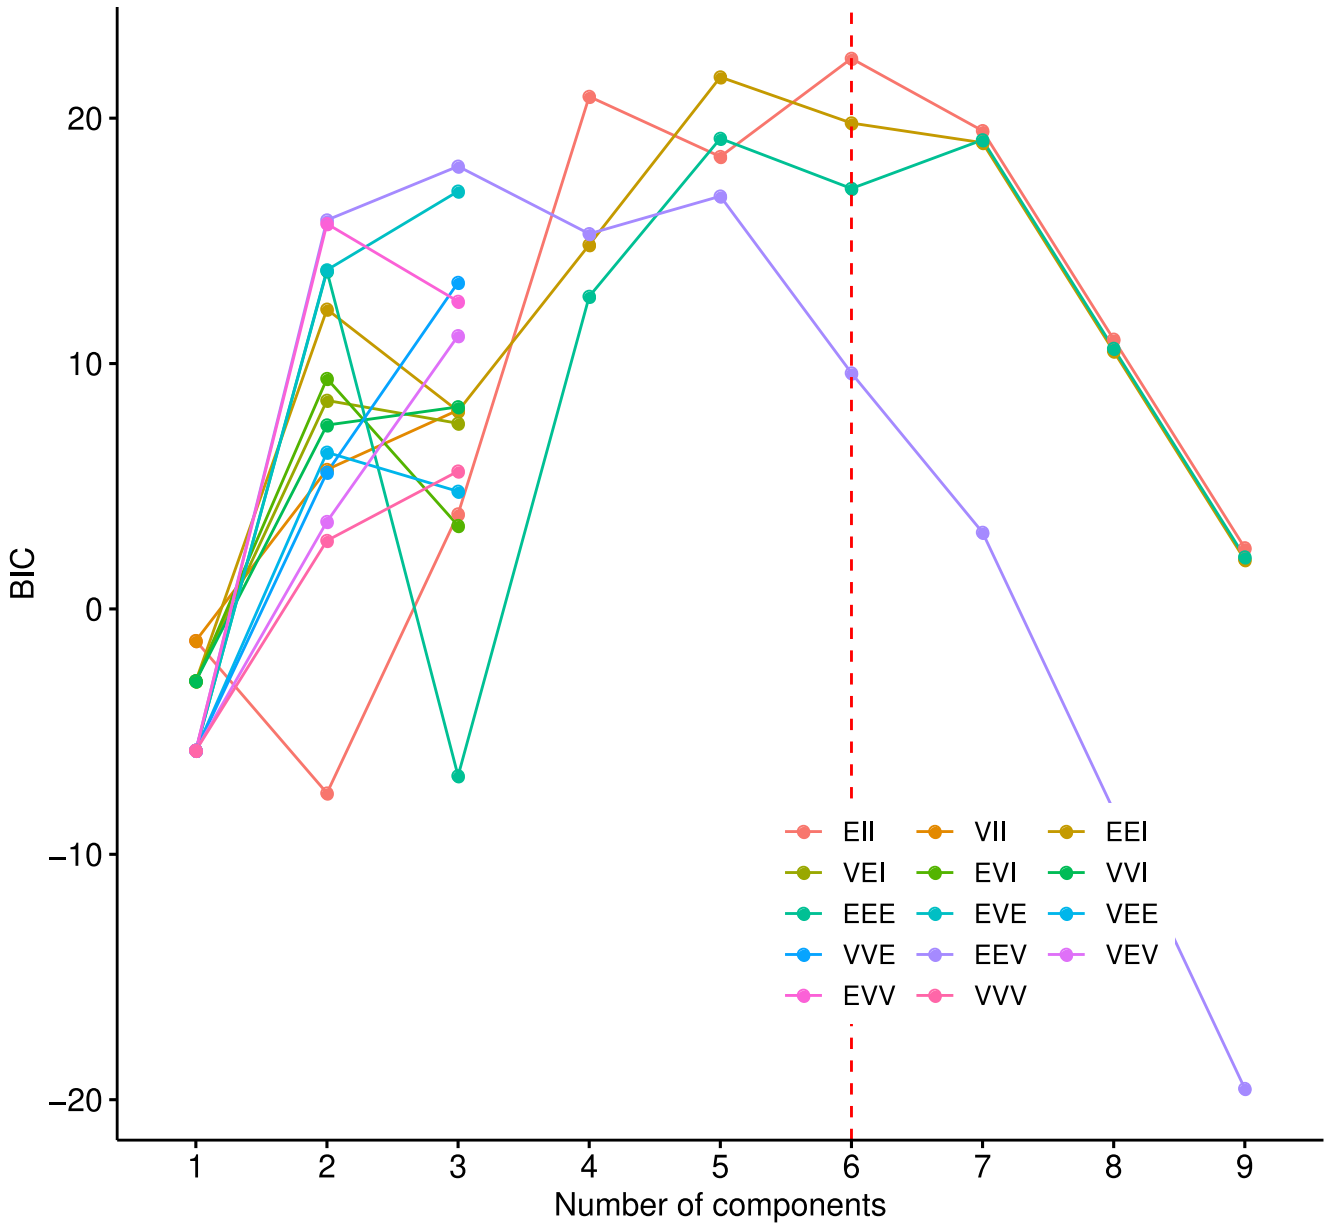

# S8c

Cluster plot  
Classification

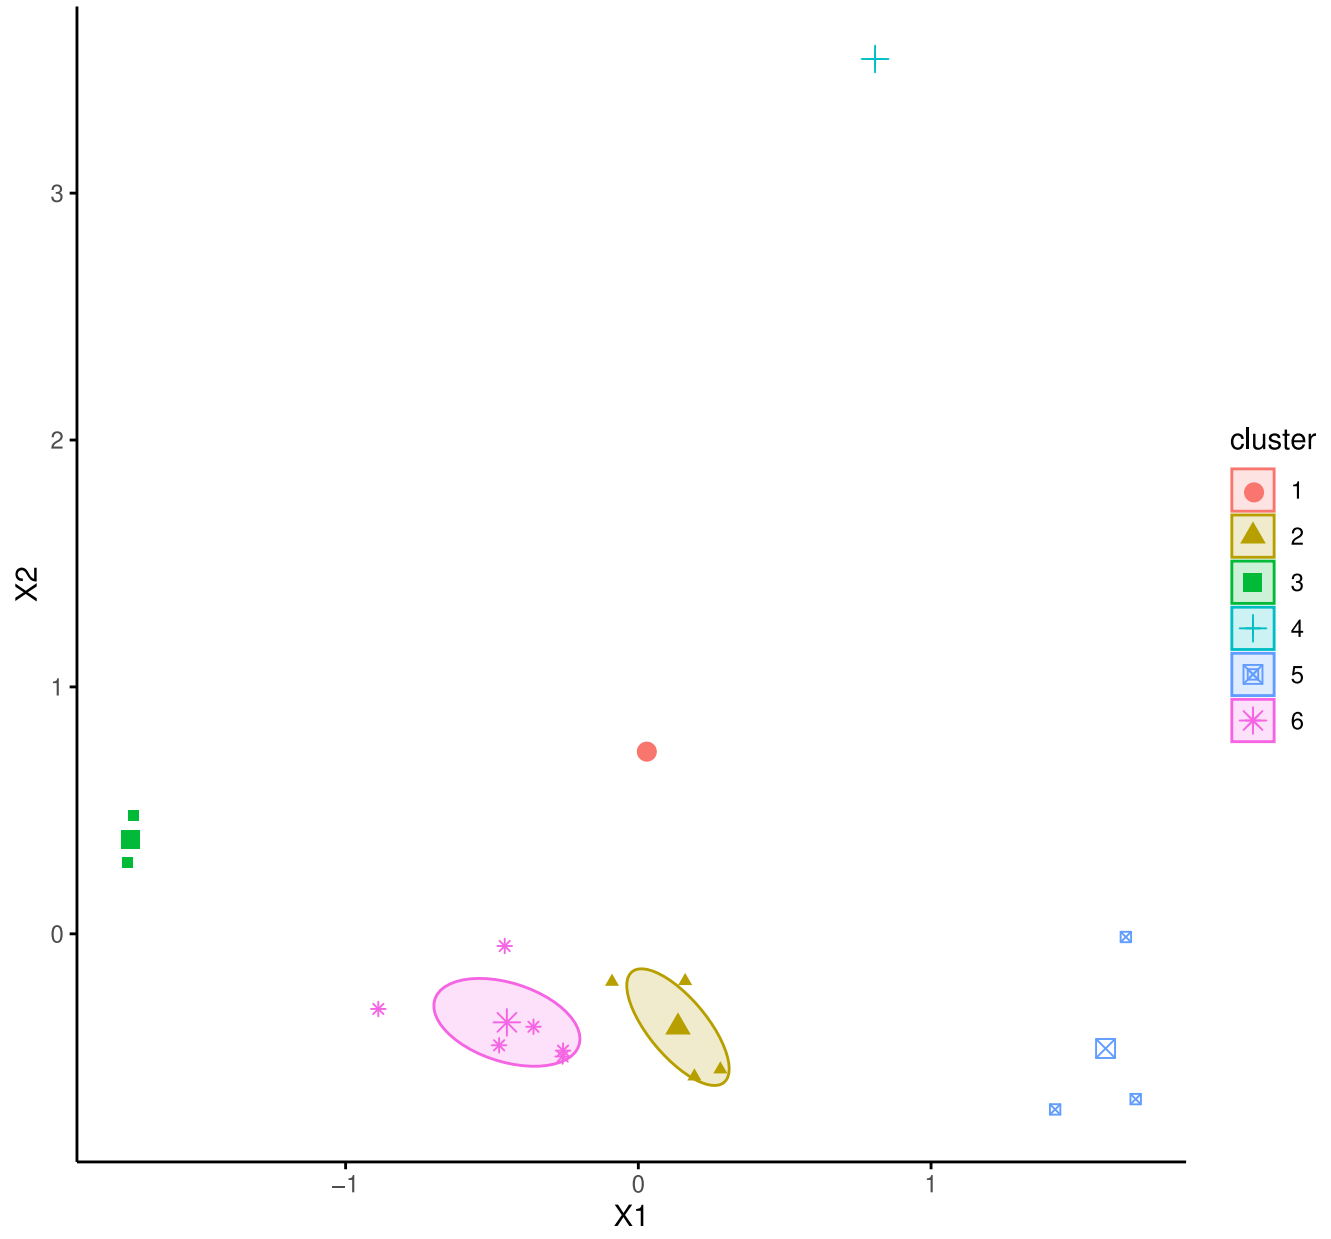

# S8d

## PO plant anatomical entity

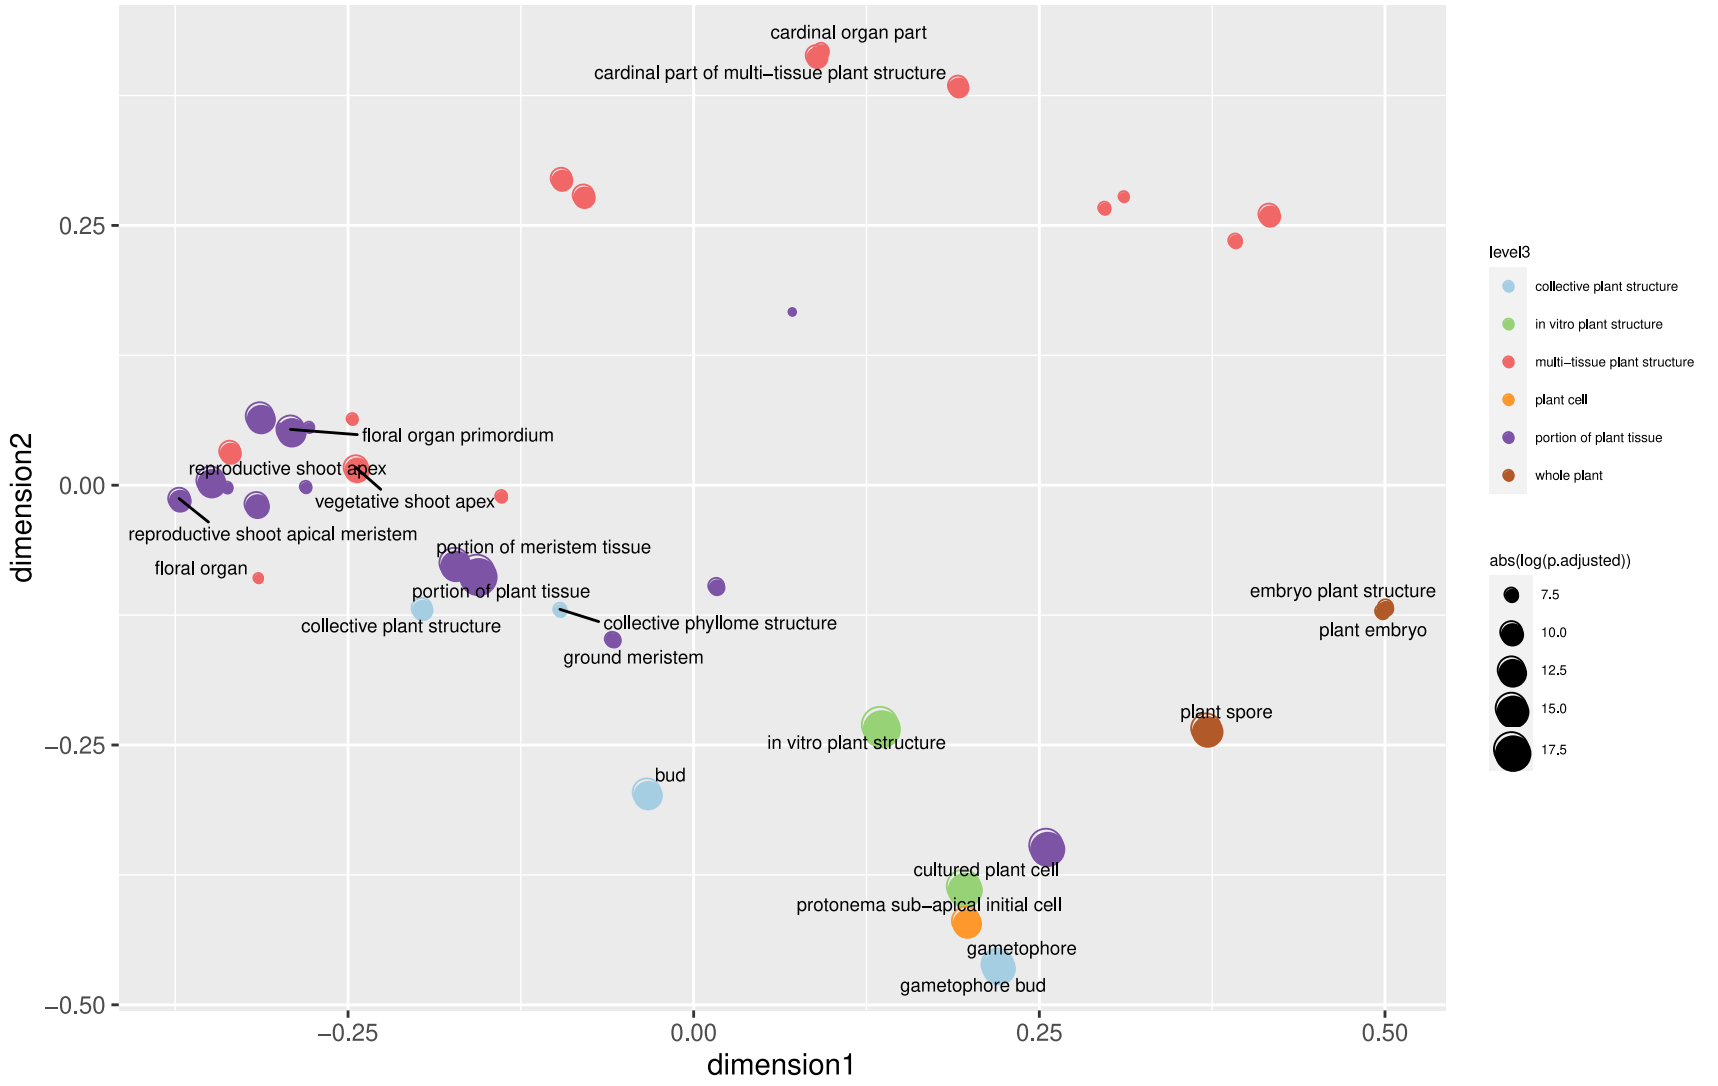

S8e

### GO biological\_process

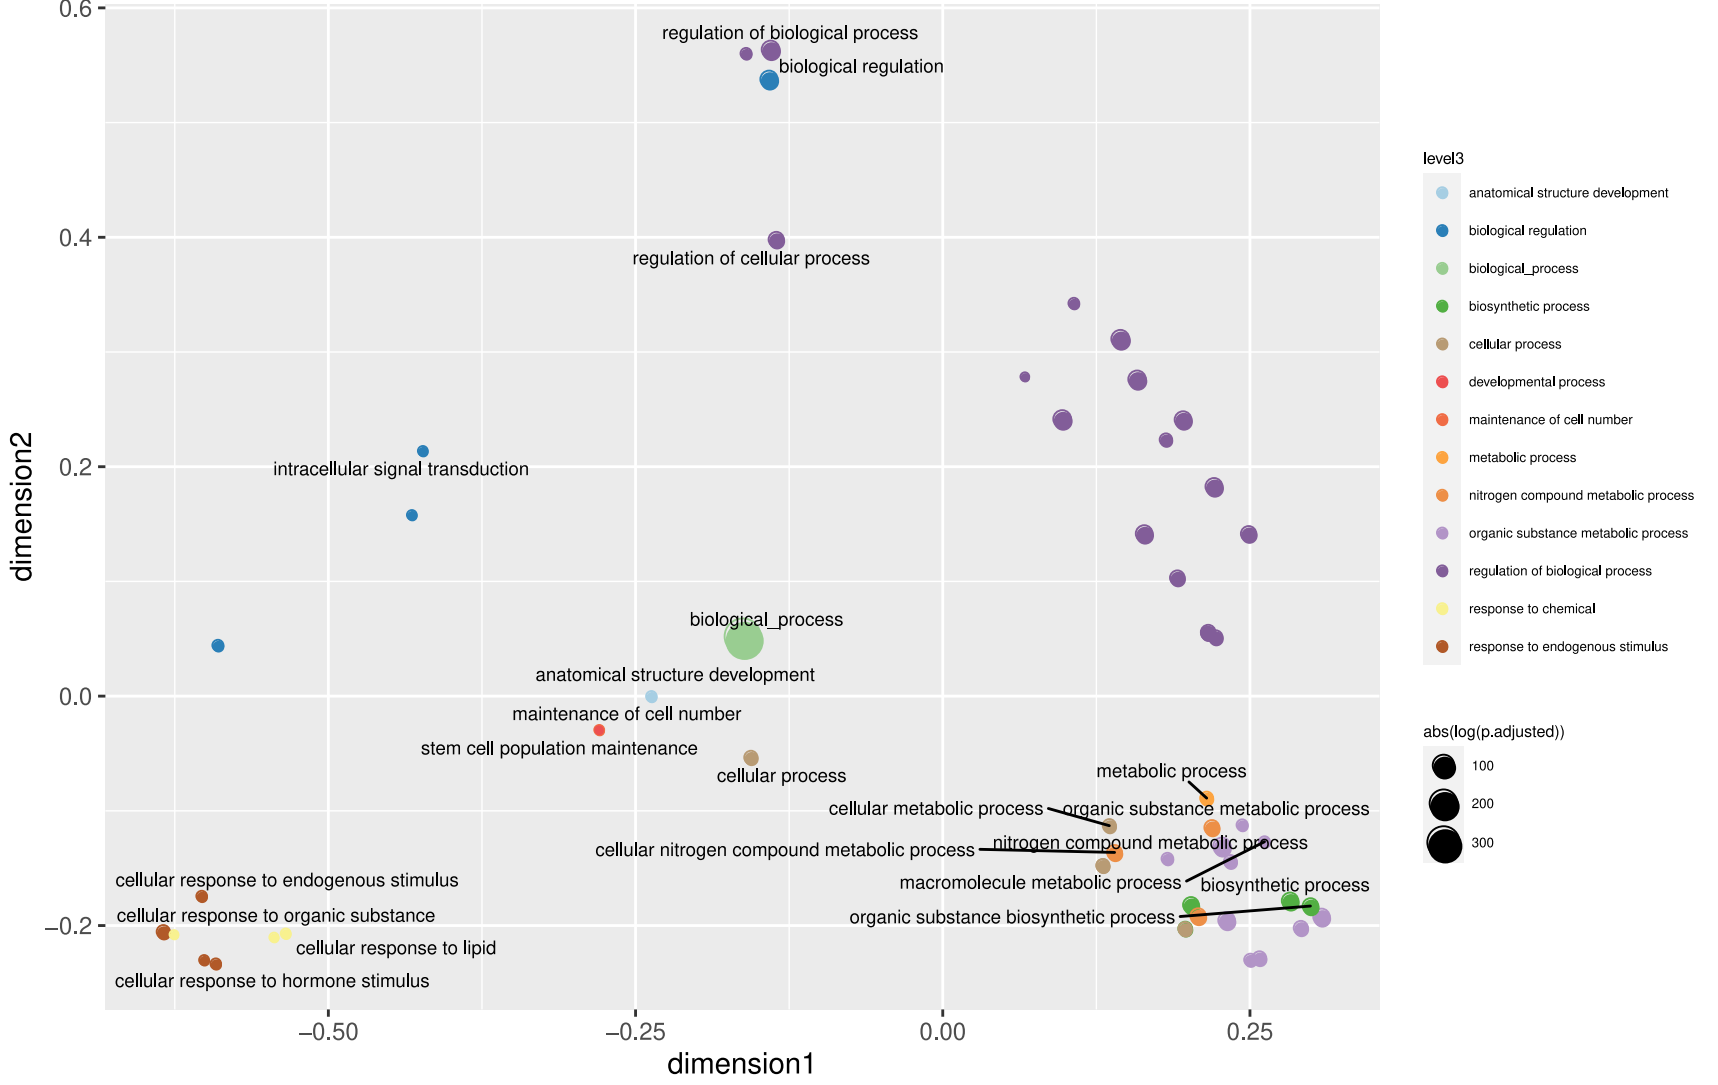



**Fig. S8.**

**Functional characterization of direct and indirect DEK1 targets by ontology analysis.**

**S8a. Semantic similarity of DEK1-controlled regulatory interactions.** Multidimensional scaling plot of a distance matrix derived by comparing enriched GO biological process terms between the sets of DEK1-controlled regulatory interactions within and between subnetworks using semantic similarity. Sets are depicted as symbols that represent one of six clusters of similar concepts and color-coded by deregulation pattern (DEK1-controlled *repressor* [red] or *activator* [blue] *target*). Point size is relative to the total number of genes in the set.

**S8b. Model-based clustering of DEK1-controlled regulatory interactions.** Line plot depicting the Bayesian Information Criterion vs. the number of resulting clusters (components) using different clustering models. The EII model with  $n = 6$  resulted in the optimal BIC.

**S8c. Optimal model-based clustering (EII model) of DEK1-controlled regulatory interactions.** Cluster scatter plot of a multidimensional scaling plot of the semantic similarity/distance matrix (see Panel S8a of the optimal EII model clustering analysis. Points are color-coded by cluster affiliation. Clusters with more than one gene set are depicted with ellipses depicting the variation around the cluster center (larger symbol of same color).

**S8d. and S8e. Automatically inferred representative key concepts of enriched (d) PO anatomical entity and (e) GO biological process for DEK1-controlled regulatory interactions.** Multidimensional scaling plot of a distance matrix derived by comparing enriched ontology terms from the respective ontology partition for the gene sets of DEK1-controlled regulatory interactions. All enriched terms are represented by a point that is scaled by the number of genes with that term in the set. For groups of similar concepts (aggregated by level 3 ontology terms), terms were ranked in ascending order by information content and log FDR value of term enrichment.

**S9**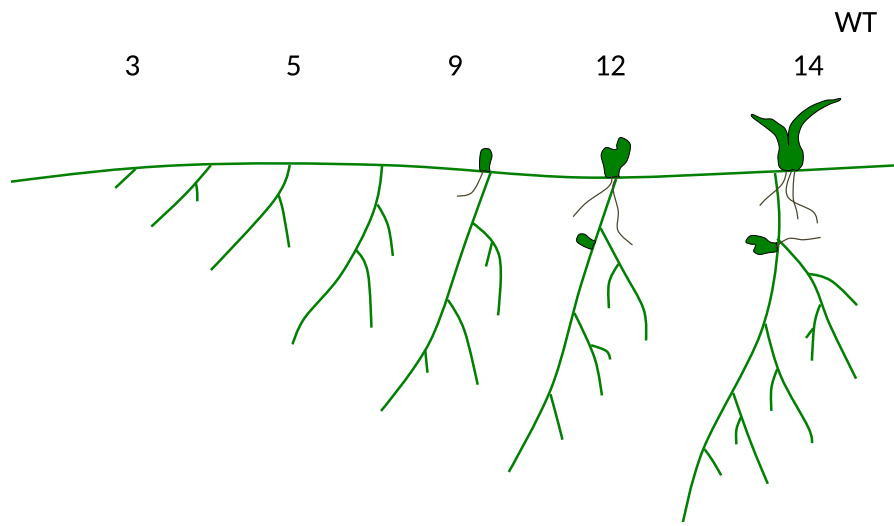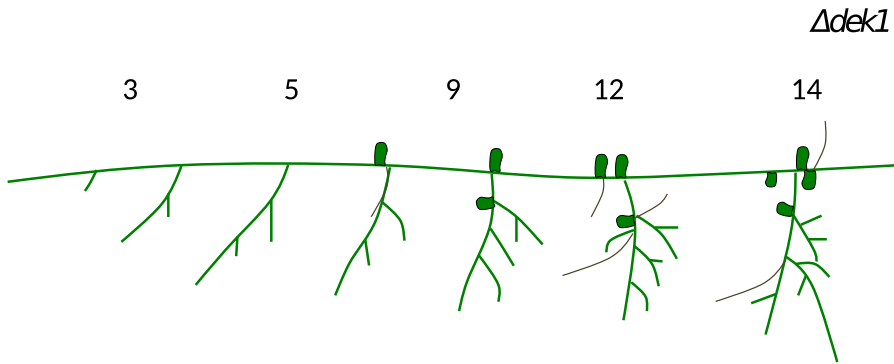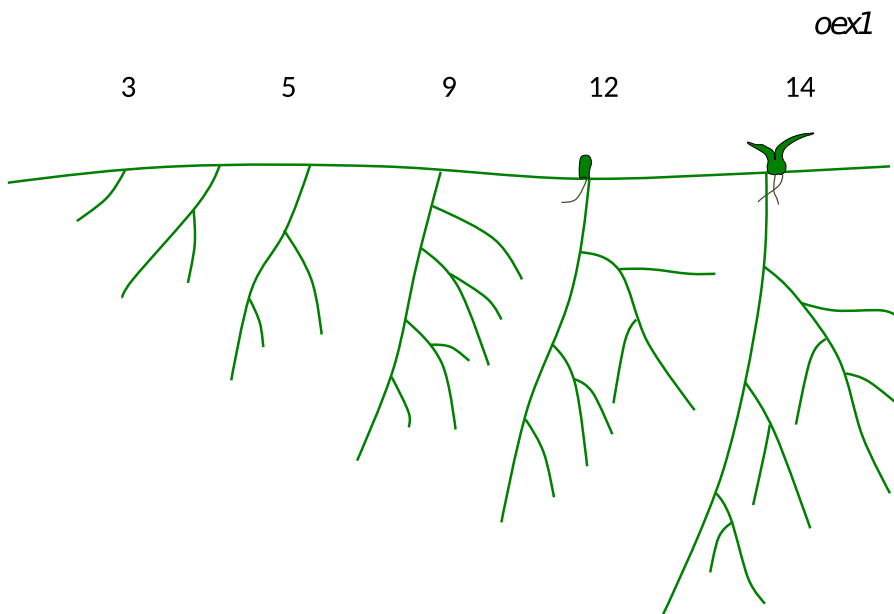

|  | <b>primary filaments</b> | <b>side branches</b> | <b>bud initiation</b> | <b>gametophore development</b> |
|--|--------------------------|----------------------|-----------------------|--------------------------------|
|--|--------------------------|----------------------|-----------------------|--------------------------------|

*Δdek1* normal

reduced elongation

increased

arrested

*oex1* elongated

increased elongation

reduced

normal

**Fig. S9.**

**Major phenotypes of the *DEK1* deletion and overexpression mutants.** Schematic overview of *P. patens* gametophyte development in wild type (WT), *DEK1* deletion mutant ( $\Delta dek1$ ) and *DEK1* Linker-Calpain overexpressing line (*oex1*). Numbers indicate days after culture initiation. Primary filament is oriented horizontally with side-branches progressively forming secondary filaments positioned vertically.  $\Delta dek1$  mutant shows reduced elongation of secondary filaments and accelerated gametophore bud initiation when compared to WT. Developmentally arrested  $\Delta dek1$  buds are often formed in clusters. In contrast to  $\Delta dek1$ , *oex1* shows increased elongation of secondary filaments and delayed gametophore bud initiation.

a

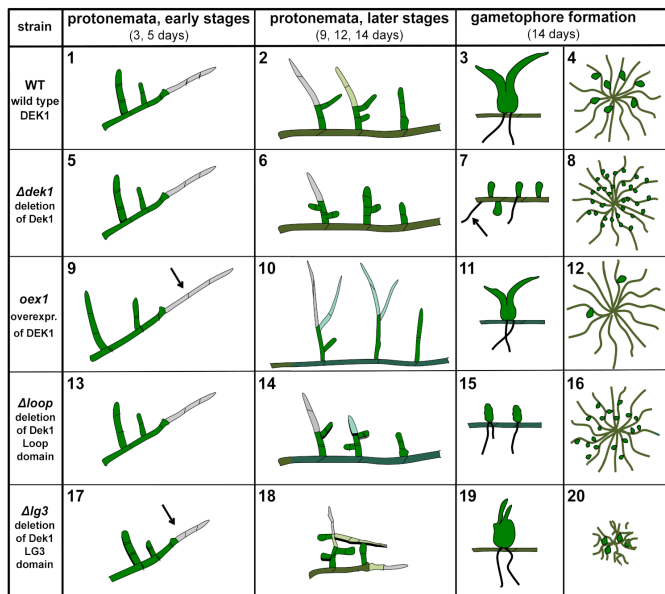

b

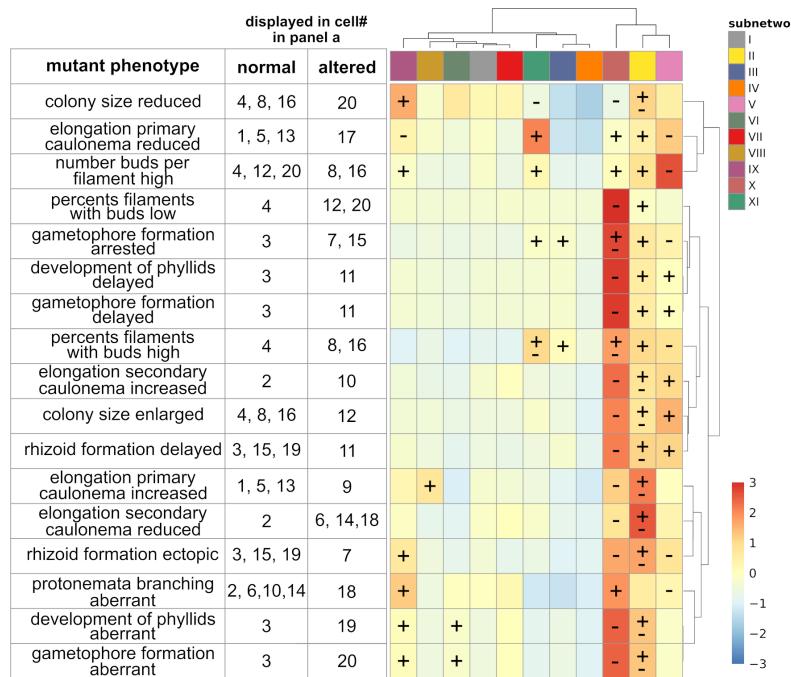

c

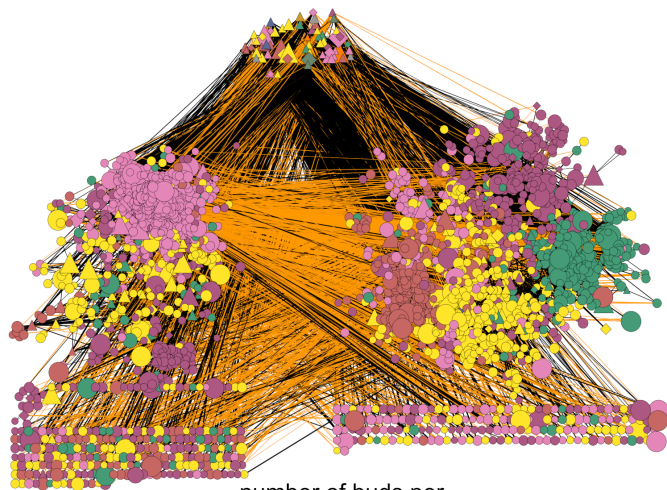

- V ● II ● IX ● X ● XI enriched subnetworks
- VI ● III ● I ● VII ● IV upstream regulators

d

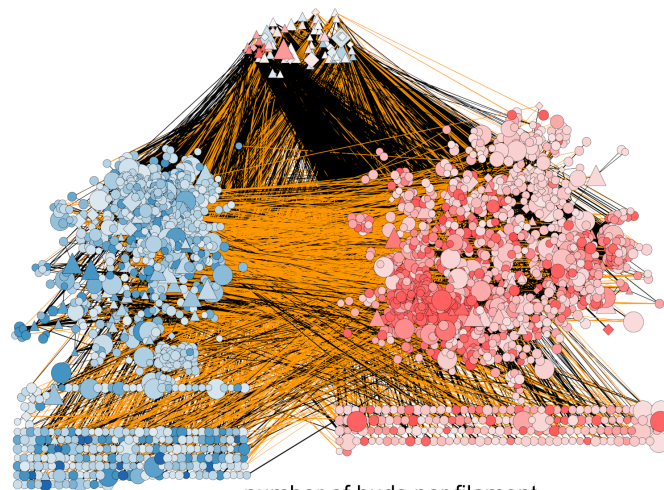

- WT, *oex1*,  $\Delta lg3$  (4, 12, 20)
- $\Delta dek1$ ,  $\Delta loop$  (8, 16)

# S10e

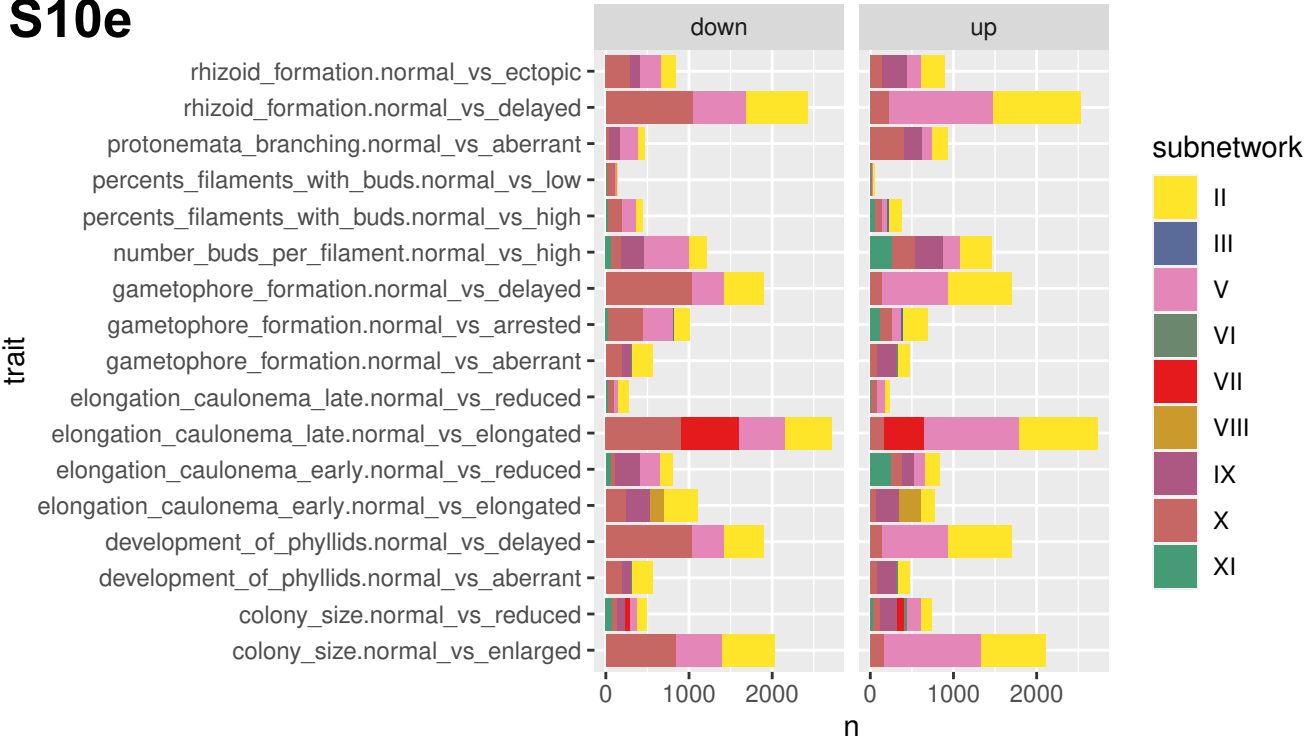

# S10f

Intersection Size

1150  
827  
770  
429  
367  
314  
285  
204  
182  
169  
144  
144  
131  
131  
122  
106  
98  
92  
88  
85  
84  
81  
80  
75  
67  
66  
66  
64  
55  
54  
50  
50  
48  
48  
46  
45  
43  
41  
39  
38  
37  
37  
36  
35  
33  
31  
30  
30  
28  
27

- percents\_filaments\_with\_buds.normal\_vs\_low
- elongation\_caulonema\_late.normal\_vs\_reduced
- percents\_filaments\_with\_buds.normal\_vs\_high
- development\_of\_phyllids.normal\_vs\_aberrant
- gametophore\_formation.normal\_vs\_aberrant
- colony\_size.normal\_vs\_reduced
- protonemata\_branching.normal\_vs\_aberrant
- elongation\_caulonema\_early.normal\_vs\_reduced
- gametophore\_formation.normal\_vs\_arrested
- rhizoid\_formation.normal\_vs\_ectopic
- elongation\_caulonema\_early.normal\_vs\_elongated
- number\_buds\_per\_filament.normal\_vs\_high
- development\_of\_phyllids.normal\_vs\_delayed
- gametophore\_formation.normal\_vs\_delayed
- colony\_size.normal\_vs\_enlarged
- rhizoid\_formation.normal\_vs\_delayed
- elongation\_caulonema\_late.normal\_vs\_elongated

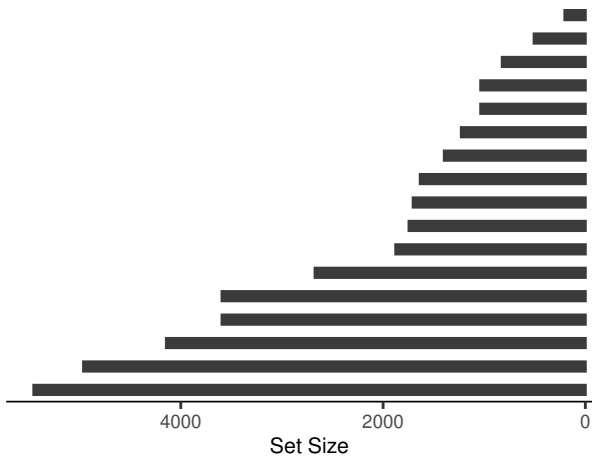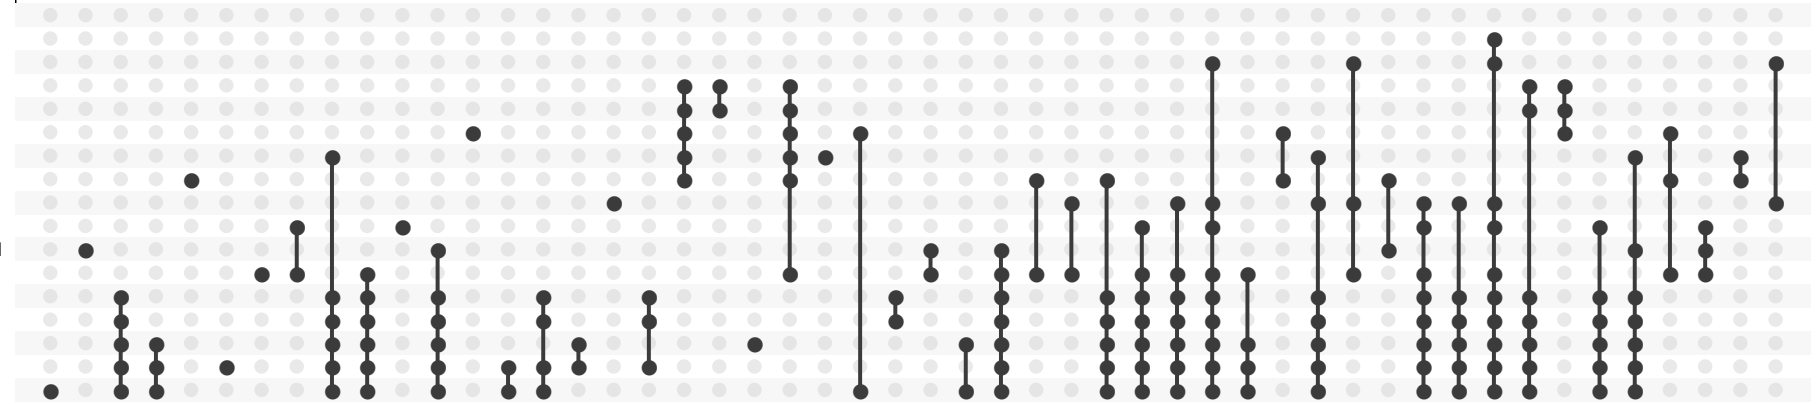

# S10g

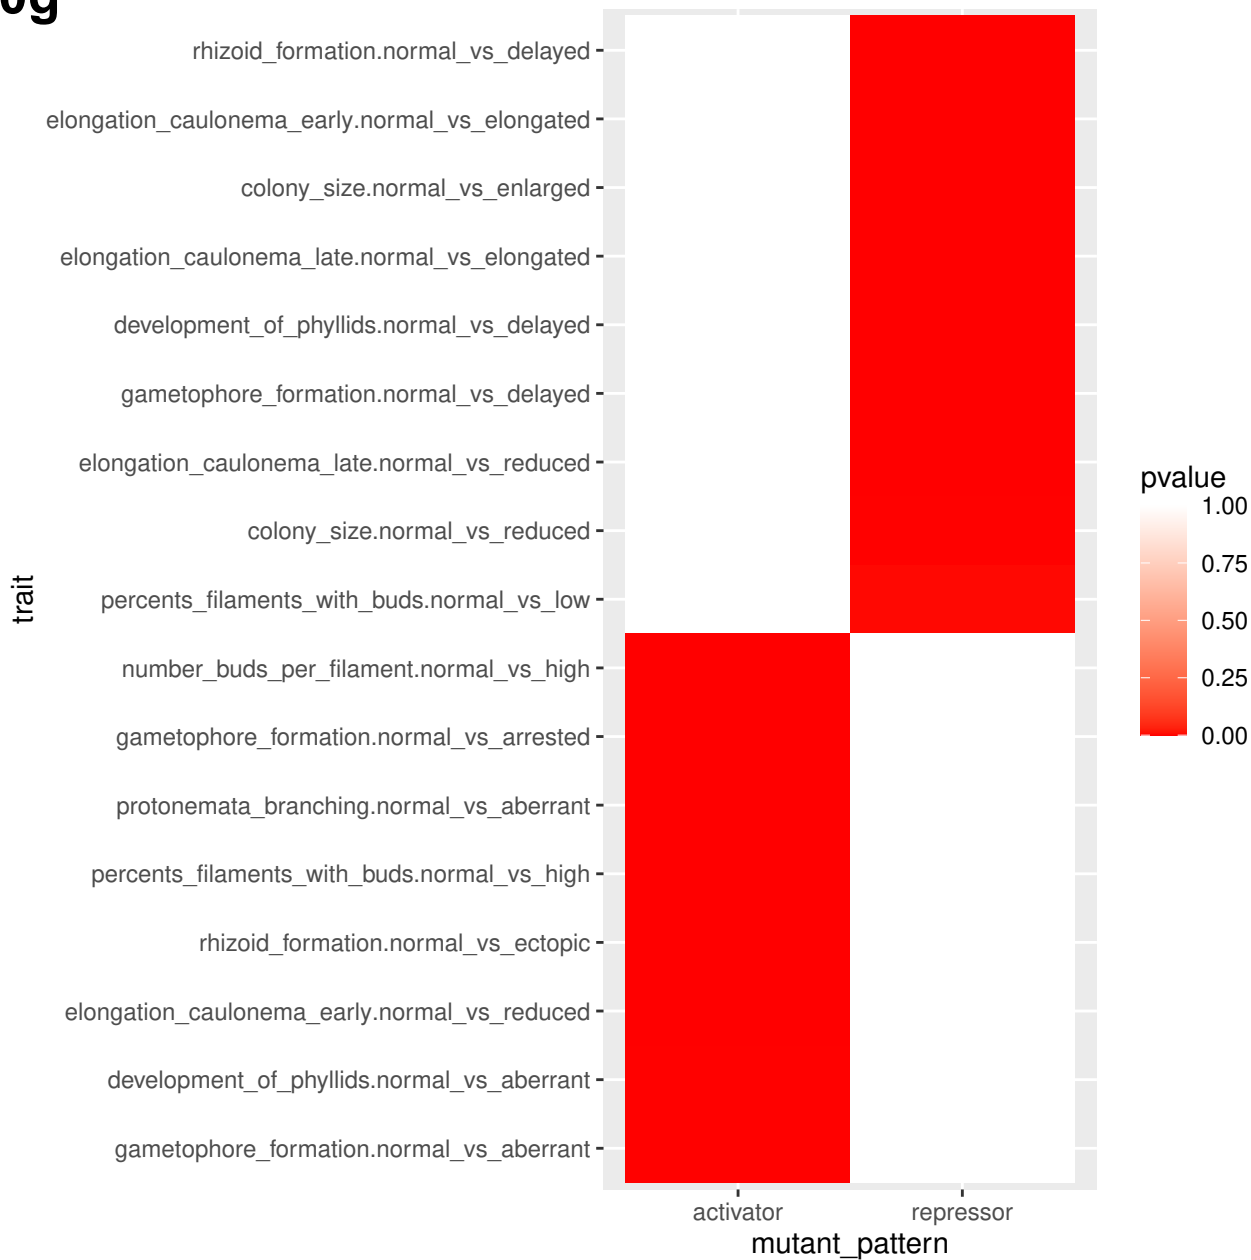

# S10h

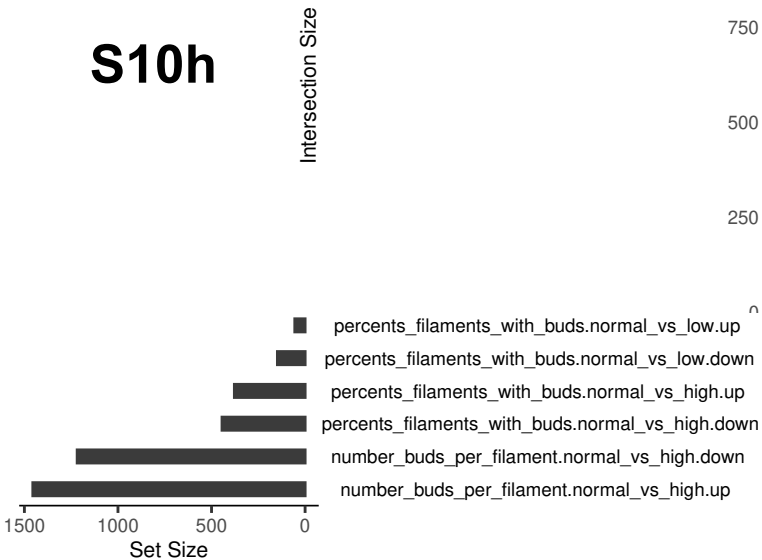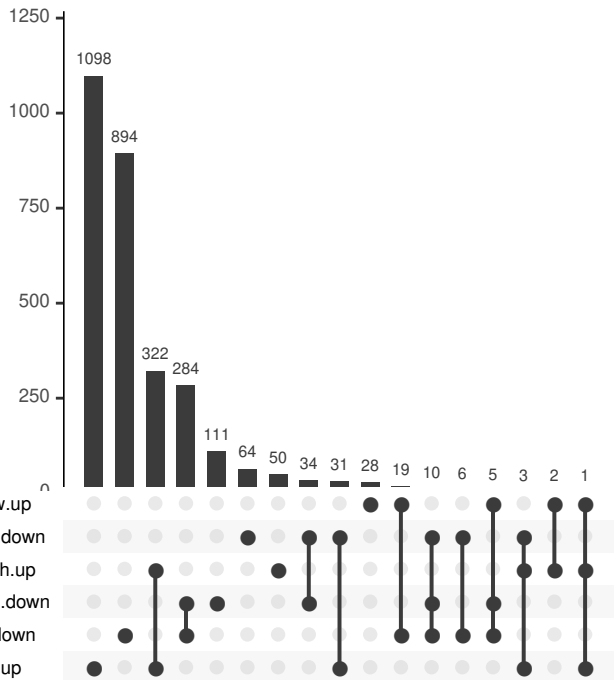





# S10j

## I

## II

## VII

## IV

## IX

## VI

## VIII

## X

## III

## XI

## V

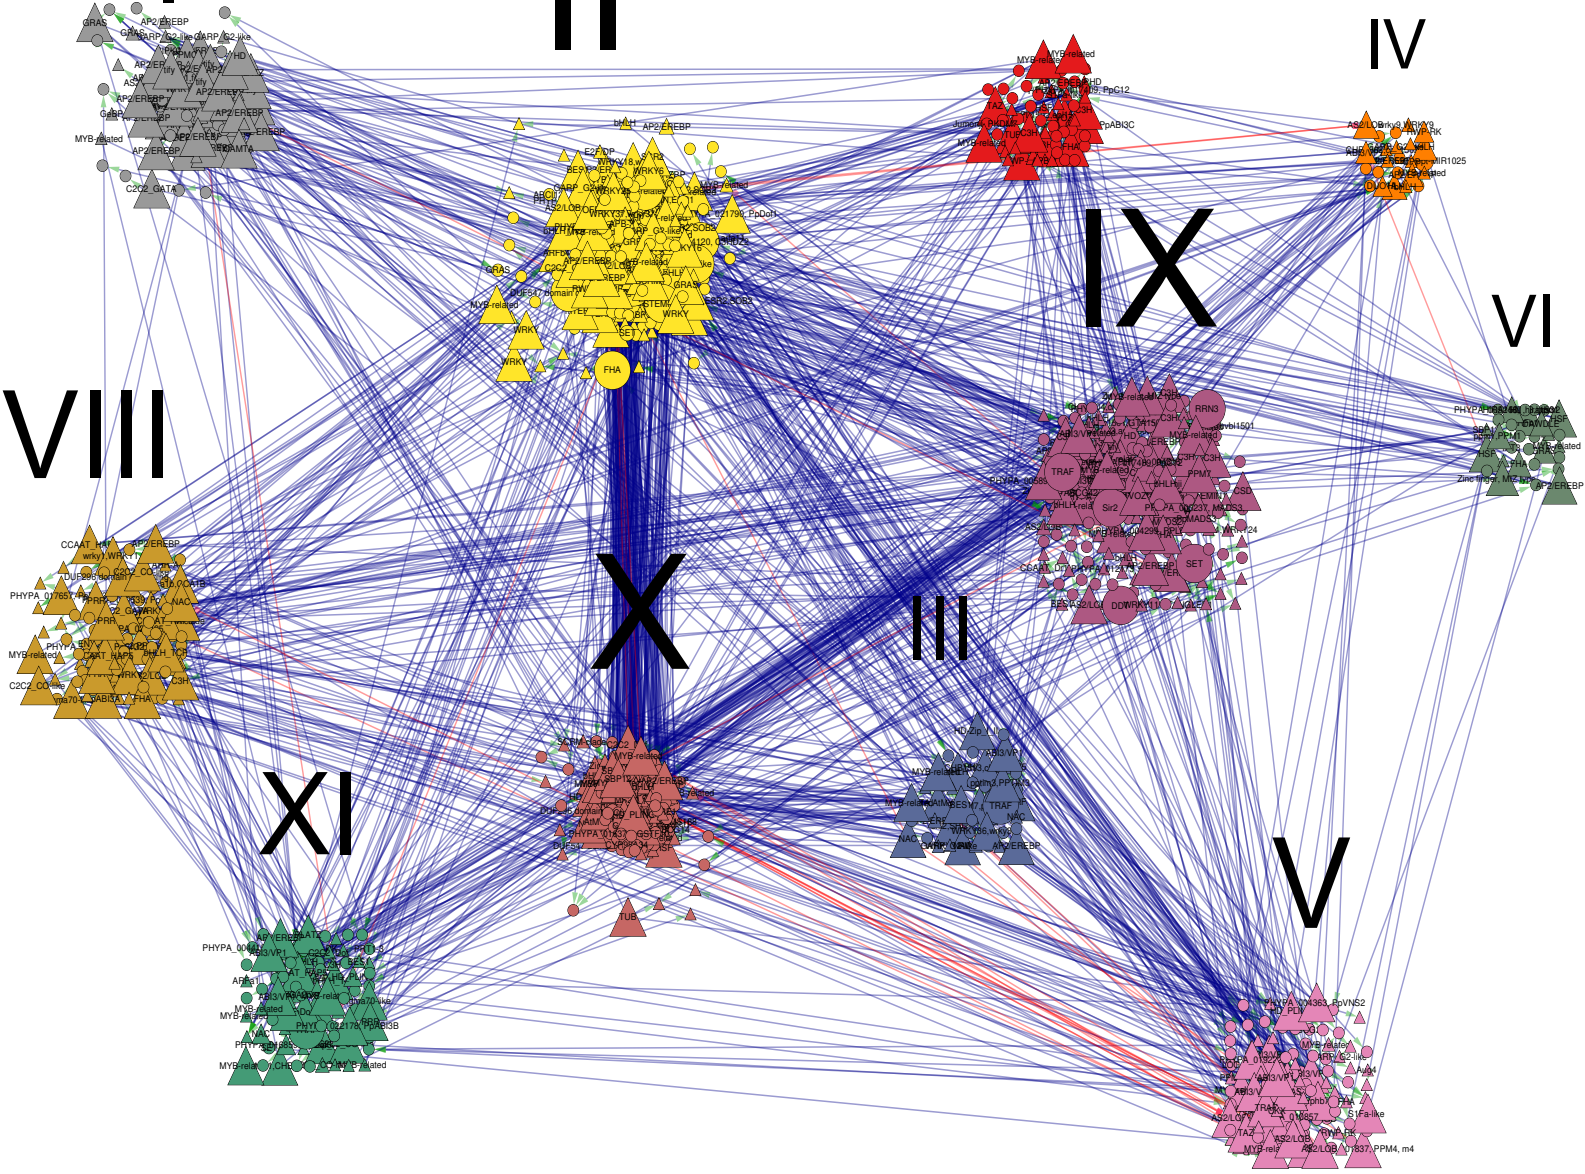

# S10k

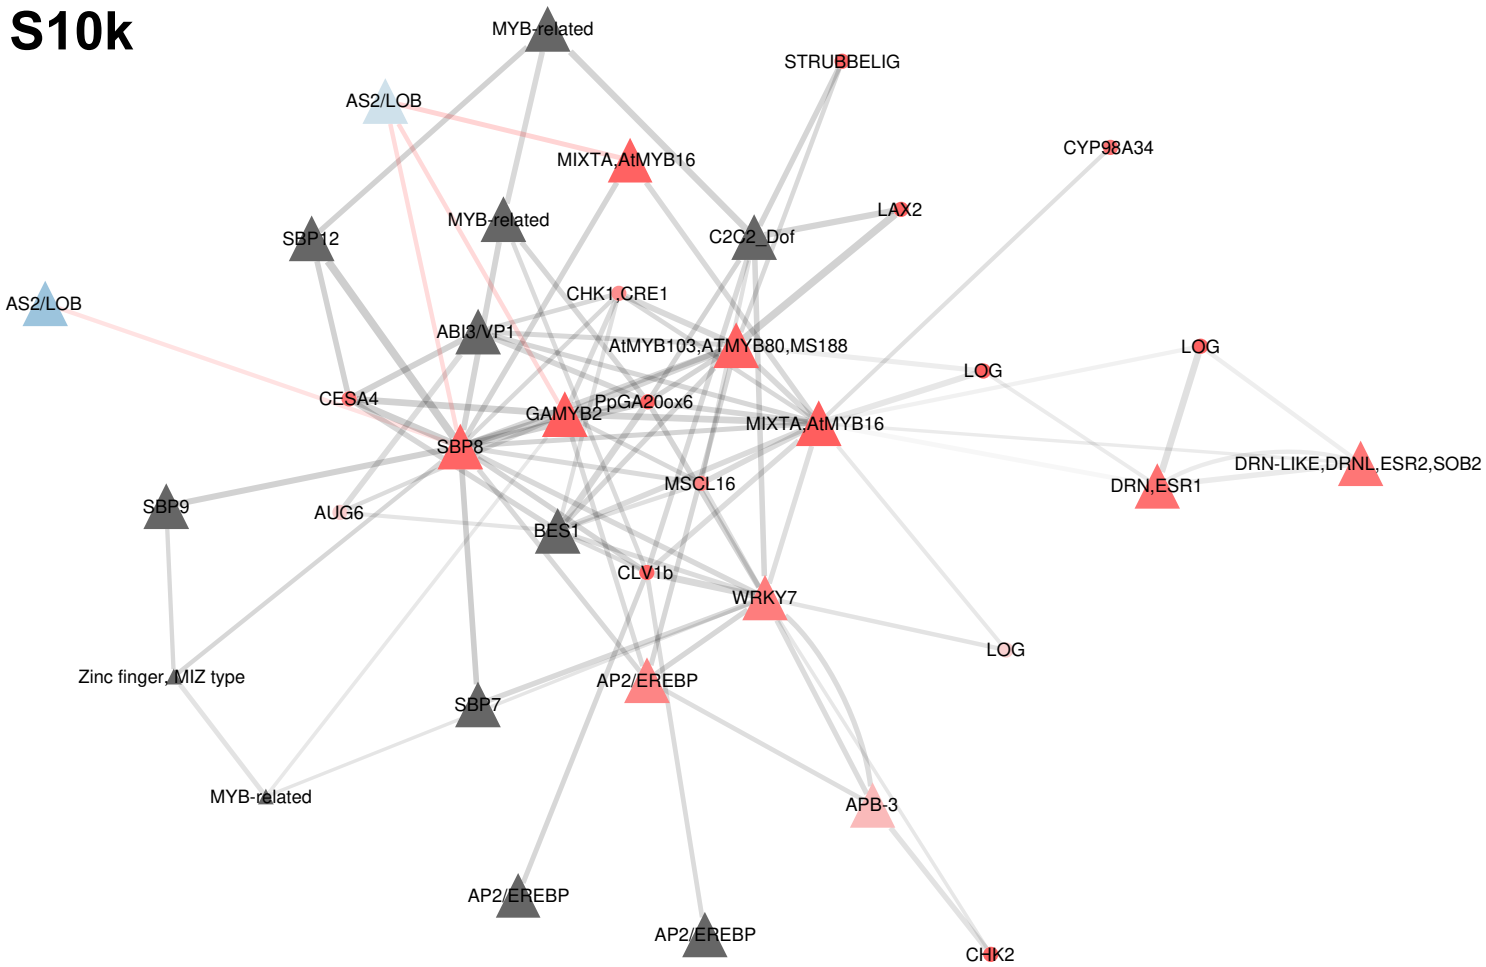

**S10****I**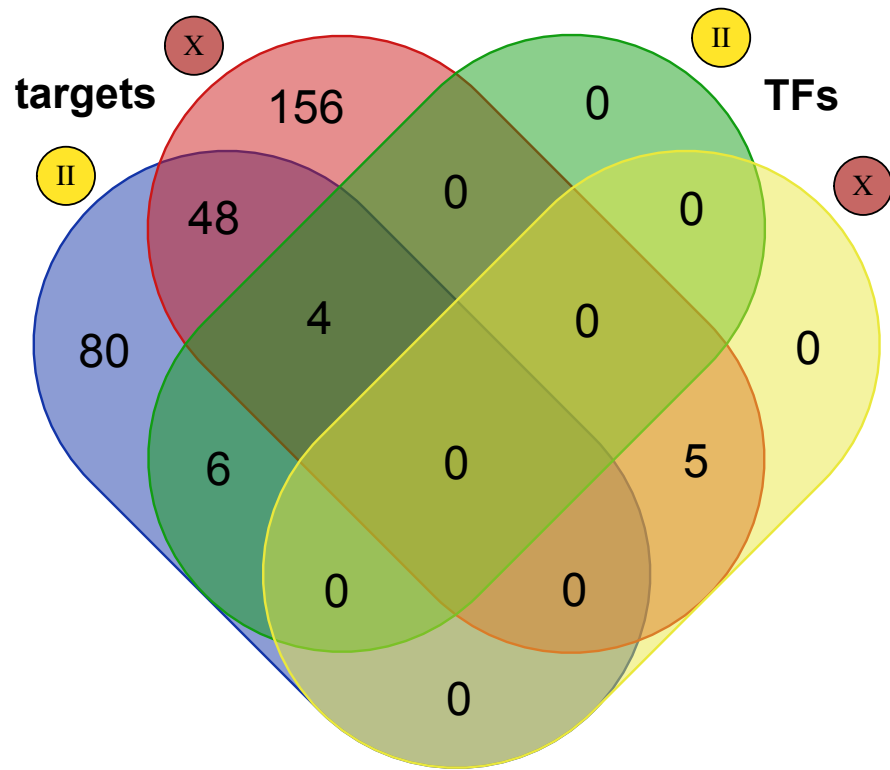**m**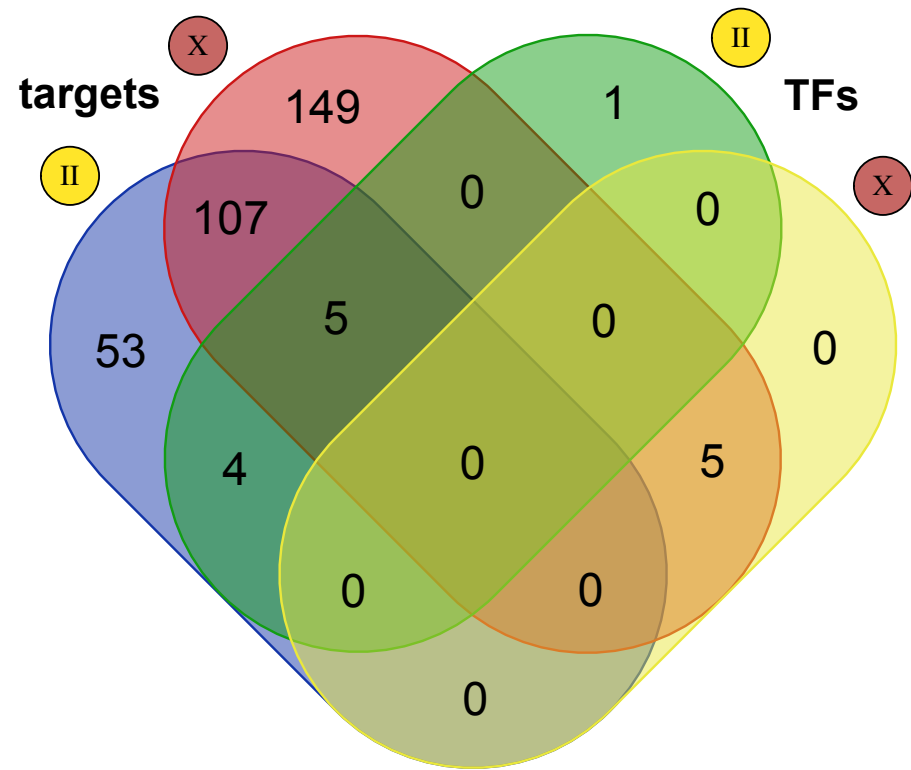

## Supplementary Fig. S10.

### Deciphering complex phenotypes by Factorial Differential Gene Expression Network Enrichment Analysis (FDGENEA).

**S10a. Translation of the complex DEK1 phenotype to phenotypic factors.** Graphical summary of the quantified *DEK1* mutant phenotypes and translation into binary phenotypic factors (first table column in Panel S10b. Cell numbers are used throughout the other panels to refer to a specific phenotypic trait.

**S10b. Contrasting phenotypic factors in Differential Gene Expression Network Enrichment Analysis.** Numbers refer to cell numbers containing drawings of the respective phenotype in Panel S10a. Symbols in the heat map cells represent directionality of differential gene expression for each component trait for each of the subnetworks: + depicts enrichment of up-regulated genes. - depicts enrichment of down-regulated genes. Heatmap fill-color of each cell represents the z-score-scaled, overall enrichment of DEGs (irrespective of their directionality) for each phenotypic factor. Subnetworks X, II and V are predominantly enriched for regulons affecting 2D-to-3D phenotypes.

**S10c. Enriched subnetworks and upstream regulators associated with high number of buds per filament – subnetwork colors.** Nodes are color-coded by subnetworks. Node sizes relative to the cumulative, absolute fold-change of deregulation of the respective gene and any possible target gene in the mutants. Node shapes: TFs depicted as triangles, TRs as diamonds, miRNAs as inverted triangles and targets as circles. Edge colors: positive correlation of connected nodes in DEK1 RNASeq data (black) and negative correlation coefficient (orange).

**S10d. Enriched subnetworks and upstream regulators associated with high number of buds per filament – log<sub>2</sub>foldchanges.** Same graph and attributes as Panel S10c, but color-coded by directionality of DGE analysis (intensity gradient relative to log-fold change). The three groups of nodes depicted in Panels S10c and S10d correspond to genes that are (R) positively associated with a high number of buds (i.e. are up-regulated in *Δdek1* and *Δloop*; right group), (L) display a negative association (i.e. up-regulated in WT, *oex1* and *Δlg3*<sup>18</sup>; left group and down-regulated in *Δdek1*<sup>8</sup> and *Δloop*<sup>19</sup>) or (T) upstream regulators without significant change in gene expression with respect to this phenotype (top group). This clustering is also evident in the type of connections between these groups – especially the two major assemblages harbor many negative regulatory interactions (orange color of links between them). Overall, while subnetwork V dominates the left group, the right group of nodes is more diverse and consists of subnetworks X, XI and IX. Subnetwork II is prominent in both groups. This pattern gives important insight into the implementation of this developmental phase transition – a predominantly negative interaction between the regulatory toolkit driving gametophore development (X) and the gene complement of the primary filament (V; chloronema). This transition between cell states is brokered by the subnetwork II, which is also implementing the other types of secondary filaments (caulonema and rhizoids). Subnetworks IX and XI seem to act in conjunction.

**S10e. FDGENEA gene sets.** These sets comprise genes that are significantly (LRT q-value < 0.1) associated with any of the phenotypic factors and fall within any of the enriched subnetworks (see Panels S10a and S10b).

**S10f. Top50 intersections between the FDGENEA gene sets.** UpSetR plot depicting the 50 largest non-overlapping FDGENEA gene sets (Panels S10b and S10e).

**S10g. The indirect DEK1 target types display specific enrichment patterns among the FDGENEA sets.** Subset of the FDGENEA gene sets that is predicted to be indirectly targeted by DEK1, i.e. controlled by either an activator or a repressor TF that is directly cleaved by the DEK1 calpain. Enrichment of the respective DEK1 target type in each of the FDGENEA gene sets was tested using the *enrichment\_test* method from the RVen package. P-values for both target types were used to cluster the sets by hierarchical clustering using the *ward.D2* method in R.

**S10h. All intersections of gene sets associated with traits involving the number of buds per filament i.e. bud initiation.** UpSetR plot depicting non-overlapping FDGENEA gene sets (Panels S10b and S10e).

**S10i. Network of DEK1-controlled, overbudding up-regulated genes.** Network plot depicting FDGENEA gene set with significant, positive association to the *number of buds per filament high* trait, predicted to be indirectly or directly controlled by DEK1. Total number of nodes: 901 genes. Node colors based on subnetwork affiliations. Nodes were labeled based on available manual annotations, which are usually indicative of experimental evidence or curation efforts for this study. Edge colors based on mutant expression pattern and directionality of the predicted, DEK1-controlled, regulatory interaction (i.e. blue: *activator targets* and red: *repressor targets*; see Fig 1 and main text for details). Triangular node shape indicates predicted, DEK1-controlled TFs (cleavage targets) and circles their targets. Node sizes relative to overall local reaching network centrality.

**S10j. Network of DEK1-controlled, overbudding up-regulated genes and their top5 DEK1-controlled regulators.** Network plot depicting FDGENEA gene set with significant, positive association to the *number of buds per filament high* trait, predicted to be indirectly controlled by DEK1 and their top5, direct, DEK1-controlled regulators. Total number of nodes: 1,222 genes. The latter were ranked by their overall GENIE3 weight for each target and did not need to be significantly associated with the trait themselves. Node colors based on subnetwork affiliations. Nodes were labeled based on available manual annotations, which are usually indicative of experimental evidence or curation efforts for this study. Edge colors based on mutant expression pattern and directionality of the predicted, DEK1-controlled, regulatory interaction (i.e. blue: *activator targets* and red: *repressor targets*; see Fig 1 and main text for details). Triangular node shape indicates predicted, DEK1-controlled TFs (cleavage targets) and circles their targets. Node sizes relative to overall local reaching network centrality.

**S10k. Full regulatory context of CLV1b is enriched for genes involved in flowering plant meristem initiation and maintenance that are positively associated with bud initiation.** Network plot depicting the regulatory context of CLV1b, i.e. genes that are predicted to be controlled by the same regulators as CLV1b and TFs. Selected were only genes that are not more than two orders away, i.e. maximally direct targets of regulators of regulators of

CLV1b. Triangular node shapes indicate predicted direct NERD-like calpain cleavage. Node colour scaled according to log2foldchange from the FDGENEA analysis of the overbudding trait (up = positive association = red; down = negative association = blue; grey = LRT q-value  $\geq 0.1$ ).

**S10l. Partial overlap between DEK1-controlled AP2 and MYB TFs in subnetworks II.**

Venn diagram depicting intersections between the target lists of the ten subnetwork II AP2 (APB-3, SEMIN3 as well as orthologs of PUCHI, DRN, DRNL, SEMIN3) and five subnetwork X MYB (GAMYB and orthologs of MYB80 and MIXTA) TFs. Targets were selected from *overbudding* up-regulated, predicted DEK1-controlled regulatory interactions (Fig. S10j) choosing first and second degree outgoing connections of said TFs (Supplementary Data sheet S11; columns B & E).

**S10m. Partial overlap between DEK1-controlled AP2 and MYB TFs in subnetworks II and X.**

Venn diagram depicting intersections between the target lists of the ten subnetwork II AP2 (APB-3, SEMIN3 as well as orthologs of PUCHI, DRN, DRNL, SEMIN3) and five subnetwork X MYB (GAMYB and orthologs of MYB80 and MIXTA) TFs. Targets were selected from the extended *overbudding* up-regulated, predicted DEK1-controlled regulatory interactions that included also the up to top5 DEK-controlled regulators independent of their deregulation pattern with respect to *overbudding* (Fig. S10j) choosing first and second degree outgoing connections of said TFs (Supplementary Data sheet S11; columns C&F).

# S11

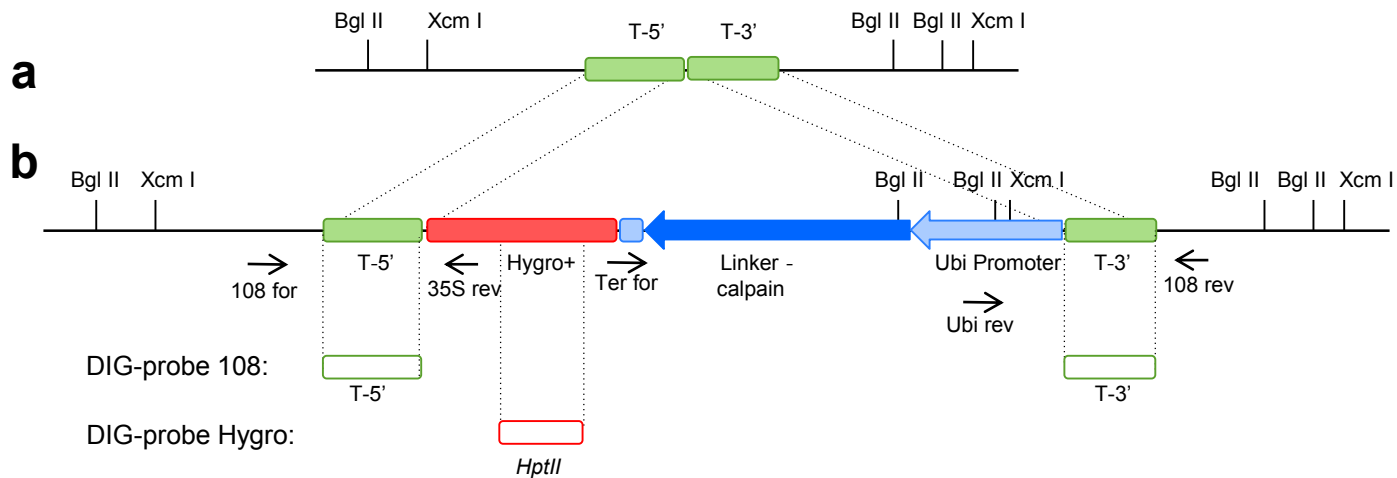

**c**

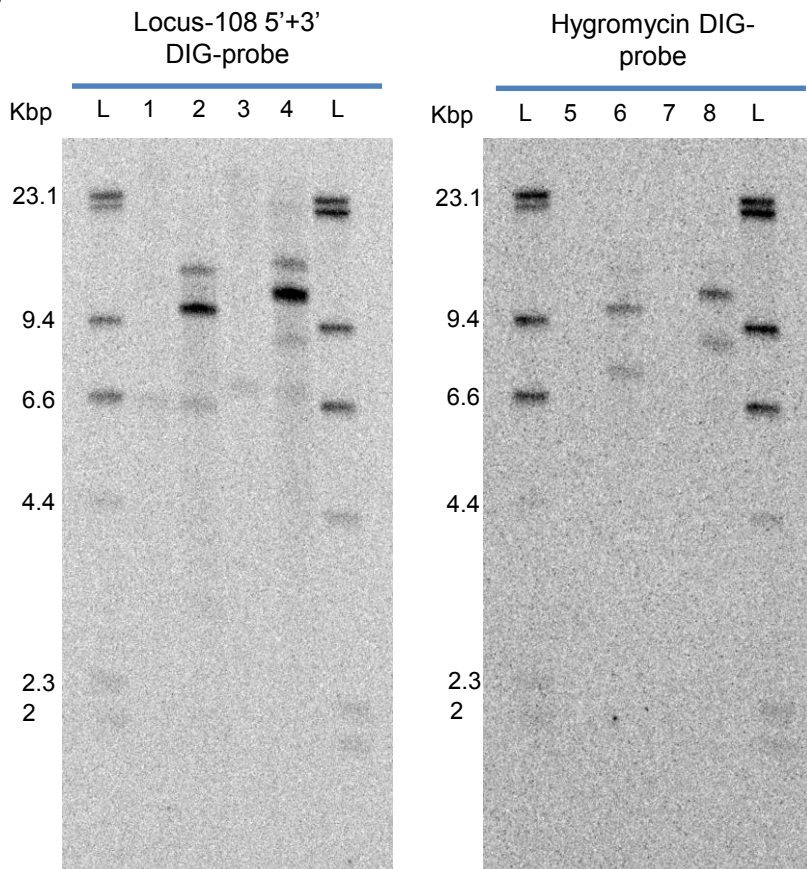

**d**

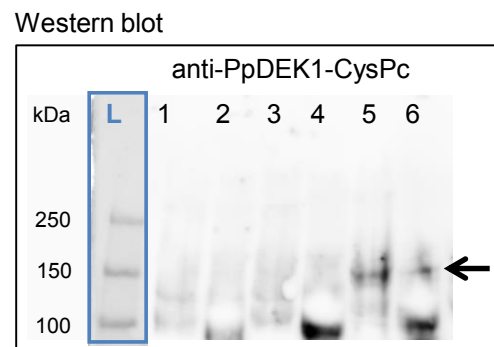

**e** PCR

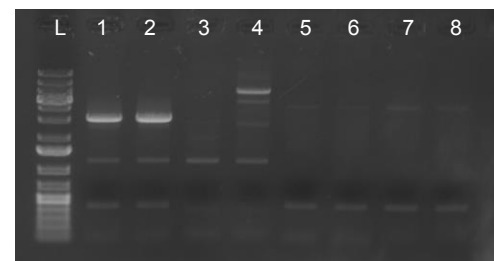

1, 2: 108\_for – 108\_rev  
 3, 4: 108\_for – 35S\_rev  
 5, 6: Term\_for – 108\_rev  
 7, 8: Ubi\_rev – 108\_rev



S11

f

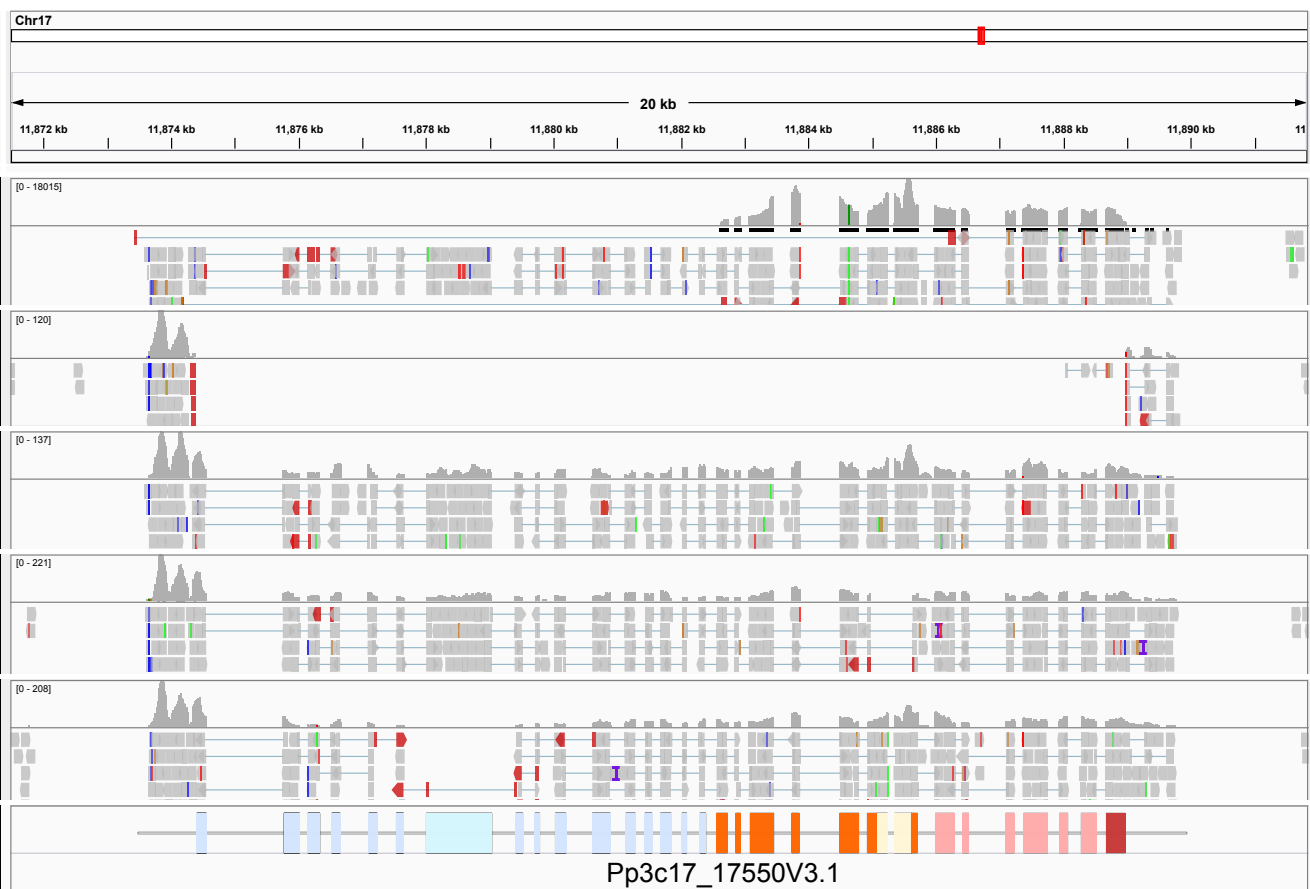

g

DEK1 protein domain structure

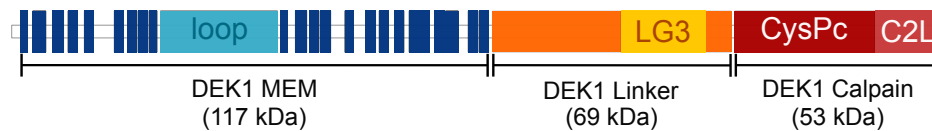

## Supplementary Fig. S11.

### Molecular analysis of the linker-calpain overexpressing (*oex1*) strain.

**S11a. The *108* locus (T-5', T-3') in the wild type (WT).** Schematic representation of 5' and 3' targeting sites (green filled boxes) for the insertion of the PpDEK1 Linker-Calpain overexpression construct at the neutral *108* locus<sup>15</sup> in the *P. patens* WT genotype. Used restriction sites are marked and annotated as ticks.

**S11b. Schematic representation of the *108* locus in the *oex1* genotype.** Designed targeting of the PpDEK1 Linker-Calpain construct (blue, thick arrows) under a maize ubiquitin promoter (light blue thick arrow) and Terminator (light blue thick box) coupled with a hygromycin-resistance cassette (35S promoter - HptII hygromycin resistance gene; red box). Positions of the restriction sites (black ticks), DIG-probes (green and red framed boxes) and primers (black arrows) used in downstream analyses (Figs. S11c, d, e) are marked and annotated accordingly.

**S11c. Southern blot analysis of *oex1* transformant.** The Southern blot analysis performed with two different restriction enzymes, Bgl II and Xcm I, indicates that *oex1* is a stable transformant. The line *oex1* contains multiple concatenated copies of the PpDEK1 Linker-Calpain construct inserted at a single genomic position, the locus *108*. This insertion pattern represents the majority of the mutants obtained with this transformation procedure in *P. patens*<sup>16</sup> and is not known to induce any phenotype per se. Lanes 1, 3, 5 and 7 contain wild type genomic DNA. Lanes 2, 4, 6 and 8 contain *oex1* genomic DNA. Lanes 1, 2, 5 and 6: Bgl II restriction digestions; lanes 3, 4, 7, 8, 10: Xcm I restriction digestion. Lane L: Lambda phage-HindIII DIG labeled marker.

**S11d. Detection of the PpDEK1 Linker-Calpain protein in *oex1*.** Western blot detecting PpDEK1 CysPc epitope with polyclonal anti-PpDEK1 CysPc-C2L antibody. L: protein ladder, 1, 2: WT, 3, 4: *Δdek1*, 5, 6: *oex1*. Protein samples in lanes 1, 3, 5 were heated before PAGE, samples 2, 4, 6 were not heated before PAGE. Chemiluminescence was detected followed by imaging of the prestained dual color protein marker (Bio-Rad) on the same membrane. The marker image (lane L; blue frame) was merged with the chemiluminescence scan. The *oex1* line displays a clear signal between the 90 and 150kDa marker size (lanes 5, 6), that is absent in WT (lanes 1, 2) or *Δdek1* (lane 3, 4) and corresponds to the predicted 120kDa Linker-Calpain protein. The bottom part of the membrane scan contains a uniform identical background banding signal present in all tested genotypes generated by the polyclonal anti-PpDEK1 CysPc-C2L antibody. Original TIFF whole versions of the blot and the gel are provided in the External Files part of the data archive deposited on Zenodo (wetlab/gels\_and\_blot/Western/C2\*.tif).

**S11e. PCR genotyping confirms genomic insertion in the *108* locus' 5' region.** Primer pairs are indicated below the gel image. L: GeneRuler 1 kb DNA ladder, lanes 1, 3, 5, 7 WT DNA template, 2, 4, 6, 8 *oex1* DNA template. The specific amplification signal from the 5' flank of the construct in *oex1* (lane 4) but not in the WT (lane 3) and not from the 3' flank (lanes 6 and 8) points to the insertion of the PpDEK1 Linker-Calpain construct at the 5' site of the *108* locus. The presence of a full *108* signal in *oex1* (lane 2) indicates the presence of an intact *108* fragment probably associated with the aforementioned complex concatenated insertion.

**S11f. Genomic mapping of RNASeq data confirms *DEK1* mutant genotypes and expected transcriptional outcomes.** Integrative Genome Viewer<sup>17</sup> tracks displaying the coverage and alignments from a mapping of RNASeq data of the four *DEK1* mutants and the wild type (WT) at day 14 of gametophytic development with respect to the V3.3<sup>21</sup> gene

structure of *DEK1* (last track). Each of the RNASeq tracks is composed of two subtracks: 1) an upper subtrack displaying the coverage as a density plot. Peak minimum and maximum number of reads depicted in the upper left corner of the subtrack (e.g. *oex1* [0-18015]). 2) lower subtrack displays exemplary individual read alignments (color-coded by SAM alignment flags, non-gray colors usually indicating aberrant/low quality alignments). The last track shows the predicted gene structure of *DEK1* in genome annotation V3.3<sup>21</sup> color-coded by the domain architecture of the DEK1 protein depicted in S11g. Boxes depict exonic and connecting thin lines the intronic regions of the gene. Coverage histograms and read alignments are consistent with the expected genotype of the respective *DEK1* mutant, with reads lacking entirely or partially in the full ( $\Delta dek1^8$ ) or partial ( $\Delta lg3^{18}$  and  $\Delta loop^{19}$ ) deletion lines as well as an over-accumulation of reads only in the regions encoding the Linker-Calpain domains in the *oex1* strain.

**S11g. DEK1 protein domain structure.** Overview of the DEK1 protein domain architecture. Individual domains and transmembrane regions are color-coded and annotated. Colored boxes represent conserved and/or functional domains and transmembrane regions, while the gray backbone depicts less conserved (spacer) regions.

# S12a

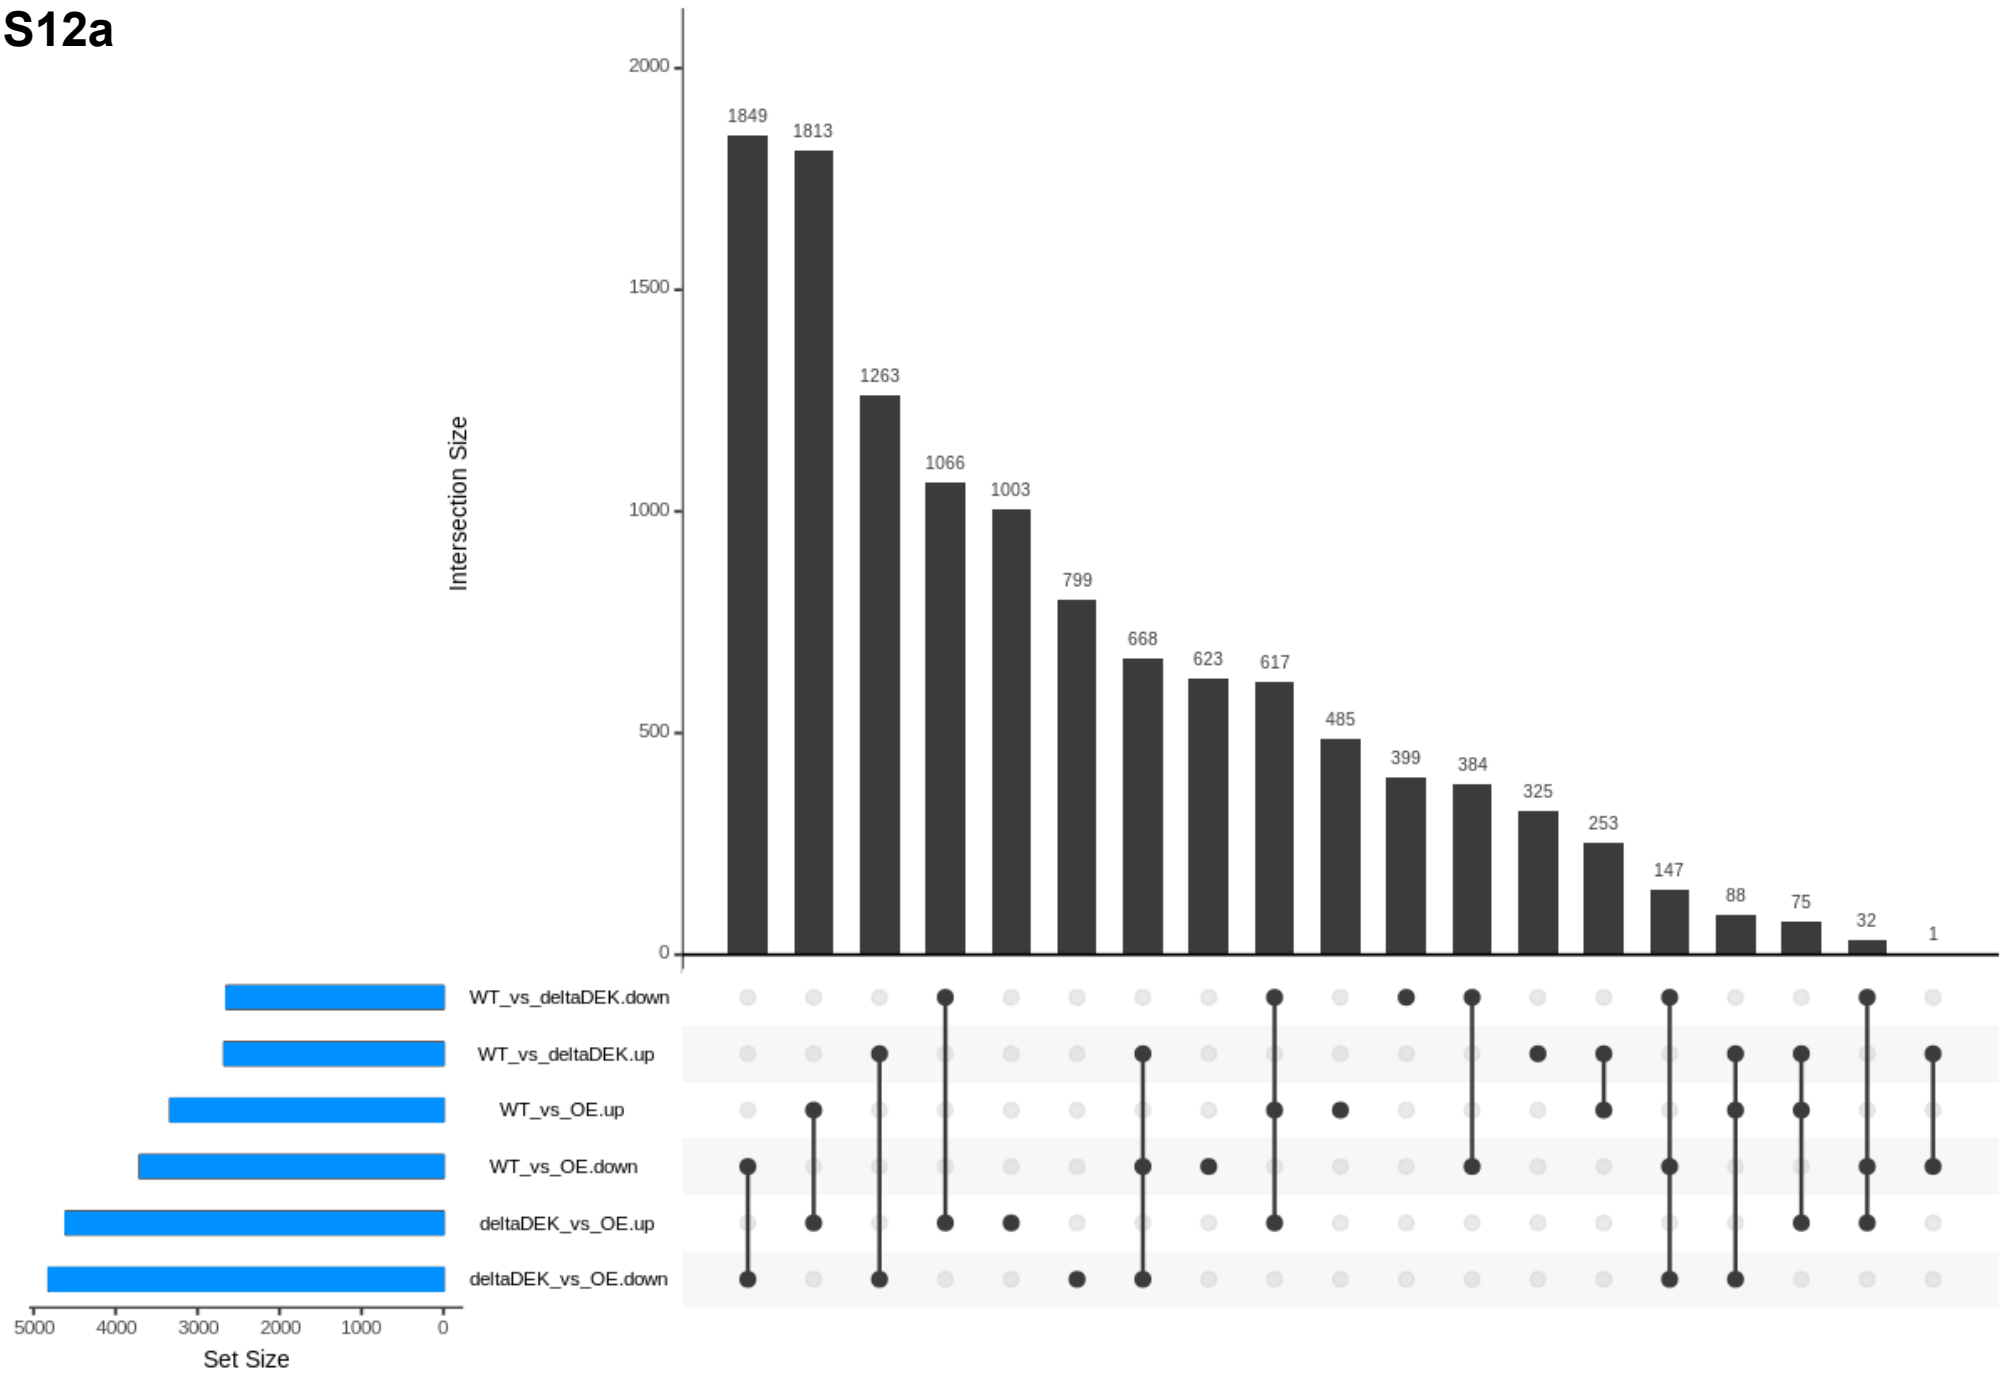



# S12c

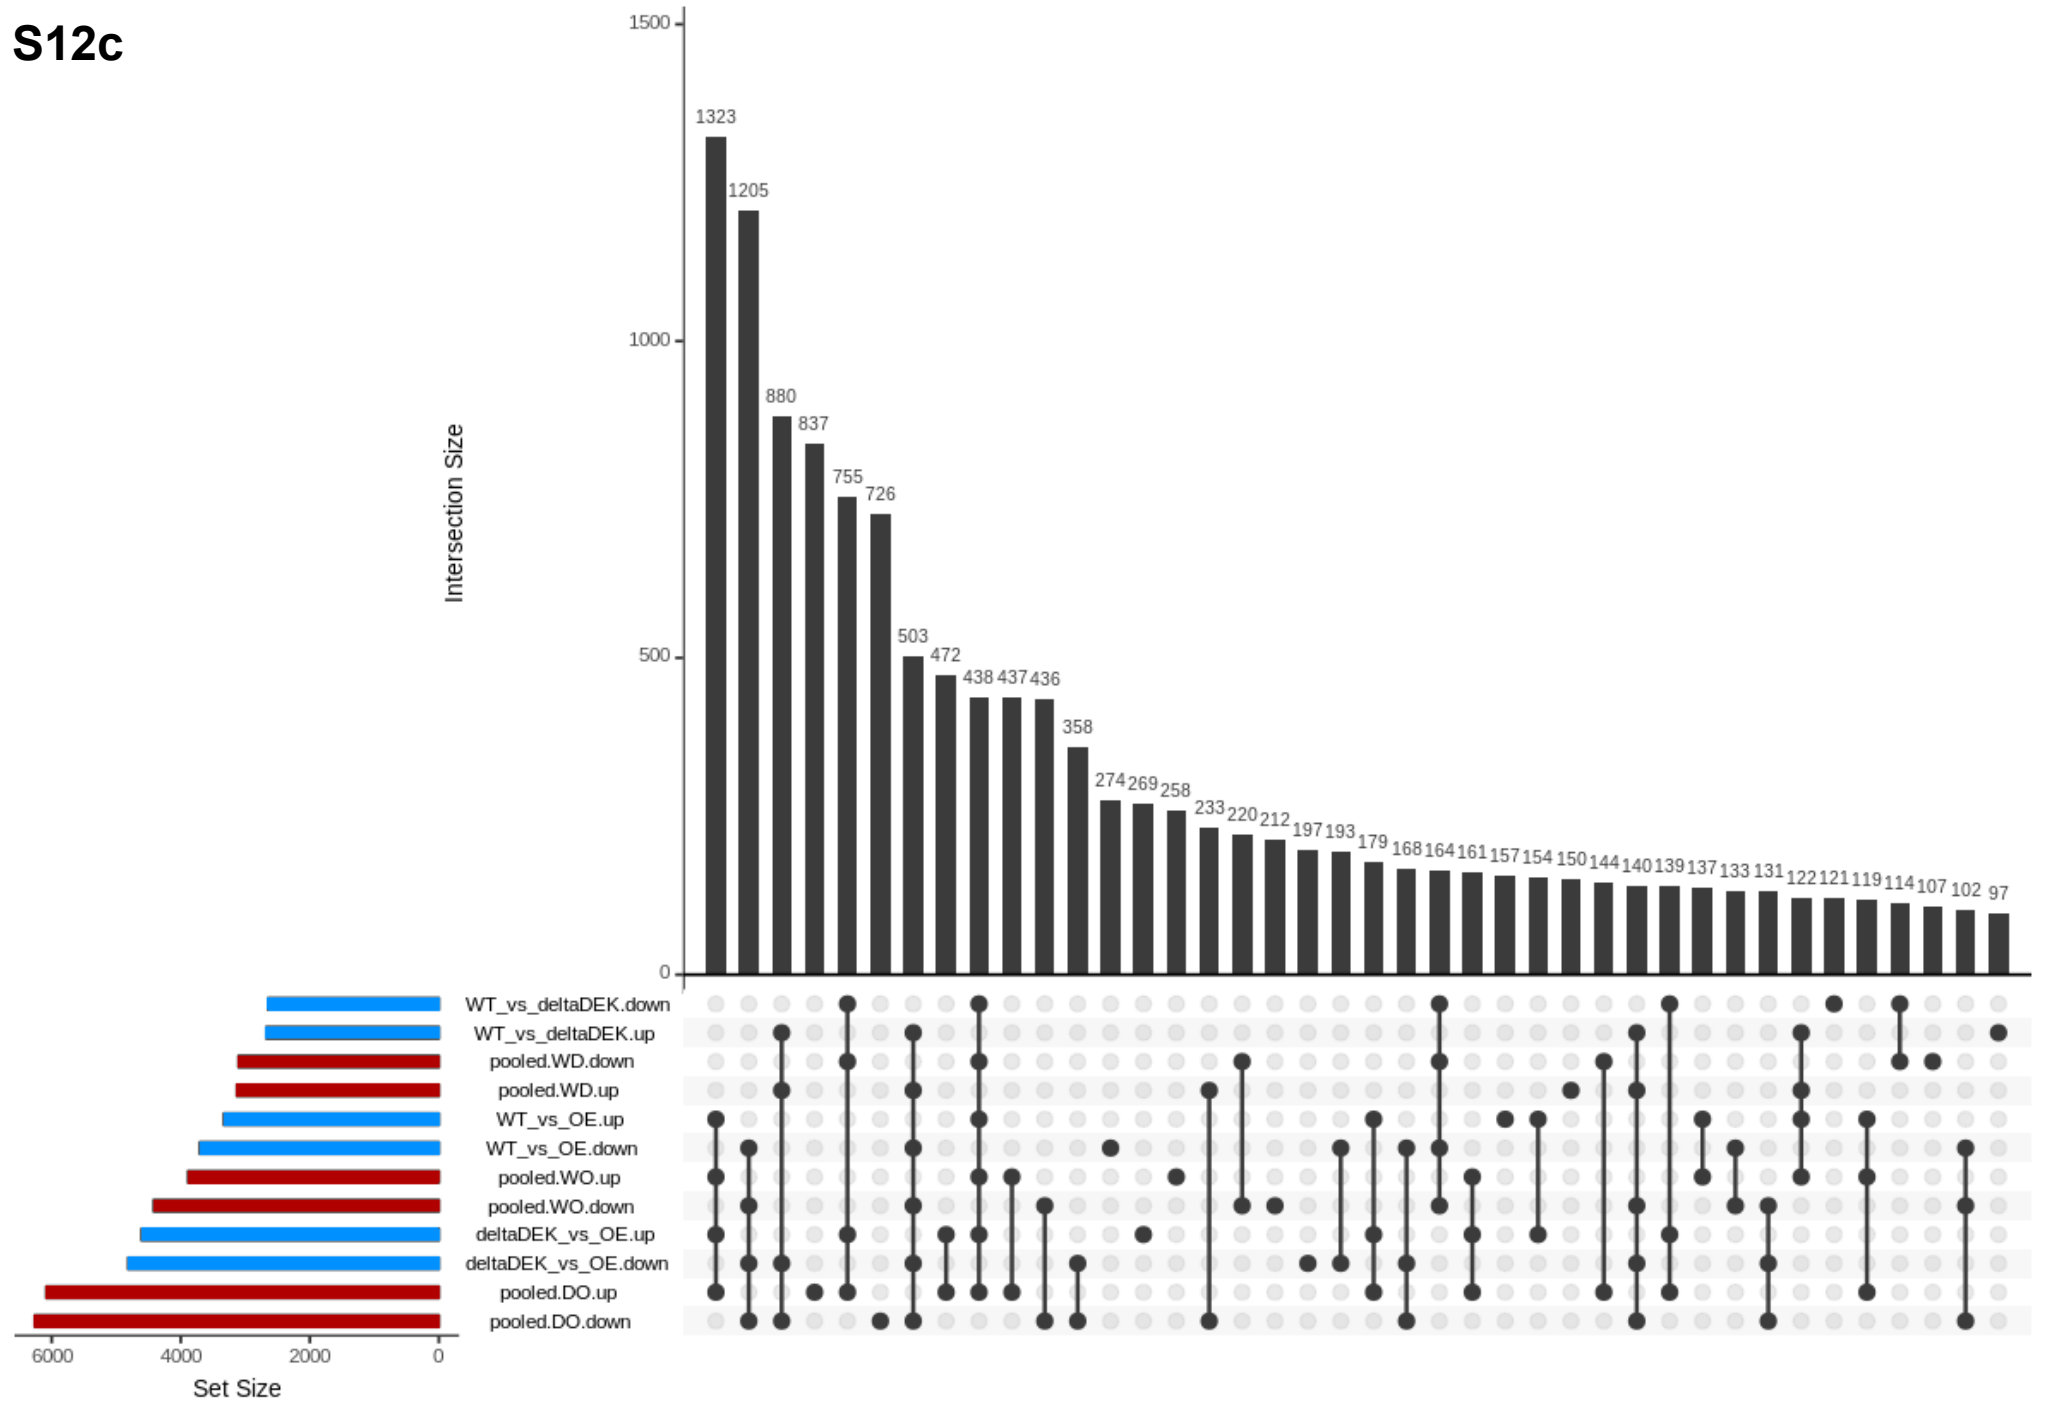

# S12d

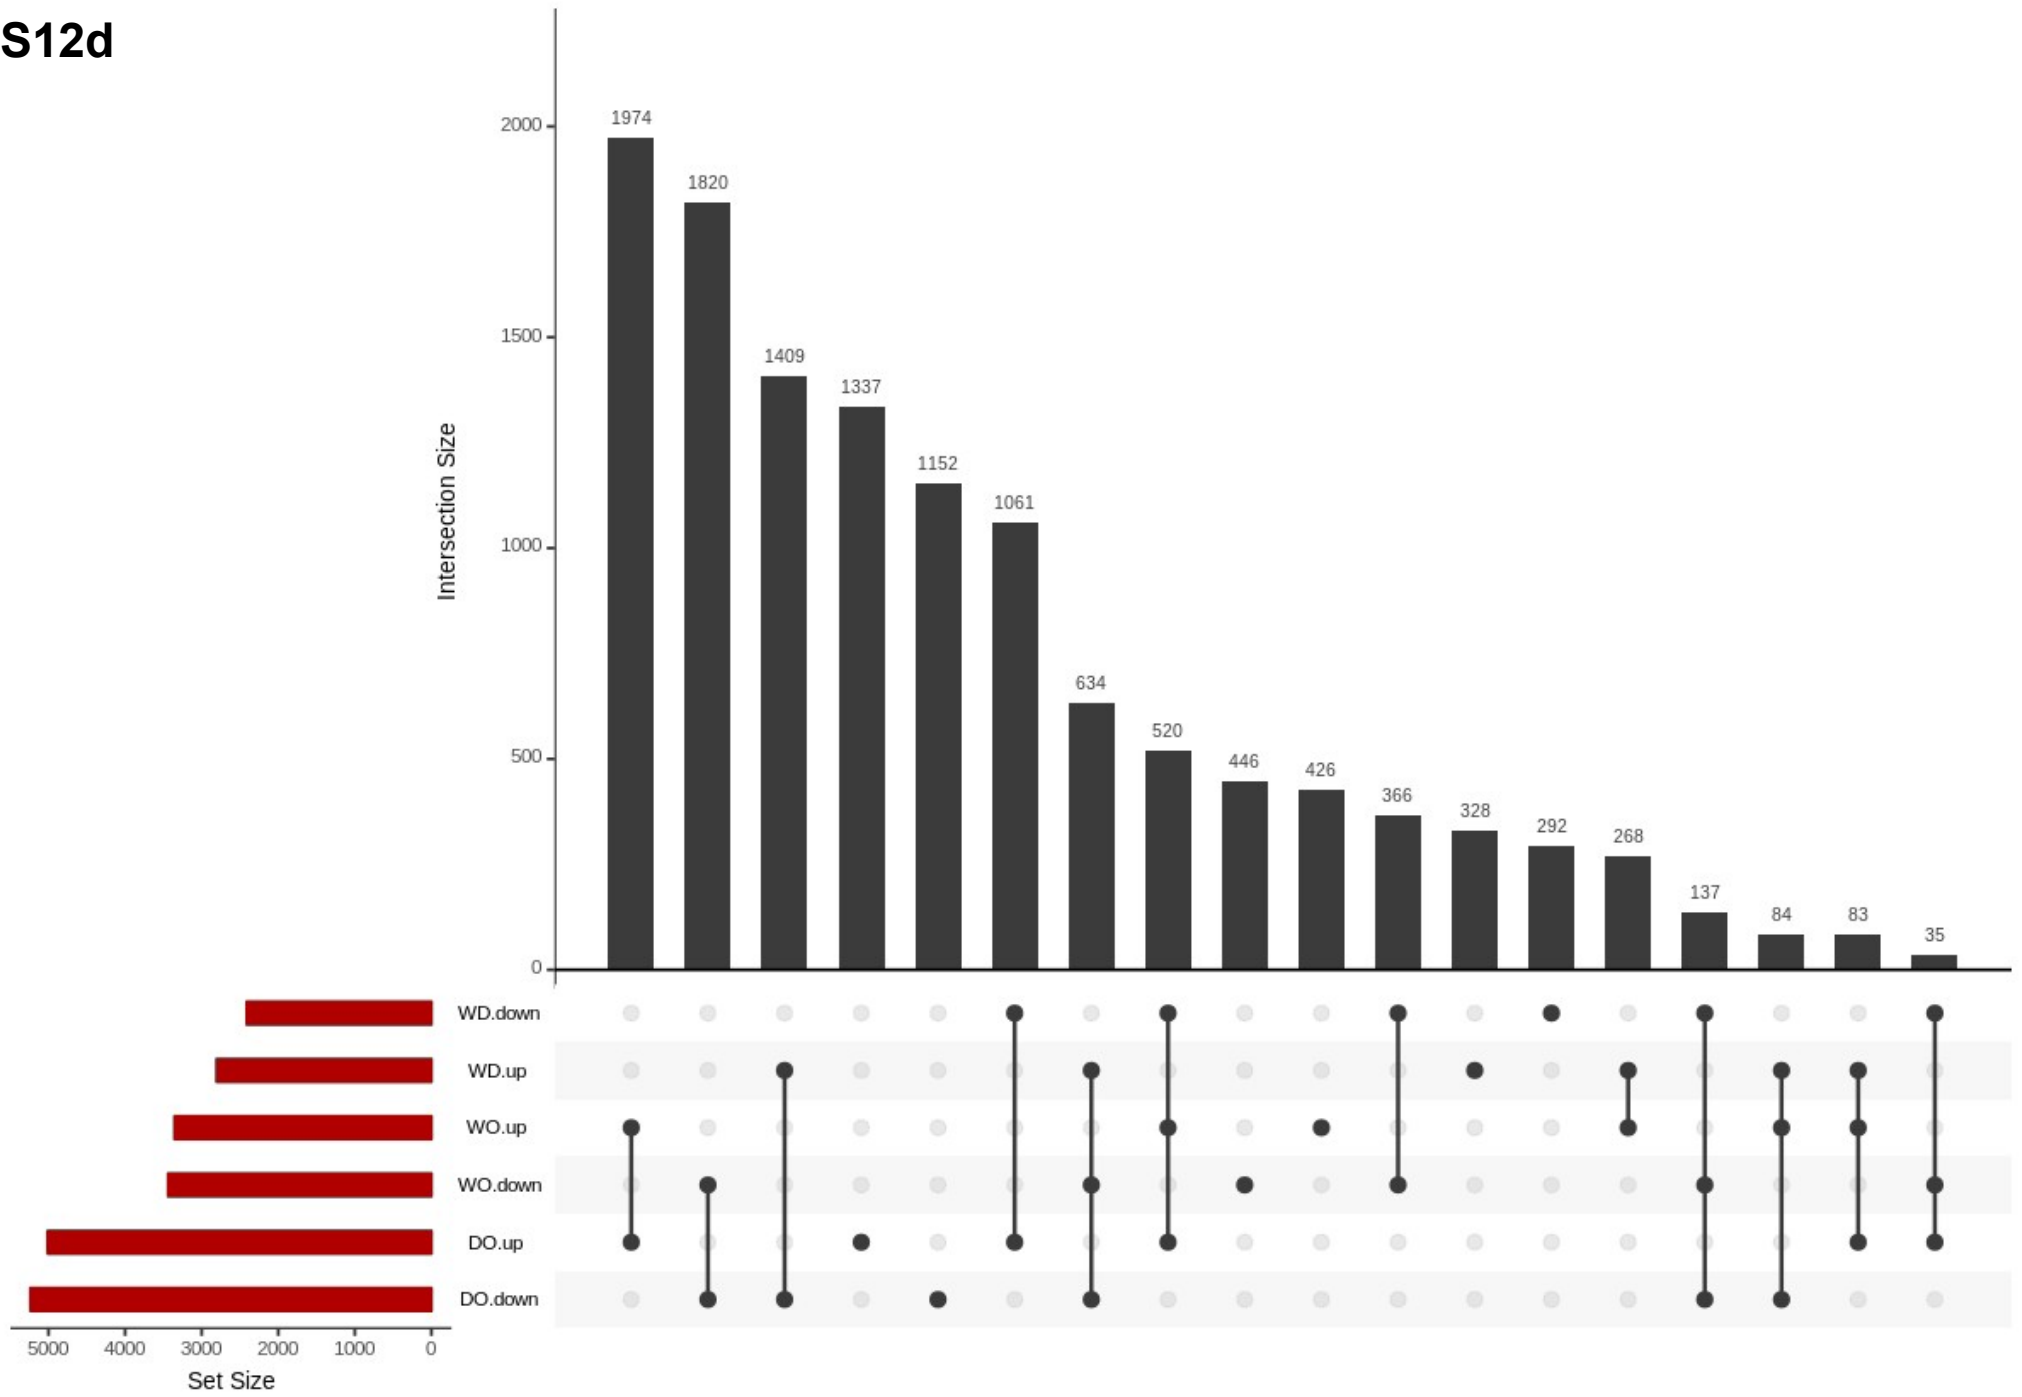

# S12e

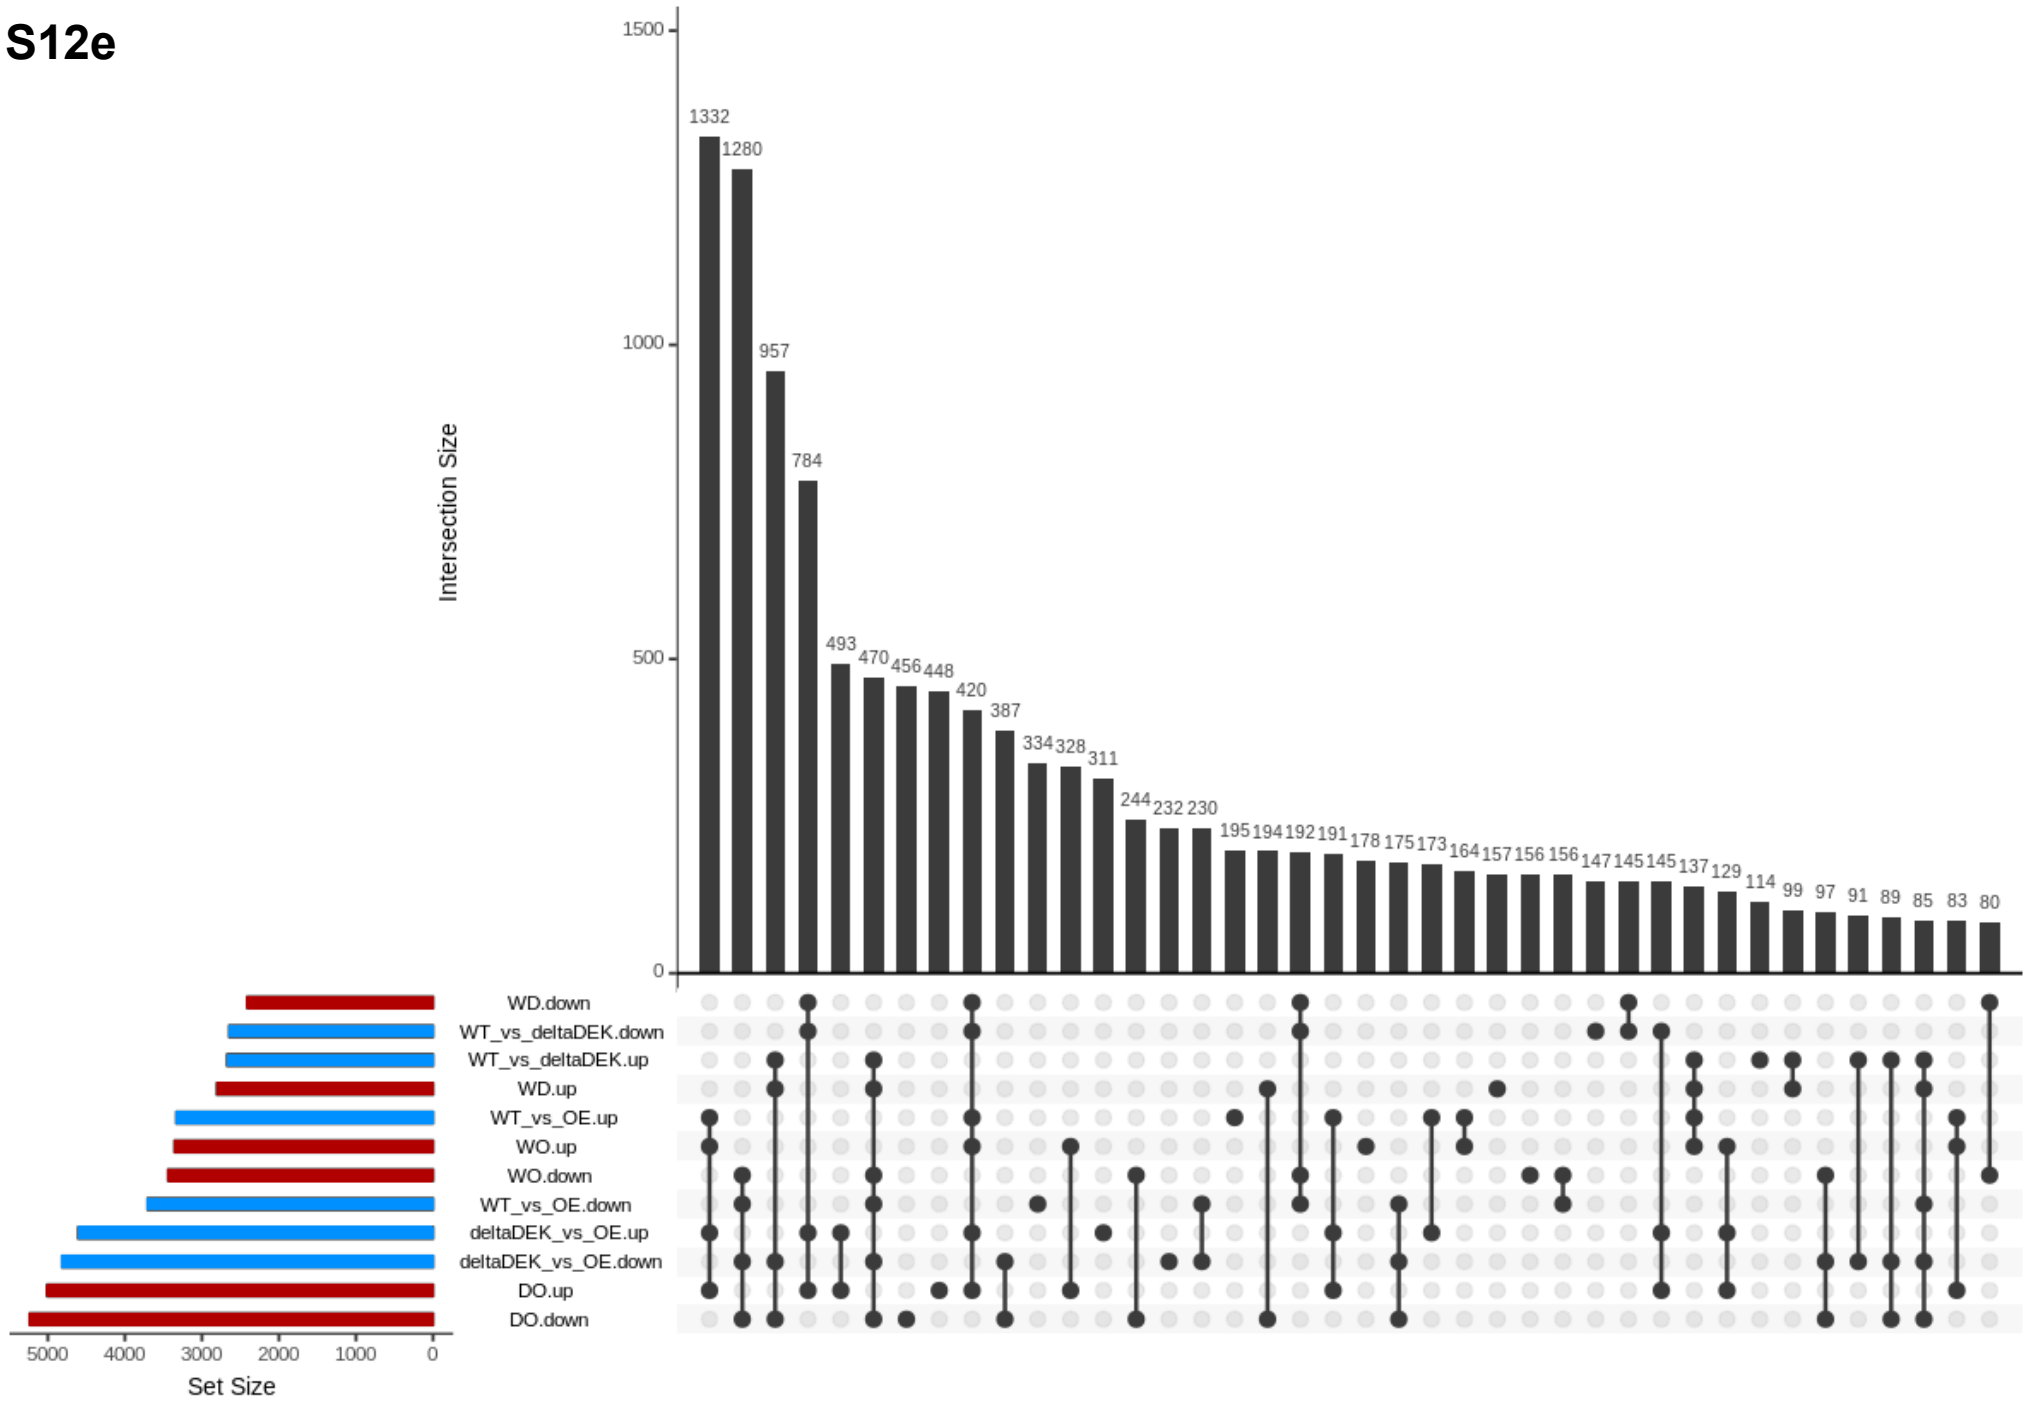



## Supplementary Fig. S12.

**Comparison of differential gene expression (DGE) analysis results of *dek1* mutant lines using sleuth<sup>2</sup> vs. edgeR<sup>20</sup>.** Global analysis of consistency between differentially expressed gene (DEG) sets. We compared the wild type (abbreviated in the subfigures as WT or W),  $\Delta dek1^8$  (deltaDEK or D), *oex1* (OE or O).

Several DGE approaches were assessed for their utility to analyze *dek1* mutant line time series comparisons. To illustrate the consistency among different approaches we include a comparison of sleuth and edgeR DGE analysis packages. As only sleuth supported time series modeling, we compared two strategies for edgeR: 1) pooling all time points per genotype and 2) testing time points individually and merging them prior to set analyses.

**S12a. Overlap of DEG sets inferred using the sleuth DGE analysis package modeling genotype + timeseries + batch.** UpSetR<sup>35</sup> plot depicting intersections and unique genes between up/down-regulated DEG sets comparing mutant lines and the wild type (WT) over time incorporating the error attributed due to RNA batch. Blue bars indicate the total DEG set size from DGE analysis using sleuth. Black bars indicate the size of the intersections/unique sets. Intersections are indicated by multiple, connected dots in the set matrix. Unique sets by only one dot.

**S12b. Overlap of DEG sets inferred using the edgeR DGE analysis package - Strategy 1 modeling genotypes with pooled time points.** Time point samples were analyzed as one pool per genotype as edgeR did not support time series modeling. UpSetR<sup>35</sup> plot depicting intersections and unique genes between up/down-regulated DEG sets. Red bars indicate total DEG set size from DGE analysis using sleuth. Black bars indicate the size of the intersections/unique sets. Intersections are indicated by multiple, connected dots in the set matrix. Unique sets by only one dot.

**S12c. Comparison of sleuth vs. edgeR Strategy 1 DEG sets.** UpSetR plot depicting intersections and unique genes between up/down-regulated DEG sets depicted in subfigure S12a (sleuth/blue color) vs. S12b (pooled edgeR/red color).

**S11d. Overlap of DEG sets inferred using the edgeR DGE analysis package - Strategy 2 modeling genotypes with individual time points and subsequent merging of sets.** Individual time point comparisons were carried out separately and subsequently merged for this intersection.

**S12e. Comparison of sleuth vs. edgeR Strategy 2 DEG sets.** UpSetR plot depicting intersections and unique genes between up/down-regulated DEG sets depicted in subfigure S12a (sleuth/blue color) vs. S12d (pooled edgeR/red color).

S13a

1 2 3 4 5 6 7 8  
L WT *oex1* WT *oex1* WT *oex1* WT *oex1*

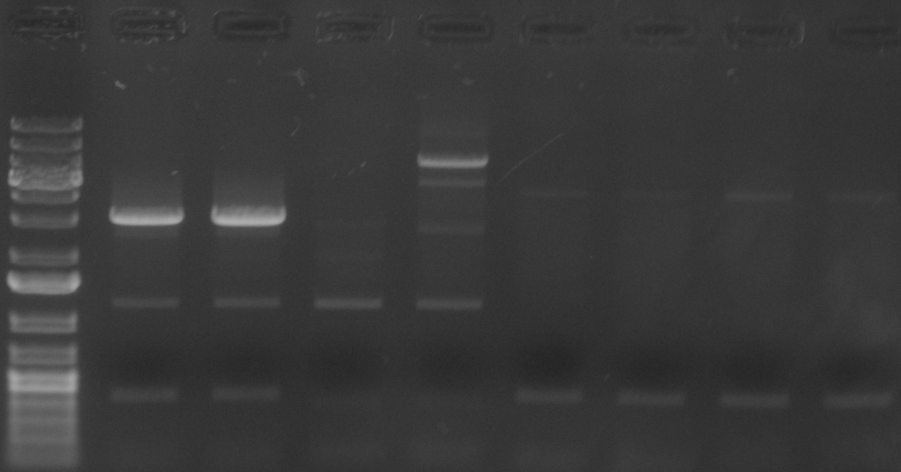

1, 2: 108\_For – 108\_Rev  
3, 4: 108\_For – 35S\_Rev  
5, 6: Term\_For – 108\_Rev  
7, 8: Ubi\_Rev – 108\_Rev

**S13b**

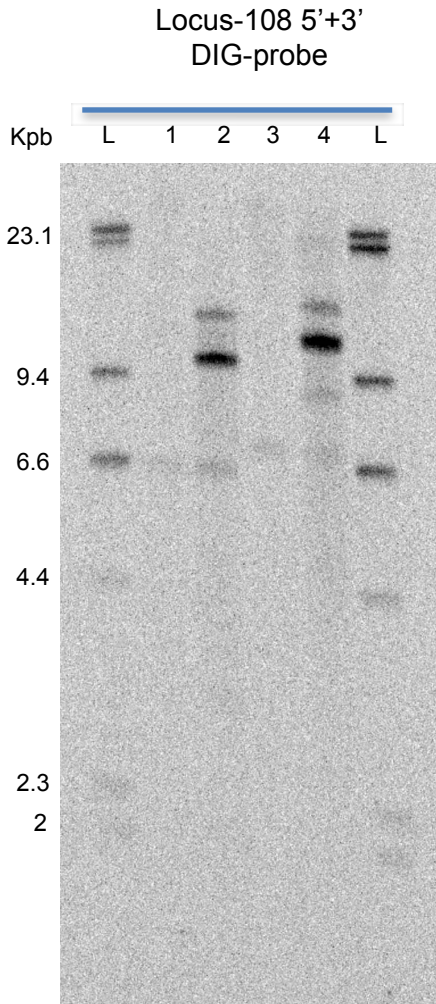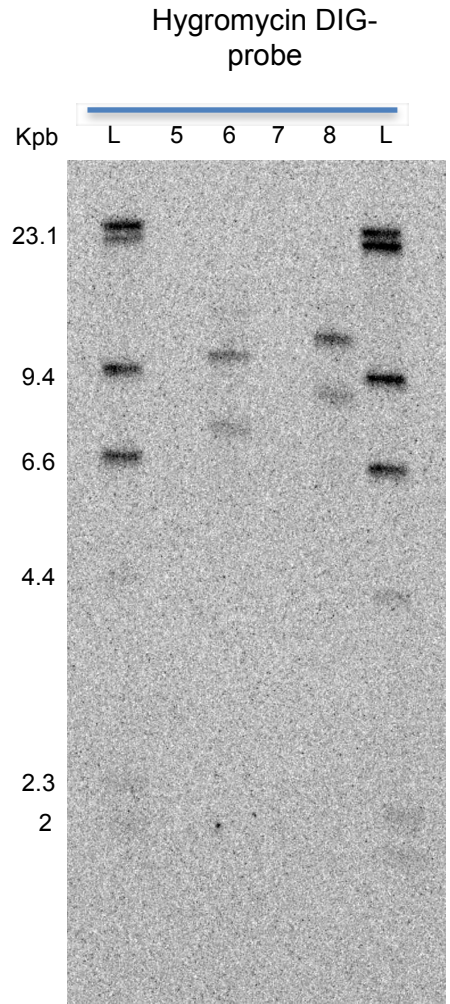

S13c

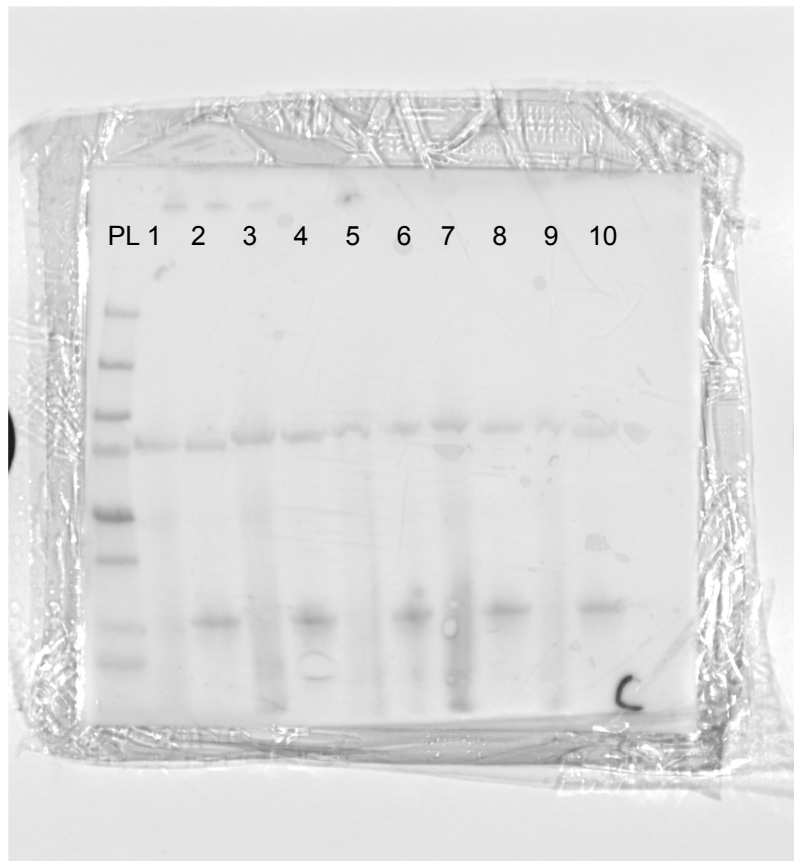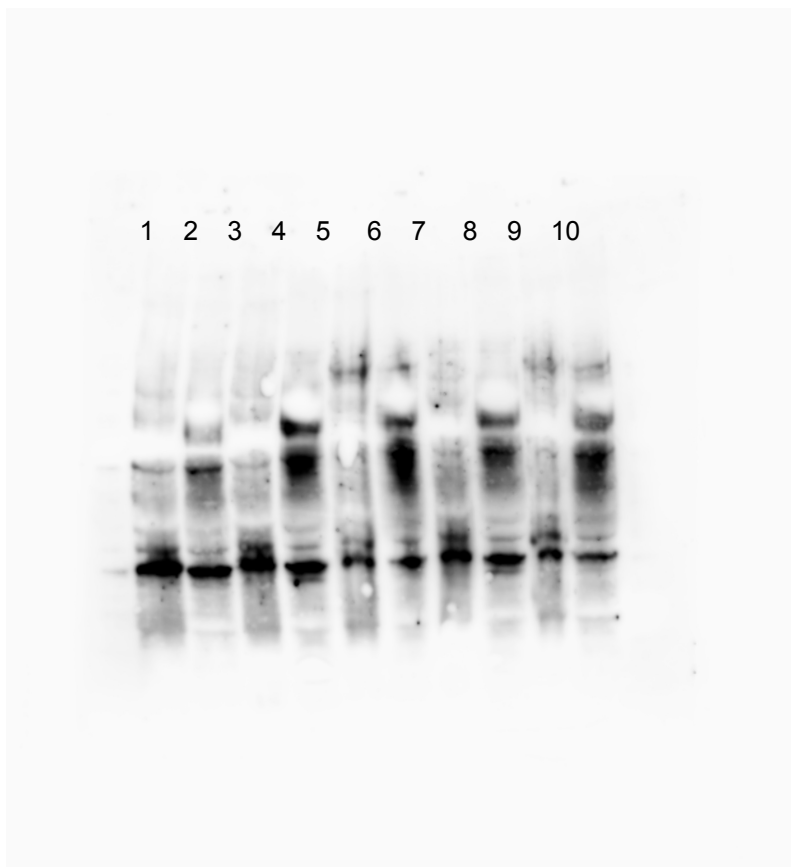

**Supplementary Fig. S13.**

**Unedited gel and blot images.**

**S13a.** PCR genotyping of the WT and *oex1* strain. Primer pairs used with DNA samples from individual strains are indicated below.

**S13b.** Southern blot analysis. Lanes 1,3,5, 7 wild type genomic DNA. Lane 2, 4, 6, 8 *oex1* genomic DNA. Restriction enzyme digests: lanes 1, 2, 5 and 6: Bgl II; lanes 3, 4, 7, 8,10: Xcm I. L: Lambda phage-HindIII DIG labeled marker.

**S13c.** Western blot analysis. Lines 1, 2, WT; 3, 4, 7, 8  $\Delta$ *dek1*; 5, 6, 9, 10 *oex1*. Protein samples in lines 1, 3, 5, 7, 9 were heated before PAGE, samples 2, 4, 6, 8, 10 were not heated before PAGE. PL, protein ladder.

## Supplementary Data

**Supplementary Data sheet S1.** Summary table of the differential gene expression analysis of *DEK1* mutants.

**Supplementary Data sheet S2.** Summary table of overall deregulated biological processes, molecular functions, cellular components, anatomical entities and developmental stages in *DEK1* mutants as represented by the respective Gene Ontology (GO) and Plant Ontology (PO) partitions.

**Supplementary Data sheet S3.** Enriched ontology terms for the predicted *P. patens* gene regulatory subnetworks.

**Supplementary Data sheet S4.** Genes encoded by the five DEK1-controlled subnetworks.

**Supplementary Data sheet S5.** Summary table of the predicted regulatory interactions within and between the 11 subnetworks.

**Supplementary Data sheet S6.** Final filtered set of DEK1-controlled regulatory interactions.

**Supplementary Data sheet S7.** Enriched ontology terms for the filtered set of DEK1-controlled regulatory interactions (all targets and per subnetwork-pair/deregulation pattern type).

**Supplementary Data sheet S8.** Factorial Differential Gene Expression Network Enrichment Analysis (FDGENEA) of 17 phenotypic factors.

**Supplementary Data sheet S9.** Summary table of the DEK1-controlled regulatory interactions for *overbudding* associated genes.

**Supplementary Data sheet S10.** Full annotation of the genes associated with the *overbudding* phenotype (FDGENEA) including the cell type specific transcriptome data (Frank and Scanlon 2015; Figs 2a, b).

**Supplementary Data sheet S11.** Gene sets of the AP2 and MYB controlled circuits depicted in Figs. S10l, m.

**Supplementary Data sheet S12.** Primers used in this study.

**Supplementary Data sheet S13.** Key resources used in this study. Complete list of used antibodies, deposited data, experimental models/strains, software and algorithms including citations, sources, accession numbers and URLs.

## Supplementary References

1. Perroud, P. F. et al. The *Physcomitrella patens* gene atlas project: large-scale RNA-seq based expression data. *Plant J.* 95, 168-182 (2018).
2. Pimentel, H., Bray, N. L., Puente, S., Melsted, P. & Pachter, L. Differential analysis of RNA-seq incorporating quantification uncertainty. *Nat. Methods* 14, 687-690 (2017).
3. Horstman, A., Willemsen, V., Boutilier, K. & Heidstra, R. AINTEGUMENTA-LIKE proteins: hubs in a plethora of networks. *Trends Plant Sci.* 19, 146-157 (2014).

4. Scheres, B. & Krizek, B. A. Coordination of growth in root and shoot apices by AIL/PLT transcription factors. *Curr. Opin. Plant Biol.* 41, 95-101 (2018).
5. Aoyama, T. et al. AP2-type transcription factors determine stem cell identity in the moss *Physcomitrella patens*. *Development* 139, 3120-3129 (2012).
6. Gil, D. P., Law, J. N. & Murali, T. M. The PathLinker app: Connect the dots in protein interaction networks. *F1000Res* 6, 58 (2017).
7. Shannon, P., Markiel, A., Ozier, O., Baliga, N. S., Wang, J.T., Ramage, D., Amin, N., Schwikowski, B., Ideker, T. Cytoscape: a software environment for integrated models of biomolecular interaction networks. *Genome Res.* 13, 2498-2504 (2003).
8. Perroud, P. F. et al. Defective Kernel 1 (DEK1) is required for three-dimensional growth in *Physcomitrella patens*. *New Phytol.* 203, 794-804 (2014).
9. Whitewoods, C. D. et al. CLAVATA was a genetic novelty for the morphological innovation of 3D growth in land plants. *Curr. Biol.* 28, 2365-2376 (2018).
10. Ishikawa, M. et al. *Physcomitrella* STEMIN transcription factor induces stem cell formation with epigenetic reprogramming. *Nat. Plants* 5, 681-690 (2019).
11. Chandler, J. W. & Werr, W. DORNROESCHEN, DORNROESCHEN-LIKE, and PUCHI redundantly control floral meristem identity and organ initiation in Arabidopsis. *J. Exp. Bot.* 68, 3457-3472 (2019).
12. Aya, K. et al. The Gibberellin perception system evolved to regulate a pre-existing GAMYB-mediated system during land plant evolution. *Nat. Commun.* 2, 544 (2011).
13. Xu, Y., Iacuone, S., Li, S. F. & Parish, R. W. MYB80 homologues in Arabidopsis, cotton and Brassica: regulation and functional conservation in tapetal and pollen development. *BMC Plant Biol.* 14, 278 (2014).
14. Oshima, Y. et al. MIXTA-like transcription factors and WAX INDUCER1/SHINE1 coordinately regulate cuticle development in Arabidopsis and *Torenia fournieri*. *Plant Cell* 25, 1609-1624 (2013).
15. Schaefer, D. G. & Zryd, J. P. Efficient gene targeting in the moss *Physcomitrella patens*. *Plant J.* 11, 1195-1206 (1997).
16. Kamisugi, Y., Mitsuya, S., El-Shami, M., Knight, C. D., Cuming, A. C., Baker, A. Giant peroxisomes in a moss (*Physcomitrella patens*) peroxisomal biogenesis factor 11 mutant. *New Phytol.* 209, 576-589 (2016).
17. Robinson, J. T., Thorvaldsdóttir, H., Winckler, W., Guttman, M., Lander, E. S., Getz, G., Mesirov, J. P. Integrative genomics viewer. *Nat. Biotechnol.* 29, 24-26 (2011).
18. Johansen, W. et al. The DEK1 calpain Linker functions in three-dimensional body patterning in *Physcomitrella patens*. *Plant Physiol.* 172, 1089-1104 (2016).
19. Demko, V. et al. Genetic analysis of DEK1 Loop function in three-dimensional body patterning in *Physcomitrella patens*. *Plant Physiol.* 166, 903-919 (2014).
20. Robinson M. D., McCarthy D. J., Smyth, G. K. edgeR: a Bioconductor package for differential expression analysis of digital gene expression data. *Bioinformatics* 26, 139-140 (2010).

21. Lang, D. et al. The *Physcomitrella patens* chromosome-scale assembly reveals moss genome structure and evolution. *Plant J.* 93, 515-533 (2018).
22. Cooper, L. et al. The plant ontology as a tool for comparative plant anatomy and genomic analyses. *Plant Cell Physiol.* 54, e1 (2013).
23. Zimmer, A. D. et al. Reannotation and extended community resources for the genome of the non-seed plant *Physcomitrella patens* provide insights into the evolution of plant gene structures and functions. *BMC Genomics* 14, 498 (2013).
24. Fu, L., Niu, B., Zhu, Z., Wu, S. & Li, W. CD-HIT: accelerated for clustering the next-generation sequencing data. *Bioinformatics* 28, 3150-3152 (2012).
25. Perteza, G. & Perteza, M. GFF Utilities: GffRead and GffCompare. *F1000Res* 28, ISCB Comm. J-304 (2020).
26. Mölder, F., Jablonski, K.P., Letcher, B., Hall, M.B., Tomkins-Tinch, C.H., Sochat, V., Forster, J., Lee, S., Twardziok, S.O., Kanitz, A., Wilm, A., Holtgrewe, M., Rahmann, S., Nahnsen, S., Köster, J. Sustainable data analysis with Snakemake. *F1000Res* 10, 33 (2021).
28. Briesemeister, S., Rahnenführer, J. & Kohlbacher, O. Going from where to why--interpretable prediction of protein subcellular localization. *Bioinformatics* 26, 1232-1238 (2010).
29. Krogh, A., Larsson, B., von Heijne, G. & Sonnhammer, E. L. Predicting transmembrane protein topology with a hidden Markov model: application to complete genomes. *J. Mol. Biol.* 305, 567-580 (2001).
30. Jones D. T. Improving the accuracy of transmembrane protein topology prediction using evolutionary information. *Bioinformatics* 23, 538-544 (2007).
31. Emms, D. M. & Kelly, S. OrthoFinder: solving fundamental biases in whole genome comparisons dramatically improves orthogroup inference accuracy. *Genome Biol.* 16, 157 (2015).
32. Andrews, S. FastQC: a quality control tool for high throughput sequence data. <https://www.bioinformatics.babraham.ac.uk/projects/fastqc/> (2010).
33. Bolger, A. M., Lohse, M. & Usadel, B. Trimmomatic: a flexible trimmer for Illumina sequence data. *Bioinformatics* 30, 2114-2120 (2014).
34. Kluyver, T. et al. Jupyter Notebooks – a publishing format for reproducible computational workflows. In F. Loizides & B. Schmidt, eds. *Positioning and Power in Academic Publishing: Players, Agents and Agendas.* 87–90 (2016).
35. Conway, J. R., Lex, A. & Gehlenborg, N. UpSetR: an R package for the visualization of intersecting sets and their properties. *Bioinformatics* 33, 2938-2940 (2017).
36. Kucera, M., Isserlin, R., Arkhangorodsky, A. & Bader, G. D. AutoAnnotate: A Cytoscape app for summarizing networks with semantic annotations. *F1000Res* 5, 1717 (2016).
37. Scrucca, L., Fop, M., Murphy, T. B. & Raftery, A. E. mclust 5: Clustering, Classification and Density Estimation Using Gaussian Finite Mixture Models. *R. J.* 8, 289-317 (2016).
